1 **Novelty and emergent patterns in sperm: morphological diversity and evolution**  
2 **of spermatozoa and sperm conjugation in ground beetles (Coleoptera:**  
3 **Carabidae)**

4 **Running title: Diversity and evolution of ground beetle sperm**

5 R. Antonio Gomez\* & David R. Maddison

6 Department of Integrative Biology, Oregon State University, 3029 Cordley Hall,  
7 Corvallis, OR 97333

8 \*email of corresponding author: gomezr@oregonstate.edu

9

10 **1. Abstract**

11 The beetle family Carabidae, with about 40,000 species, exhibits enough  
12 diversity in sperm structure and behavior to be an excellent model system for  
13 studying patterns and processes of sperm evolution. We explore their potential,  
14 documenting sperm form in 177 species of ground beetles and collecting data on 1  
15 qualitative and 7 quantitative sperm phenotypic traits. Our sampling captures 61% of  
16 the tribal-level diversity of ground beetles. These data highlight the notable  
17 morphological diversity of sperm in ground beetles and suggest that sperm in the  
18 group have dynamic evolutionary histories with much morphological innovation and  
19 convergence. Sperm vary among species in total length from 48–3,400 $\mu\text{m}$  and in  
20 length and width of the sperm head. Most ground beetles make filamentous sperm  
21 with visually indistinct heads, but some or all studied members of the genus  
22 *Omopron*, genus *Trachypachus*, and tribe Dyschiriini make broad-headed sperm that  
23 show morphological differences between species. Most ground beetles package their  
24 sperm into groups of sperm, termed conjugates, and ground beetles show variation in  
25 conjugate form and in the number and arrangement of sperm in a conjugate. Most  
26 ground beetles make sperm conjugates by embedding their sperm in a non-cellular  
27 rod or spermatostyle, but some Trechitae make conjugates without a spermatostyle.  
28 The spermatostyle is remarkably variable among species and varies in length from  
29 17–41,000 $\mu\text{m}$ . Several unrelated groups of ground beetles make only singleton sperm,  
30 including Nebriinae, Cicindelinae, many Trechinae, and the tribe Paussini. Given  
31 current views about ground beetle relationships, we propose preliminary hypotheses  
32 on ground beetle sperm diversification. We hypothesize that spermatostyle and  
33 conjugate traits evolve faster than sperm traits and that head width evolves more  
34 slowly than head length and sperm length. We propose that conjugation with a  
35 spermatostyle evolved early within the history of Carabidae and that it has been lost  
36 independently at least three times.

37

38 **Key Words**

39 Post-mating sexual selection, morphological evolution, sperm form, emergence

40

41 **Research highlights**

- 42 • **Ground beetle sperm is morphologically diverse.**
- 43 • **Most species make sperm conjugates with a spermatostyle, and there is**
- 44 **variation in sperm, spermatostyles, and conjugates.**
- 45 • **Sperm have dynamic evolutionary histories.**

46

47 **2. Introduction**

48 Animal sperm are among the most morphologically diverse cell type known.  
49 Although sperm have been described from thousands of species, patterns in sperm  
50 evolution remain largely unexplored (Birkhead and Montgomerie, 2009). Despite  
51 their few constituent parts, almost every part of a sperm cell that could be altered has  
52 been altered over evolutionary time, including the loss of cellular structures typical of  
53 sperm such as flagella and nuclei (see review by Pitnick et al., 2009a). Sperm live  
54 particularly odd “lives”, being launched away from the soma to face a variety of  
55 challenges unique among animal cells (Sivinski, 1984); variation in the environments  
56 sperm encounter is thought to account for their diversity of form.

57 There is also variation in how sperm travel upon leaving the male soma; some  
58 travel as singletons, but others travel in groups (Fig. 1), called conjugates. In sperm  
59 conjugates, two or more sperm cells join or are joined together for motility or  
60 transport through the female reproductive tract (see review by Higginson and Pitnick,  
61 2011). Individual sperm in a conjugate frequently swim in a highly coordinated  
62 fashion (Taggart et al., 1993), and there is some evidence that an individual sperm’s  
63 form can be adaptive for conjugation (Immler et al., 2007; Taggart et al., 1993). Sperm  
64 conjugation is thought to be present in a small fraction of animal species but be  
65 taxonomically widespread. Given current phylogenetic hypotheses for relationships  
66 among animals (Hinchliff et al., 2015), it is likely that conjugation has evolved multiple  
67 times independently (Higginson and Pitnick, 2011).

68 In numerous animal clades, the striking variation of animal sperm form and  
69 function suggests that sperm are evolving rapidly and divergently. Rapid  
70 morphological divergence is common to reproductive traits and is a core prediction of  
71 evolution by sexual selection (Arnqvist and Rowe, 2005; Darwin, 1871; Eberhard,  
72 1985; 1996; Holman and Snook, 2006; Hosken and Stockley, 2004; Miller and Pitnick,  
73 2002; Parker, 1970; 1979; 2005; Pitnick and Hosken, 2010; Thornhill and Alcock,  
74 1983). Although post-mating sexual selection is widely considered to be the  
75 mechanism driving sperm morphological variation, the adaptive function of most

76 sperm traits is not known (Lüpold and Pitnick, 2018). Some sperm traits are  
77 recognized as exaggerated ornaments evolving under female choice or male  
78 persistence traits in sexual conflicts (e.g., Lüpold et al., 2016; Schärer et al., 2011).

79         The joining of sperm into groups of cells poses interesting broad scale  
80 evolutionary questions regarding how individual traits and group traits coevolve  
81 (Higginson and Pitnick, 2011). Do changes in sperm form drive changes in sperm  
82 conjugates such as the number of sperm in a group? Do the different components of a  
83 sperm conjugate show variation between species and if so, do they evolve at different  
84 rates? How do conjugates evolve? Is it the parts that change, or the arrangement of  
85 parts? Do females make decisions based upon a male's sperm as well as his sperm  
86 conjugate? Do sperm cooperate (Fisher et al., 2014; Immler et al., 2007; Moore et al.,  
87 2002; Pizzari and Foster, 2008)? Although it is too early to draw conclusions about  
88 general processes from the available literature on the topic, early signs indicate that  
89 evolution of sperm conjugation is a fertile topic of investigation (e.g., Ferraguti et al.,  
90 1989; Fisher et al., 2014; Higginson et al., 2012a,b; Immler et al., 2007; Moore et al.,  
91 2002; Sasakawa, 2007).

92         Ground beetles (family Carabidae) are a large clade suitable as a study system  
93 for understanding the evolutionary patterns and processes of sexual trait evolution, as  
94 previous studies hint at diverse sperm forms. Carabid beetles are an old, varied family  
95 of terrestrial insects with nearly 40,000 described species (Lorenz, 2005; 2018). They  
96 reproduce sexually and have internal fertilization (Crowson, 1981). During  
97 copulation, males inseminate females, and females store sperm prior to fertilization  
98 (Crowson, 1981). Female reproductive tracts are morphologically diverse across the  
99 family, but all are of the "cul-de-sac" type with one duct leading to and away from the  
100 sperm storage organ (Liebherr and Will, 1998). Previous studies report variation in  
101 sperm across the species that have been studied (Supporting Information Table S1  
102 and references therein). Ground beetle sperm vary in length from 68 $\mu$ m to 700 $\mu$ m  
103 (Takami and Sota, 2007; Sasakawa, 2009), and both sperm dimorphism and sperm  
104 conjugation are known to occur in the group (Supporting Information Table S1).

105         Although carabid beetles are a promising group in which to study sperm  
106 phenotypic evolution, essential data are lacking for most of the group's diversity  
107 (Supporting Information Table S1). For example, most of the data (54 of the 69  
108 studied species) come from only two genera, *Carabus* and *Pterostichus*, which are on  
109 widely separated branches of the tree of Carabidae. The near relatives of carabids, the  
110 diving beetles (Dytiscidae), are advancing as a system for studying sexual trait  
111 evolution (see review by Miller and Bergsten, 2014 and references therein). Diving  
112 beetles are known for their complex female reproductive tracts, diverse sperm forms  
113 with sperm length ranging from 128 $\mu$ m to 4493 $\mu$ m, three different qualitative types  
114 of sperm conjugation, and several, independently derived instances of dimorphism  
115 and/or conjugates that include more than one sperm morph (Higginson et al.,  
116 2012a,b). Carabid beetles are ten times as diverse as diving beetles, and if their sperm

117 are variable like their near relatives, carabids are likely to provide numerous  
118 opportunities for studying the evolution of complex sperm traits.

119 The primary goal of the present study is to document sperm morphological  
120 diversity in ground beetles, making an effort to sample broadly across this diverse  
121 radiation of terrestrial insects by gathering data from as many lineages as possible  
122 within the family. We examine patterns and trends in sperm evolution in light of our  
123 results.

124

### 125 **3. Materials & Methods**

#### 126 *Taxon sampling*

127 Our study focused on identifying broad-scale patterns in sperm form across  
128 carabid beetles, and we prioritized capturing morphological variation of sperm across  
129 subfamilies and tribes within Carabidae. In total we studied 177 species of carabid  
130 beetle classified in 121 genera across 61 tribes or approximately 0.44%, 5.8%, and  
131 61% of the known global diversity of carabid species, genera, and tribes (Table 1;  
132 Lorenz, 2005; 2018). Our attempt to sample different higher-level groups of ground  
133 beetles was guided by current classification of carabid beetles (e.g., Bousquet, 2012;  
134 Lorenz, 2005; 2018), current views about carabid relationships (e.g., Arndt et al.,  
135 2005; Figs. 3–4), and recent molecular phylogenetic studies of the group (Maddison et  
136 al., 1999; 2009; 2019; Ober, 2002; Ober and Maddison, 2008). Table 1 summarizes our  
137 sampling and includes the number of specimens studied per species by sex. We  
138 attempted to study multiple specimens per species in order to understand the  
139 stability of sperm traits within a species, and we averaged about two specimens per  
140 species (range = 1–8 specimens/species; Table 1).

141

#### 142 *Specimens*

143 Our study is based on a total of 397 specimens (Tables 1, 2, S2). We collected  
144 live beetles for sperm morphology in the United States, Mexico, the Republic of South  
145 Africa, and Mozambique. We also studied additional specimens preserved in 10%  
146 neutral-buffered formalin from Germany and Guatemala (Supporting Information  
147 Table S2). 10% neutral-buffered formalin has a long history of use in sperm  
148 morphology, and recent evidence from passerine birds suggests that it does not alter  
149 the form of sperm (Schmoll et al., 2016).

150 We kept beetles alive in small containers separated by collection locality and  
151 species prior to dissection or preservation in neutral-buffered formalin. When  
152 possible we stored the beetles in a refrigerator or cooler to limit movement and  
153 increase longevity. Following dissection and slide preparation, we associated slides

154 with their parent specimens with the use of unique alphanumeric codes given to each  
155 specimen. We attempted to identify all of our specimens to species with the aid of  
156 taxonomic literature or help from taxonomic specialists (see Acknowledgements). If  
157 we were unable to identify a specimen to species because it represents an  
158 undescribed species or is part of group in need of revision, the specimen was only  
159 identified to genus.

160

### 161 *Phylogeny*

162 The phylogenetic relationships of most ground beetles sampled for sperm data  
163 are not well understood, which limits insights into carabid sperm evolution. We use a  
164 low-resolution phylogenetic hypothesis of ground beetles to guide our interpretation  
165 of sperm data (Figs. 3–4). This phylogenetic hypothesis is based on published  
166 phylogenies with minor contributions from traditional classifications of ground  
167 beetles. The tree's shape is predominately derived from large-scale molecular studies  
168 of ground beetle phylogeny (Maddison et al., 1999; 2009; Ober, 2002; Ober and  
169 Maddison, 2008). Additional molecular phylogenetic studies provided support for  
170 relationships in the following clades: Carabinae (Osawa et al., 2004), Cicindelinae  
171 (Vogler and Pearson, 1996; Gough et al., 2018), Harpalini (Martínez-Navarro et al.,  
172 2005), Paussinae (Moore, 2008; Robertson and Moore, 2016), Pterostichini and allies  
173 (Will and Gill, 2008), and Trechinae (Maddison and Ober, 2011; Maddison et al.,  
174 2019).

175

### 176 *Use of terms in sperm conjugation*

177 The study of sperm conjugation has been complicated by the variation in  
178 sperm conjugation across animals and the historical lack of standard terms to refer to  
179 these structures and their method of development (Higginson and Pitnick, 2011).  
180 Previous workers have referred to the sperm conjugates of carabid beetles by a  
181 variety of terms such as sperm bundles (e.g., Hodgson et al., 2013), spermatodesms  
182 (Sasakawa, 2007; Sasakawa and Toki, 2008), or spermiozeugmata or similar (e.g.,  
183 Ferenz, 1986; Schubert et al., 2017). Higginson and Pitnick (2011) suggest restricting  
184 the use of terms like these to particular morphological and developmental patterns.  
185 Higginson and Pitnick (2011) identified two major types of conjugation: primary and  
186 secondary. Primary conjugates like spermatodesms result from the products of a  
187 single spermatogonium remaining grouped together following spermiogenesis  
188 (Higginson and Pitnick, 2011). Secondary conjugates like sperm bundles result from  
189 sperm becoming joined together after individualization with sperm that are not  
190 necessarily from the same cyst (Higginson and Pitnick, 2011).

191 Data are still lacking regarding whether the sperm conjugates of carabid  
192 beetles are primary or secondary conjugates. Evidence from beetles in the closely

193 related families Haliplidae and Gyrinidae that make conjugates that look similar to  
194 those in many carabids (Breland and Simmons, 1970; Higginson and Pitnick, 2011)  
195 suggests that they are spermatodesms. Schubert et al., (2017) studied the  
196 reproductive tract and spermatogenesis in a carabid beetle, *Limodromus assimilis*, and  
197 came to a different conclusion. They examined various sections of the male internal  
198 tract in this beetle and found that sperm individualize prior to becoming joined  
199 together with a hyaline rod (Schubert et al., 2017). It is still unclear whether the  
200 sperm conjugates of *L. assimilis* are composed of sperm derived from a single  
201 spermatogonium, which is necessary for it to be considered to be primary  
202 conjugation. The form of the male internal tract of *L. assimilis* is also highly similar to  
203 whirligig beetles in the genus *Dineutus*, which are known to make spermatodesms  
204 (Pitnick, unpublished data). Because of the uncertainty in conjugate type in carabid  
205 beetles studied thus far and the lack of data for the overwhelming majority of species  
206 in the family, we choose to refer to these multi-sperm forms by the neutral term  
207 conjugate (Fig. 1).

208 We classified the variation in conjugation we observed into different  
209 qualitative discrete types (Figs. 2–3). If we did not observe any physical association  
210 between two or more sperm, we considered those species to lack conjugation. The  
211 conjugates of species that make sperm that are physically associated via their heads  
212 with a hyaline rod, or spermatostyle, with unbounded flagella were considered rod  
213 conjugates. Conjugates characterized by sperm with flagella that are bounded to a  
214 spermatostyle were considered sheet conjugates following Sasakawa, (2007). Those  
215 with sperm joined together via their heads and cementing material but without a  
216 spermatostyle were considered aggregate conjugates (Higginson et al., 2012a). In  
217 some rare cases, we observed species that make singleton sperm bounded to a  
218 spermatostyle with a 1-to-1 match between sperm and spermatostyle. We did not  
219 consider this to be an example of sperm conjugation. Conjugates that form as a result  
220 of sperm grappling onto one another in a seemingly imprecise location were  
221 considered mechanical conjugates reminiscent of the sperm trains of muroid rodents  
222 (Higginson and Pitnick, 2011).

223

#### 224 *Sperm and tissue preparation for light microscopy*

225 Our survey largely focused on the form of mature spermatozoa of different  
226 species of carabid beetles. We dissected both males and females and extracted sperm  
227 from either the seminal vesicle of males or the sperm storage organ (spermatheca) of  
228 females, respectively. Our sampling (Table 1) is biased towards male beetles because  
229 aspects of our sampling were largely opportunistic, the probability of collecting  
230 mature sperm is high in males whereas in females it requires their having been  
231 inseminated, and we found consistent evidence that sperm, particularly sperm  
232 conjugates, undergo changes in the female reproductive tract, posing challenges for

233 documenting sperm form prior to their exposure to the environment of the female  
234 reproductive tract.

235 Our sperm preparation methods largely followed those of Higginson et al.,  
236 (2012a; 2015). We removed the external and internal genitalia from live beetles or,  
237 rarely, beetles preserved in 10% neutral buffered formalin, and placed them in a small  
238 drop of 1X Phosphate Buffered Saline (PBS) prior to further dissection. For small-  
239 bodied beetles (5mm and smaller), we frequently removed the entire abdomen and  
240 placed it in 1X PBS prior to isolating portions of the reproductive tract and collecting  
241 sperm. We reassociated dissected tissues with the specimen either by placing them on  
242 the slide alongside the sperm or, more commonly, by placing them in a micro vial with  
243 glycerin stored beneath the pinned specimen.

244 For males, we first isolated the accessory glands and testes from the aedeagus.  
245 We then used an insect pin and fine forceps to gently loosen the testes and male  
246 internal tract. We identified the vas deferens where it meets the accessory glands and  
247 severed a portion of it. We transferred the severed portion of the male's tract to a  
248 small drop of 1X PBS on a clean gelatin-coated or charged slide. We gently shook the  
249 tissue to release sperm into the saline or held the tissue with forceps and ran fine  
250 scissors along the length of the tract to extract sperm. For females, we generally  
251 isolated the spermatheca and its subtending duct from the bursa copulatrix (Liebherr  
252 and Will, 1998). We transferred the severed tract to a drop of 1X PBS on a clean  
253 subbed slide. We gently shook the tissue to release sperm or made a longitudinal  
254 incision along the outer wall of the spermatheca and compressed it to release stored  
255 sperm. After collecting sperm, the slides were allowed to air dry and were stored in  
256 slide boxes prior to fixation, staining, and mounting.

257 The majority of our sampling is based on sperm preparations made using a  
258 portion of the male's seminal vesicle or female's spermatheca. In a few cases, however,  
259 we also made observations from slides of testes, additional female reproductive tract  
260 structures, and spermatophores by placing the tissues or spermatophores in saline on  
261 a subbed slide and allowing the slide to air dry.

262 Once dry, we fixed and stained the slides using two different protocols. For 21  
263 of our earliest samples (up to specimen RAGspcmn000000134), we simultaneously  
264 fixed and stained sperm using SpermBlue and the manufacturer's standard protocol  
265 (van der Horst and Maree, 2010) followed by mounting in Euparal. Sperm heads in  
266 carabid beetle sperm were not easily visible with SpermBlue and brightfield  
267 microscopy, and we switched to viewing heads using DAPI and fluorescence. For DAPI  
268 staining, we first placed slides in Coplin jars with a 3:1 mixture of methanol and acetic  
269 acid for 1 minute. After fixation, we rinsed the slides in 1X PBS for 1 minute and then  
270 removed the slides from buffer to dry briefly. Once partly dry, we placed a 2 $\mu$ l drop of  
271 ProLong Diamond Antifade Mountant with DAPI on top of our sample along with a  
272 clean cover slip and left the mountant to cure for at least 24 hours.

273

274 *Light microscopy, imaging, and image analysis*

275 For eight species we recorded videos of live sperm *in vitro* using a Leica Z6 lens  
276 and JVC KY-F75U camera in conjunction with Microvision's Archimed software. Sperm  
277 were removed from beetles using our standard dissection procedure and placed on a  
278 slide in 1X PBS under a coverslip. We recorded a total of 16 short movies of live  
279 ground beetle sperm conjugates from eight species at ambient temperature  
280 (Supporting Information MV1–MV16). Although the videos are low quality, they give a  
281 coarse-grained view of how the conjugates of these species move and perhaps insight  
282 into how morphologically similar conjugates might move.

283 We visualized dead sperm using brightfield, darkfield, and fluorescence  
284 microscopy and differential interference contrast (DIC) on a Leica DM5500 compound  
285 microscope. We observed sperm and sperm conjugates at magnifications ranging  
286 between 100–400x depending on the size of the subject. Sperm heads were most  
287 easily visualized with fluorescence at 1000x as they are regularly about 1 $\mu$ m in length.

288 We used a Leica C425 camera paired with the Leica LAS software package to  
289 image our samples on a Leica DM5500 microscope. We chose to photograph sperm  
290 and sperm conjugates that were relatively isolated, in good condition, and easy to  
291 image or measure. We took a variable number of photographs per specimen and/or  
292 sperm preparation depending on the complexity and size of the subject matter, the  
293 quality of the preparation, and the sex of the beetle. For instance, sperm longer than  
294 1mm frequently required taking more than one photo and stitching them together  
295 afterwards to fully capture the entire cell in a single image. We attempted to image at  
296 least five individual sperm cells and at least five sperm conjugates per preparation.  
297 We did not take measurements of sperm conjugates from females as the conjugates  
298 are modified by the female's reproductive tract. We made qualitative observations of  
299 sperm conjugates from our female preparations and categorized conjugates by type.

300 We gathered morphometric data on sperm morphological variation in carabid  
301 beetles from these photographs using ImageJ (Rasband, 2012). We recorded data on  
302 the physical dimensions of individual sperm and the resulting conjugate when  
303 present. We studied 5.4 sperm on average per preparation across all preparations  
304 (n=397). Sperm conjugation was observed in 147 of 177 species, and we studied 4.56  
305 sperm conjugates on average per preparation among the 212 male preparations with  
306 conjugates. We gathered linear morphometric data for the following six traits: sperm  
307 length, head length, head width, spermatostyle length, spermatostyle width, conjugate  
308 length, and the length of the spermatostyle that is bare apically. We also directly  
309 counted or estimated the number of sperm found within a given conjugate. Carabid  
310 beetle sperm conjugates can frequently include hundreds to thousands of sperm, and  
311 when a direct count of sperm number was not an option, we used ImageJ and  
312 calculated the corrected total cell fluorescence of sperm heads or mitochondrial



313 derivatives following McCloy et al., (2014) to estimate the number of sperm in a  
314 conjugate from our DAPI-stained sperm preparations.

315 We investigated the precision of our instruments and workflow in order to  
316 determine the number of significant figures we can reliably report in our  
317 measurements. To do this, we repeatedly measured identical subjects from  
318 photographs obtained from several rounds of imaging and microscope recalibration at  
319 different magnifications. Results from our test showed that we could reliably measure  
320 quantitative sperm traits down to two significant figures. For example, our  
321 instruments and workflow were precise to the nearest  $1\mu\text{m}$  when measuring sperm  
322 heads between  $10\text{-}20\mu\text{m}$  in length and were precise to the nearest  $0.1\mu\text{m}$  for sperm  
323 heads about  $1\mu\text{m}$  or less in width. Based on the results of our investigation, we  
324 rounded off our measurements to two significant figures.

325

#### 326 *Data accessibility*

327 Specimens dissected for this study and all resulting slides are stored in the  
328 personal research collection of RA Gomez and are available for examination upon  
329 request. The 6,499 light microscope images we captured are all available online  
330 through Morphobank (at <http://morphobank.org/permalink/?P3123>) and are  
331 organized by species and specimen code. We took a dorsal habitus photograph of one  
332 specimen of each species we studied for this project excluding *Pseudaptinus*  
333 *tenuicollis*. These photos are available online through Morphobank.

334

## 335 **4. Results**

### 336 *Overview of sperm form in carabid beetles*

337 Our dataset includes new sperm data for 177 species of carabid beetle from  
338 throughout the group's taxonomic breadth (Fig. 2) and reveals notable variation in  
339 ground beetle sperm, sperm conjugates, and sperm storage (Fig. 5–12). These data are  
340 summarized by species in Table 2 and by specimen in Supporting Information  
341 Spreadsheet S1. In advance of presenting taxon-by-taxon results (next section), we  
342 provide here an overview of our findings.

343 New discoveries from our study include new instances of sperm conjugation,  
344 types of sperm conjugation previously unknown for the family, new occurrences of  
345 singleton sperm, newly documented sperm phenotypic variation, and the discovery  
346 that some female ground beetles store different parts of the sperm conjugate in  
347 different organs.

348 Sperm length frequently varies from one lineage to another, but sperm heads  
349 are almost always slender and narrow (Fig. 2B–C). Carabid beetle sperm range in total  
350 length from 48–3400 $\mu\text{m}$  whereas head width ranges from 0.2–6.3 $\mu\text{m}$ . Very few  
351 lineages of carabid beetles possess broad-headed sperm (Fig. 2C), but those that do,  
352 such as the genus *Omophron* (Fig. 6F–J) and many Dyschiriini, have very distinctive  
353 sperm that may be species-specific (Fig. 9I–N). Sperm head length varies much less  
354 than sperm total length and ranges from 0.5–270 $\mu\text{m}$ . Most ground beetles make  
355 sperm with heads that are shorter than 20 $\mu\text{m}$  in length. The sperm head is generally  
356 conspicuous as a single region of fluorescence following DAPI staining, but sperm in  
357 several lineages show two regions of fluorescence following DAPI staining: one faint  
358 region anteriorly approximately 1–2 $\mu\text{m}$  in length and a second prominent filament of  
359 much higher intensity fluorescence (Fig. 7B; Schubert et al., 2017). We attributed the  
360 short, faint region of fluorescence to the sperm's nuclear DNA and the second,  
361 prominent region of fluorescence to the sperm's mitochondrial DNA based on TEM  
362 observations of ground beetle sperm ultrastructure (Dallai et al., 2019; Witz, 1990;  
363 Gomez, unpublished data) and a recent study of carabid sperm with a similar staining  
364 pattern (Schubert et al., 2017). We considered the short, faint region of fluorescence  
365 the head because of its compact size, which is typical of heads of ground beetle sperm  
366 with this staining pattern (Schubert et al., 2017) and its location, as it is consistently  
367 located on the end of the sperm that is embedded in the spermatostyle.

368 Some male carabid beetles make singleton sperm, but the vast majority instead  
369 make sperm conjugates (Figs. 2–4), usually by joining variable numbers of sperm to a  
370 non-living structure called a spermatostyle. Sperm conjugation without a  
371 spermatostyle can be found in some trechite carabid beetles such as some Bembidiini,  
372 which make aggregate conjugates with few sperm (Figs. 7D–E). It is also found in  
373 some tachyine trechites such as *Tachyta inornata* and *Tachyura rapax*, whose sperm  
374 form haphazard groupings by grappling onto one another (Figs. 7–J). Singleton sperm  
375 were observed in several unrelated carabid lineages, including *Nebria* and near  
376 relatives (subfamily Nebriinae), *Gehringia olympica* (tribe Gehringiini), *Apotomus* sp.  
377 (tribe Apotomini), *Eucamaragnathus oxygenus* (tribe Hiletini), various tribes in the  
378 large clade Trechitae, tiger beetles (subfamily Cicindelinae), the ant parasite genus  
379 *Paussus* and near relatives (tribe Paussini), and the subfamily Broscinae (Fig. 3).

380 The spermatostyle is present in nearly all ground beetles that make conjugates  
381 (Figs. 3–4). It is absent in all examined species that make singleton sperm except for  
382 two instances in the tribe Broscini indicating that sperm conjugation does not always  
383 follow spermatostyle production (Figs. 8A–C). We studied two Broscini, *Zacotus*  
384 *matthewsii* and *Broscodera insignis*, and both make singleton sperm joined to  
385 individual spermatostyles.

386 Several different aspects of the spermatostyle have been modified through  
387 evolutionary time, including size, overall shape, shape of the apex, placement or  
388 location of sperm on the spermatostyle, rigidity, thickness, and texture. Some carabid

389 beetles make spermatostyles of varying sizes or two different size classes of similarly  
390 shaped spermatostyles (Takami and Sota, 2007). Males of the bombardier beetle  
391 *Brachinus elongatulus* make two distinct conjugates using two very different  
392 spermatostyles (Fig 11A–B).

393 The spermatostyle displays remarkable variation in length with relatively little  
394 variation observed in its width (Fig. 2D,E). As with sperm, the width of the  
395 spermatostyle tends to be fairly conserved across Carabidae. The widest  
396 spermatostyle we observed measured on average 140 $\mu$ m at its broadest. Most species,  
397 however, make spermatostyles that are much narrower in width, usually measuring  
398 between 2–20 $\mu$ m. The longest individual spermatostyle we observed was 5.8cm  
399 whereas the shortest individual spermatostyle we observed measured only 13 $\mu$ m, a  
400 more than 4,000-fold difference in length (Supporting Information Spreadsheet S1).  
401 The spermatostyle frequently varies in length between related species within major  
402 carabid lineages suggesting that spermatostyle length evolves rapidly and  
403 convergently (Figs. 2–4).

404 Spermatostyles are frequently rod-shaped, fusiform, or comet-shaped (broader  
405 anteriorly and attenuating to a narrow point posteriorly), but there are many  
406 exceptions. Some spermatostyles maintain this general shape but are helically shaped  
407 and rigid like a corkscrew (e.g., *Promecognathus laevissimus* spermatostyles; Fig. 8D–  
408 F) or compacted like a slinky (e.g., *Chlaenius ruficauda* spermatostyles; Fig. 11G).  
409 Others are cap-like and gelatinous (e.g., *Chlaenius prasinus* spermatostyles) or thin  
410 and ribbon-like (e.g., *Stenocrepis elegans* spermatostyles; Fig. 11I). Sperm can also be  
411 distributed along the spermatostyle in a variety of ways and in varying numbers. We  
412 recorded as few as five sperm in a conjugate to as many as a few thousand. The  
413 spermatostyle can include hyaline flanges (Figs. 6E, 8D) and channels or grooves that  
414 appear to be associated with sperm attachment or storage (Fig. 12D). The material  
415 surrounding sperm at their attachment point to the rod can have a different  
416 appearance compared to the remainder of the rod (Dallai et al., 2019; Hodgson et al.,  
417 2013). *Clivina* species make a capsule-like spermatostyle with a large sealed cavity  
418 that contains a mass of sperm (Fig. 9A). Sperm are usually densely distributed on all  
419 sides of a spermatostyle, but this trait is also variable. There are frequently extensive  
420 bare regions without attached sperm on the spermatostyles of many ground beetle  
421 conjugates (e.g., Figs. 6F, 9B, 9F, 12E). These bare regions are frequently found on the  
422 anterior end, but they commonly occur medially (Fig. 11K) or, in a few species,  
423 posteriorly. In *Aspidoglossa subangulata* sperm are attached to only one side of the  
424 spermatostyle, and although these large spermatostyles measure 6.6mm, less than  
425 1mm of their length bear sperm (Fig. 9B). In *Dyschirius tridentatus*, the sperm are  
426 embedded in the spermatostyles via their heads in a single row with regular intervals  
427 between sperm (Figs. 9F–G). The spermatostyle commonly appears to be designed to  
428 accommodate sperm, particularly when the sperm heads are broad. Sperm will  
429 frequently be placed parallel to the longitudinal axis of the spermatostyle, but this is  
430 less common when sperm are broad-headed. For example, the broad-headed sperm of

431 *Trachypachus* are placed within diagonally arranged slots on one side of the  
432 spermatostyle (Fig. 5G).

433 We dissected several female carabid beetles (Table 1), and we were usually  
434 able to recover sperm, indicating that most wild-caught females had been mated at  
435 least once. Of those preparations that were successful, we found that females stored  
436 sperm in their cul-de-sac type spermatheca and its adjoining duct. Conjugated sperm  
437 appear to become disassociated from each other in the spermatheca, and we  
438 consistently observed morphological differences in the spermatostyles recovered  
439 from our male and female slide preparations with spermatostyles recovered from  
440 female reproductive tracts appearing thinner, compressed, possibly digested, or  
441 completely absent in some of our female preparations (Figs. 12E–J). We frequently  
442 recovered some intact conjugates from our female preparations, but the spermathecae  
443 typically contained mostly individual sperm.

444 An unexpected sperm-female interaction from our study is the discovery that  
445 some females store different components of the male's sperm conjugate in different  
446 storage organs (Figs. 12A–D). Females in the genus *Galerita* appear to store large  
447 quantities of spermatostyles in a balloon-shaped storage organ and individual sperm  
448 in a physically removed small spherical organ that had been thought to be glandular  
449 by Liebherr and Will, (1998). We surmise that female *Galerita* and relatives may have  
450 partially decoupled spermatostyle morphological evolution from sperm evolution by  
451 storing sperm and spermatostyles in different organs. It is clear from our study that  
452 sperm conjugation in Carabidae is widespread and variable, and females are  
453 interacting with conjugates, sperm, and spermatostyles. However, much research  
454 remains to be done to tease apart the nature and consequences of these sperm-female  
455 and conjugate-female interactions.

456

457 *Sperm form across major groups of carabid beetles*

458 Subfamily Carabinae (Fig. 1A–E; 5A–E; 12I–J)

459 *Species examined.* (Table 1). Tribe Carabini: *Carabus nemoralis*, *Carabus taedatus*, and  
460 *Calosoma peregrinator*. Tribe Cychrini: *Cychrus tuberculatus*, *Scaphinotus marginatus*,  
461 *Sphaeroderus schaumii*, and *Sphaeroderus stenostomus*.

462 *Sperm overview.* The sperm of carabines tend to be among the shortest known sperm  
463 in carabid beetles (Table 2; Fig. 4A). The sperm thus far known are filamentous with  
464 slender heads that are visually indistinguishable from the rest of the cells (Fig. 5C).  
465 The sperm heads are obvious with DAPI staining (Figs. 5A, C).

466 All examined species of carabines make sperm conjugates with a spermatostyle  
467 (Table 2). The sperm conjugates of carabines all feature a spermatostyle that is either  
468 cap-like, short, and gelatinous in appearance (Figs. 5A–B) or rod-like, elongate, and

469 stiff (Figs. 1A–E; 5D). Sperm are embedded in the spermatostyle via their heads  
470 although their flagella are unbounded (Figs. 1A–E). Species of *Calosoma* and *Carabus*  
471 (tribe Carabini) make sperm conjugates that are reminiscent of shuttlecocks with a  
472 short oblong spermatostyle. Longer spermatostyles with likely more sperm have been  
473 previously recorded from species of *Carabus* subgenus *Ohomoperus* (Takami and Sota,  
474 2007). Species of *Sphaeroderus* and *Scaphinotus* (tribe Cychrini) make elongate  
475 conjugates composed of lengthy spermatostyles that include a large number of  
476 associated sperm.

477 *Within-species variation.* Carabines, particularly members of the genus *Carabus*, are  
478 among the best-studied carabid beetles for sperm morphology. Takami and Sota,  
479 (2007) studied several species of *Carabus* in the subgenus *Ohomopterus* and observed  
480 conjugate size polymorphism between specimens; many *Ohomopterus* make a single  
481 sperm form that is packaged into different size classes of conjugates (Takami and Sota,  
482 2007). Takami and Sota, (2007) also found evidence for a positive correlation  
483 between risk of sperm competition and sperm conjugate polymorphism. If conjugates  
484 perform different roles depending on their size, different size classes of sperm  
485 conjugates would be expected.

486         Among the carabines we examined for this study, we found significant within-  
487 male conjugate size variation (Fig. 5E) in the species of Cychrini we studied, and  
488 minimal variation in *Carabus* and *Calosoma* (tribe Carabini). *Scaphinotus marginatus*  
489 and the two *Sphaeroderus* species we studied make a single short sperm morph, but  
490 males package their sperm into conjugates of different sizes (Table 2; Fig. 5E). The  
491 *Carabus* and *Calosoma* species we studied all make sperm conjugates with  
492 spermatostyles that vary less dramatically in length within males (Table 2; Fig. 5E).

493 *Within-genera variation.* Our sampling included two different species of the large  
494 cosmopolitan genus *Carabus*, which is split into numerous subgenera and two species  
495 of the eastern North American genus *Sphaeroderus*. We observed distinct differences  
496 in sperm length, placement of sperm in their conjugates, and number of included  
497 sperm between *C. (Tanaocarabus) taedatus* and *C. (Archicarabus) nemoralis*. We note  
498 that these species are likely not particularly closely related. Within *Carabus* subgenus  
499 *Ohomopterus*, Takami and Sota, (2007) observed variation in conjugate size  
500 polymorphism as well as minor variation in sperm length among several closely  
501 related species. Two *Sphaeroderus*, *S. schaumii* and *S. stenostomus*, possess  
502 morphologically similar sperm.

503 *Reproductive tract observations.* Male carabines tend to devote a considerable amount  
504 of intra-abdominal space to their testes and accessory glands. Perhaps because of the  
505 small size of their sperm and their generally large bodies, carabines consistently  
506 appear to make very large quantities of sperm.

507         We recovered partly bare spermatostyles from the spermathecae of female  
508 specimens of *Cychnus tuberculatus*, *Scaphinotus marginatus*, and *Sphaeroderus*

509 *stenostomus* (Figs. 12I–J), confirming that the conjugates of conspecific males travel to  
510 the spermatheca.

511 *Comments.* Bouix, (1961; 1963) studied the sperm of several species of *Carabus* and  
512 reported finding dramatic instances of sperm polymorphism in DNA complement with  
513 some beetles having macrocephalic sperm with multiple sets of chromosomes. We did  
514 not investigate this topic systematically, but we found no instances of sperm  
515 polymorphism in DNA content in our samples. DAPI stained sperm heads within a  
516 species gave consistent fluorescent signals from cell to cell, which would not be  
517 expected if some sperm had more DNA. We suspect that Bouix, (1961; 1963) may  
518 have mistaken sperm conjugates for individual sperm cells, but this topic awaits  
519 further inquiry.

520

521 Subfamily Elaphrinae (Figs. 5; 12G–H)

522 *Species examined.* (Table 1). Tribe Elaphrini: *Elaphrus purpurans* and *Blethisa*  
523 *oregonensis*.

524 *Sperm overview.* The sperm of elaphrines are short and filamentous (Table 2). The  
525 sperm heads are thin, tapered anteriorly, and are visually indistinguishable from the  
526 flagella (Fig. 5F). The heads are conspicuous with DAPI staining.

527 Both *Elaphrus* and *Blethisa* make sperm conjugates with moderately long rod-  
528 like spermatostyles (Table 2; Fig. 5F). The sperm are embedded in the spermatostyles  
529 via their heads with unbounded flagella, and the sperm are distributed more or less  
530 equally on all sides of the spermatostyles except for a short region anteriorly without  
531 attached sperm (Fig. 5F). The spermatostyles differ in size between *E. purpurans* and  
532 *B. oregonensis* but are similar in overall shape. The spermatostyles are narrowly  
533 rounded anteriorly and tapered posteriorly and resemble comets.

534 *Within-species variation.* Both male *B. oregonensis* studied showed high levels of size  
535 variation in spermatostyle length and the number of sperm in a conjugate with almost  
536 no variation between specimens in sperm size or variation in the density of sperm  
537 placement along the spermatostyle (Supporting Information Spreadsheet S1). The  
538 form of *B. oregonensis* sperm conjugates appears stable within males and within the  
539 species.

540 *Reproductive tract observations.* We recovered several largely intact conjugates from  
541 the spermatheca of one female *E. purpurans* and several completely bare  
542 spermatostyles from the spermatheca of a second female (Fig. 12G–H).

543 *Sperm motility observations.* The conjugates of *E. purpurans* move in the direction of  
544 the spermatostyle's tapered slender end, which we considered posterior based on the  
545 anterior orientation of the sperm heads in the spermatostyle and histological studies

546 of carabid conjugates (Hodgson et al., 2013; Schubert et al., 2017). It appears as  
547 though the sperm do not helically beat their flagella along their longitudinal axis but  
548 instead maintain a regular stroke pattern. The resulting movement of the conjugate is  
549 directional, similar to a rowboat (Supporting Information movies MV5–MV8). There  
550 does not appear to be any difference in swimming patterns between conjugates  
551 recovered from a female's spermatheca and those found in a spermatophore.

552

553 Subfamily Trachypachinae (Fig. 5G–H)

554 *Species examined.* (Table 1). Tribe Trachypachini: *Trachypachus inermis* and  
555 *Trachypachus slevini*.

556 *Sperm overview.* The sperm of *Trachypachus* is moderately long and filamentous  
557 (Table 2). Our measurements of sperm length in *T. slevini* vary somewhat across  
558 specimens (Supporting Information Spreadsheet S1) suggesting that sperm length in  
559 *T. slevini* is variable or that this variation is an artifact of our slide preparations for  
560 these samples. The sperm heads are slightly broader than the remainder of the cells  
561 (Fig. G). The heads are rod-shaped and appear narrowly rounded anteriorly (Fig. 5G).

562 The conjugates of *Trachypachus* are distinctive because of the asymmetrical  
563 arrangement of sperm in a conjugate, the small number of sperm in a conjugate, and  
564 the small size of the spermatostyle (Table 2; Fig. 5G). The spermatostyle is narrowly  
565 rounded anteriorly and attenuated posteriorly to a thin point. Sperm are located on  
566 only one side of the spermatostyle, and the heads are arranged diagonally relative to  
567 the longitudinal axis of the spermatostyle.

568 *Within-genera variation.* *Trachypachus inermis* sperm and their heads are slightly  
569 shorter than the sperm and heads of *T. slevini*, respectively.

570 *Reproductive tract observations.* We recovered two mostly complete conjugates from  
571 the spermatheca of a female *T. slevini* (Fig. 5H). The spermatostyles are asymmetrical  
572 with diagonally arranged slots and are similar to the spermatostyles of *T. inermis*  
573 sperm conjugates.

574 *Sperm motility observations.* *Trachypachus slevini* conjugates appear to move faster  
575 than individual sperm and seem able to change direction readily (Supporting  
576 Information MV15–MV16).

577

578 Subfamily Loricarinae (Figs. 6A, E)

579 *Species examined.* (Table 1). Tribe Loricerini: *Loricera foveata* and *Loricera*  
580 *decempunctata*.

581 *Sperm overview.* *Loricera* sperm are short and filamentous (Table 2). The sperm heads  
582 are thin, tapered anteriorly, and are visually indistinguishable from the flagella (Fig.  
583 6E). The heads are conspicuous with DAPI staining (Fig. 6E).

584 Gilson, (1884) first viewed the large conjugates of *Loricera* but mistook them  
585 for spermatophores. The sperm conjugates of *Loricera* include a long and thin  
586 spermatostyle with numerous sperm embedded via their heads with unbounded  
587 flagella (Fig. 6A). The sperm are distributed more or less equally on all sides of the  
588 spermatostyle along its entire length apart from a short region anteriorly (Fig. 6A).  
589 The spermatostyle is rod-like and narrows to a sharp point anteriorly and posteriorly.  
590 It is crescent-shaped and curved.

591 *Within-genera variation.* Sperm differ slightly in total length between *L. foveata* and *L.*  
592 *decempunctata*, but our data are limited.

593 *Reproductive tract observations.* The spermatheca of *Loricera* resembles a Gordian  
594 knot, and we found several sets of spermatostyles within the spermathecae of our  
595 specimens of *L. foveata* (Supporting Information MV9).

596

597 Subfamily Nebriinae (Figs. 6B–D)

598 *Species examined.* (Table 1) Tribe Nebriini: *Nebria brevicollis*. Tribe Opisthiini:  
599 *Opisthius richardsoni*. Tribe Notiophilini: *Notiophilus sylvaticus*.

600 *Sperm overview.* Sperm in Nebriinae are generally long and filamentous (Table 2).  
601 Sperm heads in nebriines are either thin, tapered apically, and visually indistinct as in  
602 many other early-diverging carabid groups or rod-like and slightly broader than the  
603 remaining portions of the cells. *Opisthius richardsoni* sperm heads are rod-like and are  
604 slightly thickened (Fig. 6C–D). The sperm of *N. brevicollis* and *Notiophilus* are notable  
605 for having rather long heads that are visually indistinct when unstained (Fig. 6B).

606 All nebriines studied to date only make singleton sperm with no evidence of a  
607 spermatostyle (Table 2). Depending on the phylogenetic position of nebriines, this  
608 could represent an early loss of conjugation and the spermatostyle in the tree of  
609 Carabidae (Fig. 2) or singleton sperm could be the ancestral state of Carabidae.

610

611 Subfamily Omophroninae (Figs. 6F–J)

612 *Species examined.* (Table 1). Tribe Omophronini: *Omophron americanum* and  
613 *Omophron ovale*.

614 *Sperm overview.* The sperm of *Omophron* are among the most distinctive sperm in  
615 carabid beetles (Table 2). The sperm heads are broad, asymmetrical and



616 approximately V-shaped (Figs. 6G, I), and the flagellum joins the head asymmetrically  
617 on one of its sides (Fig. 6J).

618 The sperm of *Omophron* conjugates are arranged in a highly organized fashion  
619 inside of a rod-like spermatostyle (Fig. 6F–G,I). The sperm heads are paired together  
620 such that the side of the head bearing the flagellum is lateral (Fig. 6G,I). These pairs of  
621 sperm are radially stacked one inside of another in a row that is very reminiscent of  
622 the rouleaux stacking in diving beetle sperm (Higginson et al., 2012a; Pitnick et al.,  
623 2009a). Unlike the rouleaux stacking of diving beetles, the stacked grouping of  
624 *Omophron* sperm heads are embedded in a rod-like spermatostyle (Table 2). The  
625 spermatostyle is bare for approximately 80% of its length in *O. americanum* (Fig. 6H)  
626 and about 50% of its length in *O. ovale* with sperm located only in the posterior part of  
627 the conjugate (Fig. 6F).

628 *Within-genera variation.* Sperm are notably different between *O. americanum* and *O.*  
629 *ovale* with numerous morphological differences in their sperm. The sperm differ in  
630 total length, head size and shape, spermatostyle length, and the extent to which the  
631 spermatostyle lacks sperm.

632 *Reproductive tract observations.* We have been unable to recover sperm from the  
633 female reproductive tract of field-collected *Omophron* females despite at least six  
634 attempts to do so. In contrast, in other carabid genera we typically found sperm in a  
635 female's spermatheca. *Omophron* is unusual in this regard, and we speculate that  
636 either our timing was bad or females are storing sperm in another location or using it  
637 in a non-typical way.

638

639 Subfamily Trechinae, Tribe Patrobini (Figs. 7A–B)

640 *Species examined.* (Table 1). *Diplous filicornis* and *Patrobus longicornis*.

641 *Sperm overview.* Patrobine sperm are short and filamentous (Table 2; Figs. 7A–B). The  
642 heads are short and compact and visually indistinct. When stained with DAPI,  
643 patrobine sperm show two regions of fluorescence.

644 The sperm conjugates of patrobines include a simple rod-like spermatostyle  
645 with sperm embedded via their heads with unbounded flagella (Table 2; Figs. 7A–B).  
646 We did not gather morphometric data from the sperm conjugates recovered from our  
647 female specimen of *D. filicornis*, but it is clear that *D. filicornis* males make rod  
648 conjugates with generally 50 sperm or less embedded in a short and slender  
649 spermatostyle.

650 *Reproductive tract observations.* We recovered several seemingly intact sperm  
651 conjugates from the spermatheca of a female *D. filicornis*.

652

653 Subfamily Trechinae, Supertribe Trechitae (Figs. 7C–J)

654 *Species examined.* (Table 1). Tribe Trechini, subtribe Trechodina: *Pachydesus* sp.,  
655 *Perileptus* sp., *Trechodes* sp., *Trechosiella scotti*. Tribe Trechini, subtribe Trechina:  
656 *Trechus humboldti*. Tribe Anillini: an undescribed form from Oregon, USA. Tribe  
657 Bembidiini: *Bembidion incrematum*, *Bembidion iridescens*, one of two species under  
658 the name *Bembidion kuprianovi*, *Bembidion* sp. nr. *transversale*, *Bembidion sejunctum*,  
659 *Bembidion zephyrum*, and an undescribed species of *Lionepha*. Tribe Pogonini:  
660 *Diplochaetus planatus*. Tribe Tachyini: *Mioptachys flavicauda*, *Paratachys* sp. 1,  
661 *Paratachys* sp. 2, *Tachyta inornata*, and *Tachyura rapax*.

662 *Sperm overview.* Trechitae sperm vary dramatically in length, and this variation  
663 appears to depend on conjugation state (Table 2; Fig. 2). Trechitae sperm tend to be  
664 short to very long when singletons, moderately long generally when part of a  
665 conjugate with cementing material, or very long when involved in mechanical  
666 conjugation. Sperm total length ranges from as short as 100µm in an unidentified  
667 species of *Trechodes* to the longest known sperm in Carabidae found in the tachyine  
668 *Tachyta inornata* with its 3400µm-long sperm. Sperm length across Trechitae tends to  
669 be shorter than 1mm, and sperm seem to have increased in length in the tribe  
670 Pogonini and some members of the tribe Tachyini. Sperm heads in Trechitae are  
671 generally thin, tapered anteriorly and filamentous (e.g., Fig. 7C). We were unable to  
672 consistently observe or confidently identify the heads of some trechite sperm  
673 following DAPI staining. Some trechite sperm show only one large region of  
674 fluorescence removed from either end of the sperm (e.g., *Mioptachys flavicauda* and  
675 all studied *Bembidion* species), which we suspect corresponds to their mitochondrial  
676 derivatives (Fig. 7C). Based on the sperm heads that we could visualize, head length  
677 ranges from very short and patrobine-like in *Trechus* and trechodine trechines to long  
678 or very elongate in *Diplochaetus* and tachyines (Figs. 7G–H). The heads of *Tachyta*  
679 *inornata*, *Tachyura rapax*, and *Paratachys* spp. are unusual for their elongate size and  
680 zig-zag shape (Figs. 7G–H).

681 Sperm conjugation is either absent or present in Trechitae (Table 2). Singleton  
682 sperm are found in some *Bembidion*, an undescribed anilline, trechodine trechines,  
683 *Trechus humboldti*, *D. planatus*, *M. flavicauda*, and the two *Paratachys* species we  
684 studied. The species that do make conjugates do so without an apparent  
685 spermatostyle. Conjugated sperm in the subfamily are either aggregates (Figs. 7D, E)  
686 or mechanical conjugates (Figs. 7G–J). Aggregate conjugates are found in some  
687 *Bembidion* and *Lionepha*. Within one species, *Bembidion* sp. nr. *transversale*, we had  
688 one specimen with evident aggregate conjugates, but in the other specimens we found  
689 only singleton sperm; the cause of these differences is not known (Supporting  
690 Information Spreadsheet S1). The heads of aggregate conjugates appear to be aligned  
691 in register and presumably are joined together via cementing material. Because these  
692 sperm are aligned parallel to one another and are joined together without a  
693 spermatostyle, the conjugate is approximately the same length as an individual sperm

694 cell. Mechanically conjugated sperm were observed in *Tachyta inornata* and *Tachyura*  
695 *rapax*, whose sperm form conjugates haphazardly via grappling onto one another (see  
696 Sperm motility observations).

697 *Within-genera variation.* We studied several different species of the large and complex  
698 genus *Bembidion* and found that sperm differ in total length and, perhaps, presence or  
699 frequency of conjugation. Because we did not focus on a group of closely related  
700 *Bembidion*, our data cannot speak to the usefulness of sperm-level variation in species  
701 delimitation in *Bembidion*.

702 *Reproductive tract observations.* The spermatheca of many trechites is small, compact,  
703 and frequently well sclerotized unlike most other ground beetles (Liebherr and Will,  
704 1998).

705 *Sperm motility observations.* The *Bembidion* sperm that we observed consisted of a mix  
706 of singleton sperm and conjugated sperm (Supporting Information MV3). *Bembidion*  
707 sperm move via helical klinotaxis, and their sperm conjugates swim notably faster  
708 than singleton sperm though we did not quantify this apparent difference in speed  
709 (Supporting Information MV3–MV4).

710 *Tachyta inornata* and *Tachyura rapax* sperm are singletons, but we observed  
711 them forming haphazard groups when released from the spermatheca or the male  
712 internal tract (Supporting Information MV12–MV14 for *T. inornata*). We observed the  
713 sperm of these beetles forming hairpin loops with their flagella (Figs. 7I–J) while  
714 undulating up and down and beating their flagella. Because of this motion and their  
715 long length, these sperm became net-like, and they began grappling onto adjacent  
716 sperm as they moved. It is difficult to fully characterize their behavior from our  
717 videos, but it appears as though sperm latch onto adjacent sperm and slide up their  
718 neighbor sperm. We observed live sperm of three male and one female *Tachyta*  
719 *inornata* and one male *Tachyura rapax*. Sperm in these species consistently formed  
720 hairpin loops leading to the formation of groups of sperm of varying size. Although the  
721 data are limited, we think that this is an example of secondary conjugation in  
722 Carabidae and a novel example of mechanical conjugation in animals. Mechanical  
723 conjugation is defined as a grouping of sperm that results from sperm haphazardly  
724 grappling onto one another and forming groups of variable size (Higginson and  
725 Pitnick, 2011), which is in keeping with our observations of sperm in these tachyines.  
726 Mechanical conjugation has been previously reported only from muroid rodents.  
727 Rodent sperm conjugates or trains have been the topic of much active research on the  
728 biomechanics of sperm (Fisher et al., 2014), and they possibly represent a case of  
729 sperm cooperation (e.g., Higginson and Pitnick, 2011; Immler et al., 2007; Moore,  
730 2002; Pizzari and Foster, 2008).

731

732 Subfamily Broscinae (Figs. 8A–C)

733 *Species examined.* (Table 1). *Broscodera insignis* and *Zacotus matthewsii*.

734 *Sperm overview.* Broscinae sperm are moderately long to long (Table 2). The sperm  
735 heads are visually indistinct from the remainder of the cell, but they are obvious with  
736 DAPI staining (Fig. 8C). The heads are filamentous and rod-like in *Z. matthewsii* (Fig.  
737 8C) and slender, elongate, and wavy in *Broscodera insignis* (Fig. 8A).

738 Broscinae are notable for making a spermatostyle without conjugation (Table  
739 2; Figs. 8A–C), which is a character combination that we have not observed outside of  
740 these two species. Broscinae make singleton sperm that are filamentous and are  
741 individually embedded in a cap-like or sleeve-like spermatostyle. The spermatostyle  
742 of *Z. matthewsii* is short, broad, and sperm-like in form (Fig. 8C) such that when sperm  
743 are joined to these spermatostyles, they resemble broad-headed sperm. The  
744 spermatostyle of *B. insignis* is sleeve-like and elongate (Fig. 8A–B).

745 *Reproductive tract observations.* The sperm of both species appear to become easily  
746 separated from their spermatostyles, and we were generally unable to find sperm  
747 joined to spermatostyles in our female preparations. We collected sperm from  
748 spermathecae of several female *Z. matthewsii* and found mostly sperm without  
749 spermatostyles.

750

751 Non-Harpalinae Carabidae *incertae sedis* (Figs. 8D–H)

752 *Species examined.* (Table 1). Tribe Gehringiini: *Gehringia olympica*. Tribe Hiletini:  
753 *Eucamaragnathus oxygonus*. Tribe Apotomini: *Apotomus* sp. Tribe Promecognathini:  
754 *Promecognathus laevissimus*. Tribe Psydrini: *Psydrus piceus*.

755 *Sperm overview.* Sperm in these beetles are filamentous and variable in length (Table  
756 2). We were unable to visualize the sperm heads of our *G. olympica* and *Apotomus* sp.  
757 sperm preparations. The heads of the remaining beetles are thin, tapered anteriorly  
758 and more-or-less indistinct from the rest of the cells (e.g., Figs. 8F–H). They are  
759 conspicuous with DAPI staining.

760 *Gehringia olympica*, *Eucamaragnathus oxygonus*, and *Apotomus* sp. all make  
761 singleton sperm (Table 2). We were unable to study the sperm of male *P. piceus*, and  
762 we found no evidence for conjugation in our preparation of a female *P. piceus*.  
763 *Promecognathus laevissimus* makes large conjugates by joining hundreds of sperm to a  
764 large corkscrew-shaped spermatostyle (Figs. 8D–E). The anterior end of the  
765 spermatostyle is spoon-shaped and without sperm (Fig. 8D). The spermatostyle  
766 appears to be composed of two parts: a central opaque rod with attached hyaline  
767 flanks (Fig. 8D). The sperm are more heavily distributed laterally on the hyaline flanks  
768 of the spermatostyle.

769 *Reproductive tract observations.* We recovered several intact and motile sperm  
770 conjugates from the spermatheca of our studied female *P. laevissimus* specimen.

771 *Sperm motility observations.* *Promecognathus laevissimus* conjugates move in the  
772 direction of their anterior end and spin in a helical fashion as they swim perhaps due  
773 to the shape of the corkscrew-shaped spermatostyle and the action of its hundreds of  
774 attached sperm (Supporting Information MV10–MV11).

775

776 Tribes Clivinini and Dyschiriini (Fig. 9)

777 *Species examined.* (Table 1). Tribe Clivinini: *Ardistomis obliquata*, *Ardistomis schaumii*,  
778 *Aspidoglossa subangulata*, *Paraclivina bipustulata*, *Clivina fossor*, *Schizogenius*  
779 *litigiosus*, and *Semiardistomis viridis*. Tribe Dyschiriini: *Akephorus obesus*, *Dyschirius*  
780 *thoracicus*, *Dyschirius dejeanii*, *Dyschirius globosus*, *Dyschirius haemorrhoidalis*,  
781 *Dyschirius pacificus*, and *Dyschirius tridentatus*.

782 *Sperm overview.* Sperm in Clivinini and Dyschiriini are diverse (Table 2). Sperm length  
783 varies from moderately short to long. Sperm heads are filamentous (tribe Clivinini) or  
784 short and generally broad and distinctively shaped (tribe Dyschiriini). We were  
785 consistently unable to identify the heads of clivinine sperm, and we did not collect any  
786 morphometric data on their sperm heads. Sperm heads in Dyschiriini are typically  
787 broad and asymmetrical and possibly species- or lineage-specific in shape (Figs. 9I–N).  
788 The putative mitochondrial derivatives of Clivinini but not Dyschiriini are conspicuous  
789 with DAPI staining and frequently form complex loops that can be mistaken for sperm  
790 heads.

791 All clivinines and dyschiriines studied to date make sperm conjugates (Table  
792 2). The sperm conjugates all include a spermatostyle, but there is notable variation  
793 within these groups at the level of the conjugate. The sperm conjugates of Clivinini  
794 tend to be either rod conjugates (Fig. 9C) or sheet conjugates (*cf.* Sasakawa 2007; Fig.  
795 9B). The spermatostyle varies substantially in length between Clivinini species as does  
796 the number of sperm in a conjugate (Table 2). The rod conjugates of Dyschiriini  
797 generally include less than 35 embedded sperm paired to spermatostyles of varying  
798 lengths (Figs. 9E–H). The sperm conjugates of Dyschiriini are unusual among carabids  
799 because they include so few sperm in a conjugate that the sperm can be easily counted  
800 (e.g., Figs. 9E–H). Perhaps because of their typically broad size, the sperm heads of  
801 Dyschiriini are arranged in a neat row within the spermatostyle (Fig. 9E) and are  
802 never placed parallel to one another.

803 *Unusual conjugate-level variation.* The sperm conjugates of some Clivinini and  
804 Dyschiriini are particularly unusual in that they include more spermatostyle than  
805 sperm. For example, the sperm conjugate of *A. subangulata* includes a large 6600µm  
806 spermatostyle, of which less than 1/6<sup>th</sup> of its length bears sperm; the rest of the  
807 spermatostyle is completely bare. Sperm in *A. subangulata* conjugates are distributed

808 on only one side of the spermatostyle further biasing the conjugate towards  
809 spermatostyle and less towards sperm. The sperm conjugates of *Clivina* are unusual in  
810 that their spermatostyles feature an expanded cavity where the sperm are sealed (Fig.  
811 9A), and based upon observations during dissections, it appears as though the  
812 conjugates are not motile. Upon rupturing the apical portion of the spermatostyle of  
813 *Clivina* conjugates, sperm were released via a narrow internal duct subtending the  
814 cavity.

815 *Within-species variation.* Many of the sperm traits we recorded for Clivinini and  
816 Dyschiriini sperm show high degrees of variance between preparations. We suspect  
817 that these large variances are largely symptomatic of our preparation of the sperm  
818 and sperm conjugates of these beetles, which are lengthy and easily damaged.

819 *Within-genera variation.* We studied more than one species of *Dyschirius*, *Clivina*, and  
820 *Ardistomis*. Species of *Clivina* and *Ardistomis* have largely similar sperm conjugates  
821 that differ slightly in the size and shape of the spermatostyle as well as in the lengths  
822 of their sperm and mitochondrial derivatives. *Dyschirius*, however, appears to be an  
823 especially interesting group of Carabidae in which to study the evolution of sperm  
824 form, sperm-female morphological coevolution, and in which to explore the possibility  
825 of using sperm form for species delimitation. We have studied a handful of different  
826 species of *Dyschirius*, and it is clear that sperm, particularly head shape, evolves  
827 rapidly within this group. The sperm heads are frequently complex in shape and  
828 notably different from one lineage to the next. Understanding the extent to which  
829 sperm head shape varies within *Dyschirius* species was not a goal of this study, and we  
830 note that these data are still preliminary.

831 *Reproductive tract observations.* The large sheet conjugates of some clivinines such as  
832 *A. subangulata* appear to occupy a large amount of space in the male reproductive  
833 tract and are relatively few in number. These large conjugates can be particularly  
834 difficult to extract undamaged.

835

836 Subfamily Scaritinae excl. the tribes Clivinini and Dyschiriini (Figs. 10A–D)

837 *Species examined.* (Table 1). Tribe Scaritini: *Haplotrachelus atropsis*, *Haplotrachelus cf.*  
838 *latesulcatus*, *Haplotrachelus* sp., *Scarites marinus*, *Scarites (Distichus)* sp., and *Scarites*  
839 *(Parallelomorphus)* sp. Tribe Pasimachini: *Pasimachus californicus*.

840 *Sperm overview.* Sperm in these groups are moderately short in total length (Table 2).  
841 The sperm are filamentous, and the heads are visually indistinct. This grouping of  
842 beetles make sperm with two regions of fluorescence following DAPI staining similar  
843 to Patrobini sperm and the sperm of the vast majority of Harpalinae that we studied  
844 (Fig. 10B–D). The sperm heads are inconspicuous and weakly fluorescent compared to  
845 the intensely fluorescent mitochondrial derivatives. The heads are small and compact  
846 (Figs. 10B–C), and the mitochondrial derivatives are significantly longer than the

847 sperm heads and average between 70–78 $\mu$ m in *P. californicus* and *S. marinus* (Fig.  
848 10D).

849 The species we studied in *Haplotrachelus*, *Pasimachus*, and *Scarites* all make  
850 sperm conjugates with small, cap-like spermatostyles or short rod-like spermatostyles  
851 (Table 2; Figs. 10A, D). Sperm are embedded in the spermatostyle via their small,  
852 compact heads; their flagella are unbounded. The spermatostyle is short and cap-like  
853 in *S. marinus* and in an unidentified species of *Scarites* subgenus *Parallelomorphus*.  
854 The remaining species that we studied all make rod spermatostyles that are more  
855 elongate. *Haplotrachelus* males make spermatostyles that are noticeably less rigid  
856 than the spermatostyles of other beetles in this group and their apices are flattened  
857 and spatulate.

858 *Within-species variation.* We found notable variation in sperm conjugate size between  
859 specimens of *P. californicus* (Supporting Information Spreadsheet S1). *Pasimachus*  
860 *californicus* sperm appear to be monomorphic, but their spermatostyles differ in  
861 average length between specimens. The spermatostyles also differ in shape with some  
862 spermatostyles appearing short and oblong or stretched posteriorly and elongated.  
863 The differences in spermatostyle size and shape influence the average number of  
864 sperm in a conjugate, and males show large variances in the average number of  
865 embedded sperm in their conjugates.

866 Sasakawa, (2009) studied the sperm of a Japanese species of *Scarites*, *S.*  
867 *terricola*, and found an unusual example of within-male variation in sperm. *Scarites*  
868 *terricola* males makes a short filamentous sperm morph that looks similar to the  
869 sperm of close relatives and is involved in conjugation, and a second sperm morph  
870 that is large and macrocephalic and always present as singletons. These sperm traits  
871 are distinct from other cases of sperm dimorphism in adaphagan beetles like those  
872 seen in many diving beetles (Higginson et al., 2012a) because the two different sperm  
873 forms of *S. terricola* do not combine to make a conjugate.

874 *Within-genera variation.* Large-bodied Scaritinae are frequently known to be  
875 morphologically homogenous and taxonomically challenging (e.g., Jeannel, 1941;  
876 Nichols, 1988). We studied three different species of the Old World scaritine genus  
877 *Haplotrachelus* and three likely distantly related species of the cosmopolitan genus  
878 *Scarites*. We observed minor differences in sperm length between these species  
879 compared to their congeners. *Haplotrachelus* species all make remarkably similar  
880 spermatostyles that differ slightly in size. The conjugates of the *Scarites* species we  
881 examined differ in shape, size, and number of included sperm.

882 *Sperm ultrastructure.* Witz, (1990) studied the sperm form of two species of  
883 *Pasimachus*, *P. strenuus* and *P. subsulcatus*. He found that *Pasimachus* sperm include a  
884 small, electron dense nucleus with two adjacent large mitochondrial derivatives with  
885 a herringbone pattern of paracrystalline material in cross section (Witz, 1990). Their  
886 sperm have a typical 9+9+2 arrangement of microtubules in the axoneme, and he was

887 unable to discern an acrosome in the mature sperm of *P. subsulcatus*. Witz, (1990) also  
888 found a series of small microtubules adjacent to the nucleus and developing  
889 mitochondria in *Pasimachus* spermatids and hypothesized that these are involved in  
890 organelle elongation in the mature sperm.

891 *Reproductive tract observations.* Males in these genera of Carabidae all have a blind sac  
892 termed a vesicula seminalis (Will et al., 2005) that branches off of the vas deferens  
893 prior to meeting the accessory glands. We ruptured the vesicula seminalis of our  
894 studied male beetles and consistently found it to contain numerous sperm conjugates.

895

896 Subfamily Rhysodinae (Fig. 10E)

897 *Species examined.* (Table 1). Tribe Clinidiini: *Clinidium* sp. nr. *guatemalenum*. Tribe  
898 Omoglymmiini: *Omoglymmius hamatus*.

899 *Sperm overview.* Rhysodinae sperm are moderately short and filamentous (Table 2;  
900 Fig. 10E). The sperm heads are thin and filamentous and visually indistinct from the  
901 rest of the cells. The heads are conspicuous with DAPI, and the mitochondrial  
902 derivatives of rhysodine sperm are not visible following DAPI staining.

903 Rhysodines make sperm conjugates with a relatively short and oblong rod-like  
904 spermatostyle (Table 2; Fig. 10E). The sperm are embedded in the spermatostyle via  
905 their heads with unbounded flagella.

906 *Reproductive tract observations.* Male rhysodines also have a vesicula seminalis (Will  
907 et al., 2005). We ruptured the vesicula seminalis of our studied male beetles and  
908 recovered numerous sperm conjugates. The accessory glands of rhysodines are  
909 unusual among carabids for their very elongate tips that are compacted inside their  
910 bodies (Will et al., 2005).

911

912 Subfamily Cicindelinae (Figs. 10F–G)

913 *Species examined.* (Table 1). Tribe Amblycheilini: *Omus audouini* and *Omus dejeanii*.  
914 Tribe Cicindelini: *Brasiella wickhami* and *Cicindela haemorrhagica*. Tribe  
915 Megacephalini: *Tetracha carolina*.

916 *Sperm overview.* Sperm in Cicindelinae are short and filamentous with little variation  
917 in length across the group (Table 2; Fig. 4A). The heads are filamentous, tapered  
918 anteriorly, and visually indistinct from the remainder of the cells. DAPI staining  
919 typically reveals one large region of fluorescence nearly two-thirds of the length of the  
920 sperm or more, sometimes with a more or less isolated small, lanceolate region of  
921 weak fluorescence apically (Fig. 10F–G). Werner, (1965) studied the sperm of a  
922 European tiger beetle, *Cicindela campestris*, using TEM and discovered that the



923 nucleus of their sperm runs parallel to the axoneme and the mitochondrial derivatives  
924 similar to some Harpalinae (Dallai et al., 2019). Werner, (1965) also found that the  
925 nucleus ends before the mitochondrial derivatives and other axonemal structures. We  
926 suspect that with DAPI staining and light microscopy, we are visualizing both the  
927 mitochondrial derivatives and the nucleus of tiger beetle sperm (Fig. 10F–G). Because  
928 tiger beetles may all possess a nucleus that runs parallel to their axoneme similar to *C.*  
929 *campestris* and because we could not easily identify a gap in fluorescence between the  
930 mitochondrial derivatives and the nucleus, we did not record sperm head  
931 measurements of our tiger beetle sperm preparations. The mitochondrial derivatives  
932 are filamentous and intensely fluorescent following DAPI staining. They range in  
933 length from 71µm in *C. haemorrhagica* to 110µm in *O. dejeanii*.

934 All Cicindelinae studied to date make only singleton sperm, and we have seen  
935 no evidence of spermatostyle production in any cicindeline preparation (Table 2).

936 *Within-genera variation.* We studied two species of the North American genus *Omus*  
937 from the Pacific Northwest, *O. dejeanii* and *O. audouini*. The sperm of the two species  
938 differ very slightly in total length and length of their mitochondrial derivatives.

939 *Reproductive tract observations.* Perhaps because of their small sperm and lack of  
940 conjugation, we consistently found the seminal vesicles of male Cicindelinae to be  
941 filled with very large quantities of individual sperm.

942

943 Subfamily Paussinae (Figs. 10H–K)

944 *Species examined.* (Table 1). Tribe Metriini: *Metrius contractus*. Tribe Ozaenini:  
945 *Goniotropis parca*, *Ozaena* sp., and *Pachyteles* sp. Tribe Paussini: *Cerapterus* sp.,  
946 *Paussus cucullatus*, and an unidentified species of *Paussus* (*Bathypaussus*).

947 *Sperm overview.* Sperm in Paussinae (Table 2) are filamentous and short when  
948 conjugated (Fig. 10H–J) or filamentous and moderately long when singletons (Fig.  
949 10K). The sperm of *Goniotropis parca* is currently the shortest known sperm for the  
950 family Carabidae (Table 2). The heads of paussine sperm are thread-like and tapered  
951 anteriorly or slightly thickened and relatively short as in *Metrius contractus* (Figs.  
952 10H–K). The heads are conspicuous with DAPI staining as a single region of  
953 fluorescence. The mitochondrial derivatives are not obvious following DAPI staining.

954 Paussines either make sperm conjugates or singleton sperm (Table 2). *Metrius*  
955 *contractus* and *Goniotropis parca* package their sperm into sperm conjugates with a  
956 moderately short rod-like spermatostyle (Figs. 10H–J). Species of the tribe Paussini,  
957 which include many obligate ant nest parasites, were found to make only singleton  
958 sperm (Fig. 10K). We only sampled a single female of *Pachyteles* and *Ozaena*, and we  
959 were unable to determine if they make conjugates. The sperm of *M. contractus* and *G.*  
960 *parca* are embedded in the spermatostyle via their heads with their flagella

961 unbounded. Sperm appear to be distributed on all sides of the spermatostyle in the  
962 conjugates of *M. contractus* (Fig. 10H), but in *Goniotropis parca*, the sperm are  
963 generally located laterally on the spermatostyle with a prominent bare region  
964 medially (Fig. 10J).

965 *Within-species variation.* The sperm conjugates of *Metrius contractus* show high levels  
966 of polymorphism in size between specimens (Fig. 10I), but their sperm appear to be  
967 monomorphic. Because sperm are distributed throughout the vast majority of the  
968 length of the spermatostyle, these conjugates also vary in the number of included  
969 sperm. *Goniotropis parca* males, similarly, have variation between specimens in  
970 conjugate size with monomorphic sperm, but this variation is smaller than what we  
971 have observed in *M. contractus*.

972 *Within-genera variation.* We studied two species of the obligate ant-parasite genus  
973 *Paussus*, *P. cucullatus* (subgenus *Hylotorus*) and an unidentified species of the  
974 subgenus *Bathypaussus*. The sperm of these two species differ slightly in total length  
975 and head length. We also observed rather different sperm lengths but not head  
976 lengths between our specimens of *P. cucullatus* from two different populations  
977 (Supporting Information Table S2).

978 *Reproductive tract observations.* Male paussines all have a blind sac termed a vesicula  
979 seminalis (Will et al., 2005) that joins their vas deferens prior to its meeting with the  
980 accessory glands. We ruptured the vesicula seminalis of our studied male beetles and  
981 recovered numerous sperm conjugates.

982

983 Subfamily Brachininae (Figs. 11A–D)

984 *Species examined.* Tribe Brachinini: *Brachinus elongatulus*, *Brachinus ichabodopsis*,  
985 *Mastax* sp., *Pheropsophus* sp. 1, *Pheropsophus* sp. 2.

986 *Sperm overview.* Brachininae sperm are filamentous and short with little variation in  
987 sperm total length (Table 2). The sperm heads are generally short, tapered anteriorly,  
988 and visually indistinct from the rest of the cells. Following DAPI staining, Brachininae  
989 sperm show two regions of fluorescence: the large and intensely fluorescent  
990 mitochondrial derivatives and the notably fainter, small and compact sperm heads  
991 (Fig. 11B). The sperm heads are short and narrow, under 1 $\mu$ m in length and width.  
992 The mitochondrial derivatives vary slightly in length between species, but they are  
993 generally conspicuous following DAPI staining and measure two-thirds of the total  
994 length of the sperm or more (Fig. 11B).

995 Brachininae all make sperm conjugates with either a short, cap-like  
996 spermatostyle and/or a slender and elongate rod-like spermatostyle (Figs. 11A–D).  
997 The sperm are embedded in the spermatostyle via their heads with unbounded  
998 flagella. *Brachinus elongatulus* is unusual because males make two distinct sperm

999 conjugate morphs (Table 2; Fig. 11A). One of the sperm conjugate morphs of *B.*  
1000 *elongatulus* includes between 30–70 sperm joined to a small, cap-like spermatostyle.  
1001 The second conjugate morph of *B. elongatulus* is composed of hundreds of sperm,  
1002 which we were unable to estimate accurately, joined to an elongate, ribbon-like  
1003 spermatostyle. *Mastax* males make small conjugates with a cap-like spermatostyle  
1004 that resemble the small conjugate morph of *B. elongatulus*. The remaining brachinines  
1005 we studied make larger spermatostyles including the giant 41mm-long  
1006 spermatostyles of the large-bodied bombardier genus *Pheropsophus*. *Pheropsophus*  
1007 sperm conjugates currently hold the record for largest sperm conjugates in Carabidae  
1008 and are likely among the largest sperm conjugates known. The giant spermatostyles of  
1009 *Pheropsophus* are flexible and ribbon-like, forming numerous loops of varying sizes on  
1010 the slide (Figs. 11C–D). The sperm of *Pheropsophus* conjugates are regularly  
1011 distributed throughout the length of the spermatostyle. Although we cannot  
1012 accurately estimate the number of sperm in these giant conjugates, they likely include  
1013 thousands of sperm given the dense packing of sperm and the giant size of the  
1014 spermatostyle.

1015 *Within-species variation.* Our measurements of *Pheropsophus* sperm conjugates  
1016 include a high amount of variance, between 4–5mm, in spermatostyle length between  
1017 specimens. This variation in conjugate size may be accurate, but it may be an artifact  
1018 of our preparations caused by the large size of these otherwise thin structures.

1019 *Within-genera variation.* We studied two different, likely distantly related species of  
1020 the large complex genus *Brachinus* and found obvious differences in sperm form.  
1021 *Brachinus elongatulus* sperm differ from sperm in *B. ichabodopsis* in total length and  
1022 the size of their mitochondrial derivatives. *Brachinus elongatulus* make two distinct  
1023 sperm conjugates whereas *B. ichabodopsis* makes a single conjugate morph with a  
1024 very slender elongate spermatostyle that does not resemble the spermatostyle of  
1025 either conjugate morph in *B. elongatulus*.

1026

1027 Subfamily Harpalinae (Figs. 11E–K; 12B–F)

1028 *Species examined.* Tribe Abacetini: *Abacetus* sp., *Stolonis intercepta*, and *Stolonis* sp.  
1029 Tribe Anthiini: *Anthia (Termophilum)* sp. Tribe Catapiesisini: *Catapiesis* sp. Tribe  
1030 Chlaeniini: *Chlaenius cumatilis*, *Chlaenius glaucus*, *Chlaenius harpalinus*, *Chlaenius*  
1031 *leucoscelis*, *Chlaenius prasinus*, *Chlaenius ruficauda*, *Chlaenius sericeus*, and *Chlaenius*  
1032 *tricolor*. Tribe Ctenodactylini: *Leptotrachelus* sp. Tribe Cyclosomini: *Tetragonoderus*  
1033 *fasciatus* and *Tetragonoderus* sp. nr *latipennis*. Tribe Dryptini: *Drypta* sp. Tribe  
1034 Galeritini: *Galerita atripes*, *Galerita bicolor*, *Galerita forreri*, and *Galerita lecontei*. Tribe  
1035 Graphipterini: *Cycloloba* sp. and *Graphipterus* sp. Tribe Harpalini: *Anisodactylus*  
1036 *alternans*, *Anisodactylus anthracinus*, *Anisodactylus similis*, *Bradycellus* sp. 1,  
1037 *Bradycellus* sp. 2, *Discoderus* sp., *Euryderus grossus*, *Harpalus affinis*, *Polpochila erro*,  
1038 *Selenophorus* sp., *Stenolophus* sp., and *Stenomorphus convexior*. Tribe Helluonini:

1039 *Helluomorphoides papago* and *Macrocheilus* sp. Tribe Lachnophorini: *Ega sallei*,  
1040 *Lachnophorus* sp. nr. *elegantulus*, and *Lachnophorus elegantulus*. Tribe Lebiini: *Agra*  
1041 sp. 1, *Agra* sp. 2, *Apenes lucidula*, *Calleida bella*, *Calleida jansoni*, *Calleida decora*,  
1042 *Cymindis punctifera*, *Cymindis punctigera*, an unidentified member of the *basipunctata*-  
1043 group of *Cymindis* subgenus *Pinacodera*, *Lebia deceptrix*, *Lebia subgrandis*, *Lebia*  
1044 *viridis*, *Phloeoxena nigricollis*, *Stenognathus quadricollis*, *Syntomus americanus*, and  
1045 *Thyreopterus flavosignatus*. Tribe Licinini: *Badister ferrugineus*, *Dicaelus suffusus*, and  
1046 *Diplocheila nupera*. Tribe Morionini: *Morion* sp. Tribe Odacanthini: *Colliuris*  
1047 *pensylvanica*. Tribe Oodini: *Anatrichis minuta*, *Oodes fluvialis*, and *Stenocrepis elegans*.  
1048 Tribe Panagaeini: *Panagaeus sallei*. Tribe Peleciini: *Disphaericus* sp. Tribe Perigonini:  
1049 *Perigona nigriceps*. Tribe Pentagonalicini: *Pentagonica* sp. Tribe Platynini: *Agonum*  
1050 *piceolum*, *Agonum muelleri*, an unidentified species of *Rhadine dissecta*-group, and  
1051 *Sericoda bembidioides*. Tribe Pseudomorphini: *Pseudomorpha* sp. Tribe Pterostichini:  
1052 *Abaris splendidula*, *Hybothecus flohri*, *Cyclotrachelus dejeanellus*, *Cyrtomoscelis* cf.  
1053 *dwesana*, *Pterostichus (Morphnosoma) melanarius*, *Pterostichus (Hypherpes) lama*,  
1054 *Pterostichus (Leptoferonia) infernalis*, *Poecilus laetulus*, and *Poecilus scitulus*. Tribe  
1055 Sphodrini: *Calathus peropacus* and *Synuchus dubius*. Tribe Zabryini: *Amara aenea* and  
1056 *Amara farcta*. Tribe Zuphiini: *Pseudaptinus horni*, *Pseudaptinus simplex*, and  
1057 *Pseudaptinus tenuicollis*.

1058 *Sperm overview*. The large subfamily Harpalinae, containing half of all carabid species,  
1059 have sperm that are filamentous and vary widely in length from short to long (Table  
1060 2). Instances of both short and long sperm occur repeatedly throughout the subfamily.  
1061 The sperm heads are typically inconspicuous and visually indistinct from the  
1062 remainder of the cells. Following DAPI staining, Harpalinae sperm show one or two  
1063 regions of fluorescence. The mitochondrial derivatives are large and fluoresce intensely  
1064 with DAPI staining (Fig. 11H) whereas the nuclei are weakly fluorescent, making  
1065 morphological observation of the heads difficult. There are several specimens for  
1066 which we were unable to clearly discern the head (41.5% of all Harpalinae  
1067 preparations studied). Of the sperm heads that we could observe, our data show that  
1068 Harpalinae sperm heads are short, commonly between 0.5–5.0 $\mu$ m in length (Table 2;  
1069 Fig. 11H). The heads are generally tapered anteriorly or weakly asymmetrical and  
1070 narrow, varying minimally in width.

1071 Sperm conjugation seems to be the rule across Harpalinae with only few  
1072 ambiguous exceptions (Table 2; Figs 3, 11E–K). Sperm conjugation involves a  
1073 spermatostyle, and the variation in conjugate shape and size across Harpalinae is  
1074 striking, with numerous species making particularly elongate spermatostyles. The  
1075 spermatostyle varies in total length from the short and cap-like spermatostyle of  
1076 *Chlaenius prasinus* (Chlaeniini) to the enormous rod-like spermatostyles of  
1077 *Pterostichus lama* (Pterostichini) and *Diplocheila nupera* (Licinini) that are among the  
1078 largest spermatostyles in Carabidae (Figs. 3–4). The spermatostyle varies dramatically  
1079 in shape with some species making corkscrew-shaped or spiral spermatostyles (e.g.,  
1080 *Anisodactylus alternans*, *Tetragonoderus fasciatus*; Fig. 11K), flat and ribbon-like

1081 spermatostyles (e.g., *Stenocrepis elegans*; Fig. 11I), slinky-shaped spermatostyles (e.g.,  
1082 *Chlaenius ruficauda*; Fig. 11G), or small and cap-like spermatostyles, in addition to  
1083 variations on the more common simple rod-like spermatostyle (Fig. 11E). The apex of  
1084 the spermatostyle shows a lot of variation and is frequently distinct in shape and/or  
1085 width from the remainder of the spermatostyle. The apex is frequently simply tapered  
1086 or gently expanded, but we have seen species with spermatostyles that are spoon-  
1087 shaped or spatulate apically (e.g., *Pterostichus nigrita* Hodgson et al., 2013, *A.*  
1088 *alternans*, *Cymindis punctigera*) or jagged and knife-like (*Poecilus* species).

1089 Harpalinae make either rod or sheet conjugates (Fig. 4). In sheet conjugates,  
1090 the sperm, including their flagella, are joined to the spermatostyle by hyaline material  
1091 (Figs. 11F, J–K; Dallai et al., 2019; Sasakawa, 2007). We have observed sheet  
1092 conjugates in various unrelated groups of ground beetles. Sheet conjugates occur in  
1093 members of the following tribes: Abacetini (e.g., *Abacetus* sp.), Chlaeniini (e.g., some  
1094 but not all *Chlaenius* we studied), Ctenodactylini (e.g., *Leptotrachelus* sp.), Cyclosomini  
1095 (e.g., *Tetragonoderus* spp.), Lebiini (e.g., *Calleida jansoni*, *Lebia* spp., and *Syntomus*  
1096 *americanus*), Lachnophorini (e.g., a Mexican species of *Lachnophorus*), and Harpalini  
1097 (e.g., *Discoderus* sp., *Stenolophus* sp., and *Stenomorphus convexior*). Most of the  
1098 Pterostichini we studied also make sheet conjugates. Males of the genus *Galerita* make  
1099 sperm conjugates that we scored as sheet conjugates. *Galerita* conjugates are unusual  
1100 in that the spermatostyles include a long groove that seems to be associated with  
1101 sperm placement (Fig. 12D), reminiscent of the sperm conjugates of some *Clivina*.  
1102 Typically sperm are distributed more or less evenly along the entire length of the  
1103 spermatostyle in Harpalinae. Sometimes sperm are more densely distributed along  
1104 the sides of the spermatostyle (common in sheet conjugates (Hodgson et al., 2013)) or  
1105 along particular stretches of the spermatostyle resulting in prominent bare regions  
1106 that are common posteriorly (e.g., the spermatostyle of *Euryderus grossus* is 2900µm  
1107 long but only 200–300µm of its length bears sperm). The number of sperm in a  
1108 conjugate varies dramatically within Harpalinae. Most of the Harpalinae we studied  
1109 make conjugates with between 30–1000 sperm in a conjugate. We were not always  
1110 able to estimate the number of sperm in Harpalinae conjugates particularly when the  
1111 conjugates were very large (e.g., the 9mm conjugates of *P. lama*).

1112 We found no unambiguous evidence that conjugation is missing in any of the  
1113 Harpalinae we studied. However, we were unable to discern some morphological  
1114 details of conjugation in some of our lower quality preparations. In our *Anthia* and  
1115 *Galerita* preparations, for example, it was difficult to identify whether sperm had  
1116 simply become detached from the spermatostyle or were not physically associated  
1117 with it in the first place.

1118 *Within-species variation.* Male Harpalinae frequently make large conjugates with large  
1119 spermatostyles. The spermatostyles are typically wider anteriorly than posteriorly  
1120 and frequently possess a long and thin tail that is easily broken. In several of our  
1121 harpaline preparations, we recorded large spermatostyle length variances between

1122 specimens of a given species. We suspect that some of the variation that we have  
1123 observed is due to our damaging these spermatostyles during slide preparation.

1124 *Within-genera variation.* We studied two or more species in several widely related  
1125 Harpalinae genera. Harpalinae sperm conjugates tend to be more morphologically  
1126 variable than sperm between species. Sperm frequently will differ slightly in total  
1127 length between species. For example, *Agonum piceolum* and *Agonum muelleri* make  
1128 sperm that differ slightly in length by nearly 20 $\mu$ m, but their conjugates are notably  
1129 different. The sperm conjugates of *A. muelleri* include a longer spermatostyle that is  
1130 straight and rigid and includes a small bare region apically. We found a similar pattern  
1131 in sperm and sperm conjugate variation among species of *Anisodactylus*, *Bradycellus*,  
1132 *Calleida*, *Galerita*, *Cymindis*, and *Lebia*.

1133 Conjugate type is typically stable within a genus, but some harpaline genera  
1134 include species that make either rod or sheet conjugates (e.g., *Chlaenius*, present  
1135 study; *Pterostichus*, Sasakawa, 2007). We had the opportunity to study several  
1136 different North American species of the large cosmopolitan ground beetle genus  
1137 *Chlaenius*. We studied eight different species of *Chlaenius* classified in 5 different  
1138 subgeneric groupings. Most studied species of *Chlaenius* make rod conjugates, but  
1139 *Chlaenius ruficauda* makes sheet conjugates. The spermatostyle is notably variable in  
1140 size and shape between species, and the range of variation observed in spermatostyle  
1141 length across *Chlaenius* is almost as extensive as the variation observed across  
1142 Carabidae as a whole (Table 2). The sperm of *Chlaenius* varies significantly in total  
1143 length and, to a lesser degree, in sperm head length. The monophyly of *Chlaenius*  
1144 subgeneric groups remains an open question, but it appears that sperm, particularly  
1145 sperm conjugates, evolve rapidly in *Chlaenius*.

1146 *Sperm ultrastructure.* Recently, Dallai et al., (2019) studied the sperm ultrastructure of  
1147 several *Pterostichus* species, *Amara aulica*, and *Demetrius atricapillus*. The sperm  
1148 nuclei of these species are long, thin, and parallel to their axonemes like the nucleus of  
1149 *Cicindela campestris* sperm (Dallai et al., 2019). If most Harpalinae sperm possess long  
1150 and thin nuclei like these species, then perhaps it is the shape and size of their nuclei  
1151 that explains the difficulty we had observing the sperm heads in many of our  
1152 Harpalinae preparations (Fig. 11H). Their sperm have a typical 9+9+2 axoneme  
1153 flanked by mitochondrial derivatives and small accessory bodies; their heads bear  
1154 small, flat acrosomes (Dallai et al., 2019). Sperm in these species are packaged into  
1155 sheet conjugates and are embedded laterally into the sidewall of the spermatostyle via  
1156 their heads; their flagella are located in chambers that are joined to the spermatostyle  
1157 by laminar extensions (Dallai et al., 2019).

1158 *Reproductive tract observations.* We collected sperm from female Harpalinae for  
1159 several of our slide preparations. We almost always found individual sperm and  
1160 collections of spermatostyles or intact conjugates in the spermathecae of females from  
1161 throughout our sampling. The spermatostyles of Harpalinae males are generally long,  
1162 and they tend to be compacted within the female's sperm storage organ. For example,

1163 male *Harpalus affinis* sperm conjugates include a long, slender, sickle-shaped  
1164 spermatostyle (Fig. 12E), and we recovered large haphazard spermatostyle masses  
1165 from the spermathecae of female *H. affinis* (Fig. 12F). Compacted masses of  
1166 spermatostyles like these were commonly observed near the entrance of the  
1167 spermatheca or the spermathecal duct with individual sperm predominately  
1168 occupying the apical regions of the spermatheca. These masses were frequently  
1169 difficult to break apart and mirrored the shape of the spermatheca.

1170         Some female harpaline ground beetles use different storage organs for  
1171 different parts of a male's sperm conjugate. *Galerita* females appear to use one storage  
1172 organ for sperm and another storage organ for the spermatostyles that males make  
1173 (Figs. 12A–C). We dissected females of two different *Galerita* species, and discovered  
1174 that the large balloon-shaped structure that has been called the spermatheca by  
1175 Liebherr and Will, (1998) held large numbers of bare spermatostyles (Fig. 12A) and  
1176 the notably smaller spherical structure termed a secondary spermathecal gland by  
1177 Liebherr and Will, (1998) contained only individual sperm (Fig. 12C). These two  
1178 storage sites are physically separated from one another and are connected via  
1179 separate ducts to a larger common duct that joins the bursa copulatrix (Fig. 12 A;  
1180 Liebherr and Will, 1998; Hunting, 2008). Nothing is known regarding sperm use by  
1181 *Galerita* females, but we speculate that conjugates arrive to the balloon-shaped  
1182 structure, dissociate or become dissociated from their sperm, and sperm travel or are  
1183 moved to the functional spermatheca. Near relatives of *Galerita* possess similar female  
1184 reproductive tract forms (Hunting, 2008), and it seems likely that this pattern of  
1185 decoupled sperm and spermatostyle storage applies more broadly.

1186 *Sperm motility observations.* *Agonum piceolum* sperm conjugates swim in a typical  
1187 helical fashion, and they appear to swim faster than individual sperm (Supporting  
1188 Information MV1–MV2).

1189

## 1190 **5. Discussion**

### 1191 *Trends in carabid sperm evolution*

1192         One of the obvious ways in which sperm vary is in their length, a trait which  
1193 may covary with conjugation. Long sperm have historically received much attention,  
1194 and long sperm can be ornaments evolving under sexual selection (Lüpold et al.,  
1195 2016). Various studies have shown that longer sperm are more costly to produce than  
1196 shorter sperm (e.g., Pitnick, 1996). Considering only this factor, we would expect that  
1197 through time sperm would evolve to become shorter (Parker, 1970; 1998). Sperm,  
1198 instead, show a wide range in lengths in response to a variety of post-mating selection  
1199 pressures (Lüpold and Pitnick, 2018). We found that carabid sperm vary in length  
1200 from 48–3400µm, with variation in either direction towards long or short sperm  
1201 occurring in several large groups of ground beetles, suggesting that sperm size is an

1202 evolutionarily labile trait (Figs. 2–4). Many species with singleton sperm tend to make  
1203 long sperm of over 1mm in length, and perhaps sperm length is correlated with  
1204 conjugation state or loss of the spermatostyle (Figs. 2–3; Higginson et al., 2012a).  
1205 Because the spermatostyle competes for space with sperm in male and female  
1206 reproductive tracts, it may be the case that loss of conjugation with a spermatostyle  
1207 allows for more space for sperm, which might allow for either longer sperm or more  
1208 numerous sperm. In diving beetles, sperm length does not correlate with conjugation  
1209 (Higginson et al., 2012a), and conjugation may have more to do with occupying a site  
1210 favorable for fertilization rather than conferring any motility advantages to sperm  
1211 (Higginson et al., 2012b).

1212 Drag and efficient sperm packaging for conjugation may explain why ground  
1213 beetle sperm are rarely broad-headed. The vast majority of carabid beetles studied  
1214 make filamentous sperm with visually indistinct heads that are usually no broader  
1215 than the remainder of the cell (e.g., Fig. 8F). Sperm head length varies from 0.5–  
1216 270 $\mu\text{m}$  (Fig. 4B), but most species have sperm heads that measure under 20 $\mu\text{m}$  (Table  
1217 2), suggesting that head length evolves much slower than sperm total length. Because  
1218 sperm live in a low Reynolds number environment where viscous forces dominate  
1219 over inertial forces (Vogel, 1994), drag is likely an important physical variable in  
1220 sperm evolution (e.g., Ishimoto and Gaffney, 2015). If drag is an important variable in  
1221 sperm evolution, you would expect sperm to be broad-headed only rarely (Humphries  
1222 and Evans, 2008). At the same time, the physical joining of sperm to each other or to a  
1223 spermatostyle might covary with head shape through time (Higginson and Pitnick,  
1224 2011). Higginson et al., (2012a) found that the gain or loss of broad-headed sperm  
1225 was evolutionarily correlated with qualitative changes to sperm conjugate type.  
1226 Unlike ground beetles, many diving beetles have broad-headed sperm, but diving  
1227 beetles do not make sperm conjugates with a spermatostyle (Higginson et al., 2012a).  
1228 Thick- or broad-headed sperm (1.0–6.3 $\mu\text{m}$ ) are found in only a few ground beetles  
1229 such as some *Dyschirini* (Figs. 9I–J, L–N), members of the genus *Omophron* (Figs. 6G,  
1230 I), genus *Trachypachus* (Fig. 5G), *Eucamaragnathus oxygonus* (Fig. 8H), and *Metrius*  
1231 *contractus* (Fig. 10H). Based on the taxonomic distribution of broad-headed sperm  
1232 (Fig. 4C), it seems likely that broad-headed sperm evolved from slender-headed  
1233 sperm only a few times in Carabidae. Sperm head width may be more constrained  
1234 functionally or developmentally than other aspects of sperm form. The scope of sperm  
1235 head width variation is limited, and head width generally varies little between closely  
1236 related species with narrow-headed sperm. Perhaps broad sperm heads are difficult  
1237 to produce or are evolutionarily unstable. Diversification models of diving beetle  
1238 sperm suggest that being broad-headed and single is an evolutionarily unstable state  
1239 for sperm (Higginson et al., 2012a). All ground beetle species with thickened or broad  
1240 heads make rod conjugates except for the singleton sperm of *Eucamaragnathus*  
1241 *oxygonus*. Sperm conjugate type may not covary with sperm head width in ground  
1242 beetles, but we surmise that the number of sperm in a conjugate depends on the form  
1243 of the sperm head. For instance, the asymmetrical and broad-headed sperm of  
1244 *Omophron* must stack and pair up in such a way to allow for the side bearing the



1245 flagellum to be lateral (Figs. 6G, I). Smaller heads might offer less drag, and it may be  
1246 possible to group together more sperm by their heads when they are small. Species  
1247 that make small-headed sperm (sperm head l x w under 0.5 $\mu$ m x 0.5 $\mu$ m) typically  
1248 make conjugates with large numbers of sperm. Whether sperm head width is  
1249 correlated with the number of sperm in a conjugate remains to be evaluated more  
1250 thoroughly.

#### 1251 *Trends in carabid sperm conjugate evolution*

1252 We identified several different qualitative types of sperm conjugates in ground  
1253 beetles (Figs. 2–3; Table 2). Within each conjugate type, we found variation in sperm  
1254 form, spermatostyle form, sperm number, and arrangement of sperm in a conjugate.  
1255 The different conjugate types therefore only capture a small amount of the continuum  
1256 of variation found in ground beetle sperm conjugates.

1257 Sperm conjugation with a spermatostyle appears to have been present early in  
1258 the history of Carabidae. Several studied species make only singleton sperm, but most  
1259 carabid beetles make sperm conjugates, and the distribution of sperm conjugates  
1260 suggests an early origin. Most early diverging lineages of ground beetles such as  
1261 Trachypachinae, Elaphrinae, and Carabinae (Maddison et al., 2009, Maddison et al.,  
1262 unpublished data) make rod conjugates with a spermatostyle and unbounded flagella  
1263 (Figs. 2, 5A–H). The one exception is subfamily Nebriinae, which make singleton  
1264 sperm (Figs. 6B–D). The exact position of Nebriinae is an outstanding question in  
1265 carabid systematics (Arndt et al., 2005; Maddison et al., 1999; 2009), and it may be  
1266 that the ancestor of all carabids made singleton sperm. However, wherever Nebriinae  
1267 might be placed, the extent of conjugates throughout carabids outside of Harpalinae  
1268 suggests that sperm conjugation was present early in the history of Carabidae, and is  
1269 ancestral for a majority of the family.

1270 Sperm conjugation in ground beetles almost always involves a spermatostyle,  
1271 and carabids with conjugated sperm tend to make either rod conjugates or sheet  
1272 conjugates (Figs. 2–3; Sasakawa, 2007). Sheet conjugates occur in several putatively  
1273 unrelated tribes of Harpalinae (e.g., Figs. 11F–G, J–K) and the tribe Clivinini (Figs. 9A–  
1274 B). If rod sperm conjugates are ancestral, this would mean that there have been many  
1275 independent transitions to sheet conjugates.

1276 The distribution of singleton and conjugated sperm across ground beetles  
1277 suggests that conjugation has been lost at least three times independently. Our low-  
1278 resolution phylogeny implies a loss of conjugation in Cicindelinae, Paussini, and at the  
1279 base of Trechitae (Fig. 2). Additional occurrences of singleton sperm are known from  
1280 other phylogenetically scattered lineages such as Apotomini, Hiletini, and Gehringiini  
1281 (Fig. 2; Maddison et al., 1999; 2009), but the lack of phylogenetic resolution for these  
1282 groups prohibits deeper insights into the gain or loss of conjugation in ground beetles.

1283           The subfamily Trechinae is one clade in which patterns of sperm evolution  
1284 appear evident, in part as there is a well-supported phylogenetic tree on which to  
1285 examine our results (Maddison et al., 2019). Trechinae males vary in sperm  
1286 conjugation presence and type (Figs. 2, 7). Some trechines make sperm conjugates  
1287 with small spermatostyles and short sperm (Figs. 7A–B), some make conjugates  
1288 without a spermatostyle (Figs. 7D–E), many make singleton sperm (Fig. 7C), and some  
1289 make long sperm that grapple onto one another, forming haphazard groupings of  
1290 sperm (Figs. 7G–J; mechanical conjugation). Ancestral Trechinae appear to have had  
1291 sperm conjugates with short sperm and simple rod-like spermatostyles as seen in the  
1292 Patrobini (Figs. 7A–B). We hypothesize that the spermatostyle and conjugation were  
1293 lost in several Trechitae before sperm got longer. Once singleton sperm became  
1294 longer, some Tachynini sperm gained a different type of conjugation that does not  
1295 include a spermatostyle or cementing material: their long sperm form large loops  
1296 (Figs. 7I–J) that turn while they swim, grabbing adjacent sperm in the process.  
1297 Because mechanical conjugation is thus far known only from muroid rodents and the  
1298 data we have are limited, further research is needed to confirm that this represents  
1299 another example of this phenomenon. We note that this sperm evolution model  
1300 assumes that the loss of sperm conjugation with a spermatostyle is more probable  
1301 than its being gained and that the mechanical conjugates of some tachyine carabids  
1302 are not homologous (as conjugates) with the rod conjugates of Patrobini or  
1303 Bembidiini.

#### 1304 *The spermatostyle as an understudied example of biological novelty*

1305           Conjugation with a spermatostyle is an interesting phenomenon because it  
1306 entails a trade-off between sperm and spermatostyles. The more resources in terms of  
1307 space, energy, and nutrients a male dedicates to spermatostyle production, the fewer  
1308 resources are available for sperm production. Reducing sperm production seemingly  
1309 reduces direct opportunities for paternal DNA to be passed to the next generation.  
1310 Thus, increasing spermatostyles could reduce potential fertilizations, unless  
1311 spermatostyles increase the per-sperm probability of successful fertilization. This  
1312 trade-off in resource utilization also extends to sperm storage in the female's  
1313 reproductive tract. In spite of this, most carabids make spermatostyles, and the  
1314 spermatostyle is frequently large and elaborate among many different species. We  
1315 know little about the chemical composition of the spermatostyle, but histological  
1316 evidence suggests that it is a matrix of proteins and carbohydrates (e.g., Hodgson et  
1317 al., 2013; Schubert et al., 2017). Males sometimes make sperm conjugates with bare  
1318 regions that lack sperm (e.g., Figs. 6F, 9A, 12E) suggesting that the spermatostyle is  
1319 more than just a device for joining together sperm.

1320           Evolution has explored a vast amount of morphological space in  
1321 spermatostyles in ground beetles, and our data suggest that spermatostyles evolve at  
1322 a much faster rate than sperm. Spermatostyles vary along several axes including size,  
1323 shape, texture, and thickness. These spermatostyle traits frequently vary between  
1324 species in a given higher-level taxonomic group (Fig. 2), and we suspect that there is

1325 much divergence and convergence in spermatostyle phenotype across Carabidae.  
1326 Spermatostyle production can also occur without sperm conjugation (Fig. 3), as in  
1327 Broscinae. Broscinae sperm are singleton, but their sperm are joined to individual  
1328 spermatostyles (Figs. 8A–C). If spermatostyles evolve faster than sperm, then closely  
1329 related species should vary more in spermatostyle and conjugate form than sperm  
1330 form. Our observations of multiple species within 20 genera (*Agonum*, *Agra*, *Amara*,  
1331 *Anisodactylus*, *Ardistomis*, *Brachinus*, *Bradycellus*, *Calleida*, *Carabus*, *Chlaenius*,  
1332 *Cymindis*, *Galerita*, *Haplotrachelus*, *Lachnophorus*, *Lebia*, *Pterostichus*, *Scarites*,  
1333 *Sphaeroderus*, *Stolonis*, *Tetragonoderus*) indicate that closely related species are more  
1334 likely to differ in spermatostyle form than sperm form similar to the findings of  
1335 Takami and Sota, (2007).

1336 We hypothesize that the spermatostyle can be an ornament evolving under  
1337 postmating sexual selection and that because it is non-cellular, it has been freed from  
1338 constraints that may be operating on sperm. Spermatostyles that contain large bare  
1339 regions are particularly interesting from a post-mating sexual selection perspective. If  
1340 sperm are like lottery tickets (Parker, 1970), this is akin to going to the racing downs  
1341 and spending lots on beer and little on tickets. It may be the case that large conjugates  
1342 with few sperm and large spermatostyles are similar to the exaggerated ornaments of  
1343 some *Drosophila* sperm (Lüpold and Pitnick, 2018; Lüpold et al., 2016). Perhaps the  
1344 spermatostyles modulate female mating behavior and are essential for successful  
1345 fertilization like the anucleate parasperm of some butterflies (Cook and Wedell, 1999;  
1346 Sakai et al., 2019).

1347 Other insects make sperm conjugates (e.g., Higginson and Pitnick, 2011;  
1348 Higginson et al., 2012a; 2015), but only carabids and some whirligig beetles are  
1349 known to make sperm conjugates with spermatostyles (Breland and Simmons, 1970;  
1350 Gustafson and Miller, 2017; Higginson et al., 2015). Whirligig beetles are close  
1351 relatives of ground beetles (McKenna et al., 2015; Maddison et al., 2009; Zhang et al.,  
1352 2018), but the exact phylogenetic position of whirligigs relative to ground beetles is  
1353 unclear. Whirligigs are usually placed with other aquatic adaphagan beetles in a clade  
1354 that is sister to ground beetles (McKenna et al., 2015; Zhang et al., 2018) or are  
1355 inferred to be the sister to all remaining Adephaga (Beutel and Roughley, 1988).  
1356 Evidence from whirligig systematics suggests that the spermatostyle is a derived trait  
1357 within the group (Gustafson, personal comm.; Gustafson and Miller, 2017; Higginson  
1358 et al., 2015), which implies that the spermatostyle in carabid beetles and whirligig  
1359 beetles is convergent.

### 1360 *Insight into sperm-female interactions*

1361 The female reproductive tract can be considered a morphological  
1362 representation of female sperm preference traits (Birkhead, 1998; Eberhard, 1996),  
1363 and we found preliminary evidence that females exert pressure on different  
1364 components of a male's sperm conjugate. We recovered sperm from the spermathecae  
1365 of several females, and sperm conjugates clearly arrive at the spermatheca before

1366 dissociating (Figs. 12E–J). This observation confirms that sperm compete with  
1367 spermatostyles for storage within a female’s reproductive tract. This means that a  
1368 male that invests more in spermatostyle size sacrifices spermathecal space for sperm.  
1369 Spermatostyles recovered from female preparations were typically thinner or  
1370 compacted compared to spermatostyles recovered from males’ seminal vesicles, and  
1371 most conjugated sperm in our female preparations had separated from their cohort  
1372 sperm (Figs. 12E–J). Because sperm conjugates arrive to the spermatheca but only  
1373 individual sperm can fertilize eggs, sperm must dissociate at some point (Higginson  
1374 and Pitnick, 2011). Because sperm dissociation occurs within the female, females may  
1375 be able to exert control over how quickly a male’s conjugated sperm dissociate  
1376 (Pitnick et al., 2009b). It is possible that males vary in how easily their conjugated  
1377 sperm dissociate.

1378         A more compelling piece of evidence for cryptic female choice operating on  
1379 sperm conjugates in ground beetles is the discovery that some females have separate  
1380 storage organs for different parts of the sperm conjugate. Some *Galerita* females have  
1381 a large balloon-shaped organ that stores spermatostyles and a small spherical  
1382 spermatheca for sperm (Figs. 12A–C). This discovery suggests that female *Galerita*  
1383 may have partially decoupled sperm evolution from spermatostyle evolution in males.  
1384 Very little is known regarding sperm use by *Galerita* females, but we suspect that  
1385 conjugates arrive to the balloon-shaped structure, dissociate or become dissociated  
1386 from their sperm, and the sperm travel or are moved to the functional spermatheca.  
1387 Near relatives of *Galerita* also possess a similar configuration of female reproductive  
1388 tract structures (Hunting, 2008), and it seems likely that this pattern of sperm use  
1389 applies more broadly.

1390

1391 *Are sperm conjugates greater than the sum of their parts?*

1392         Closely related ground beetles generally differ most at the level of the  
1393 conjugate rather than the sperm themselves. We found variation among ground beetle  
1394 sperm at multiple levels; in their sperm, spermatostyles, and how these are joined, i.e.,  
1395 the sperm conjugates (Fig. 2; Table 2). Conjugate-level variation likely evolves rapidly,  
1396 as indicated by the significant variation we observed at this level in our sampling. The  
1397 sperm of closely related species frequently differ only at the level of the conjugate. If  
1398 sperm conjugates change rapidly, you would predict to see within-species or within-  
1399 male variation in sperm conjugates. We found several instances of intraspecies or  
1400 intramale variation in sperm conjugate form throughout Carabidae (e.g., Fig. 5E), with  
1401 males making monomorphic sperm but packaging them into sperm conjugates that  
1402 overlap in size or with males making two sperm conjugate size classes (Takami and  
1403 Sota, 2007). *Brachinus elongatulus* males make monomorphic sperm but package  
1404 them into two morphologically distinctive conjugates (Fig. 11A). Conjugate size  
1405 polymorphism in ground beetles commonly entails variation in spermatostyle size,  
1406 but we also observed variation beyond conjugate size among closely related species.

1407 Ground beetle conjugates vary between species in the number of included  
1408 sperm, and conjugates include anywhere from a few to thousands of sperm (Table 2).  
1409 Because we often had difficulty estimating the number of included sperm in very large  
1410 conjugates, our data surely underreport the variation that is present in Carabidae. The  
1411 largest conjugates we observed were all conjugates with large spermatostyles. The  
1412 density and arrangement of sperm along the spermatostyle determines the number of  
1413 sperm cells in a given conjugate. As spermatostyles get larger, there is more space for  
1414 sperm attachment, which may correlate with sperm size and number of sperm  
1415 embedded in a conjugate. We generally found that larger spermatostyles included  
1416 more sperm and/or longer sperm, but there are many exceptions.

1417 Variation at the conjugate-level is usually the result of sperm number and  
1418 distribution patterns rather than orientation of sperm. In some closely related species  
1419 the conjugates have similar numbers of included sperm but different arrangements of  
1420 sperm. One such example comes from the sperm conjugates of *Dyschirius tridentatus*  
1421 and *D. dejeanii*. Both species make long rod-like spermatostyles of similar length with  
1422 sperm of similar length. However, in *D. tridentatus* about 35 sperm are distributed one  
1423 at a time throughout the length of the spermatostyle (Figs. 9F–G) whereas in *D.*  
1424 *dejeanii* sperm are all located on one end of the spermatostyle in a small cluster of  
1425 about 7 sperm (Fig. 9H).

1426 A likely functional consequence of variation in number and placement of sperm  
1427 in a conjugate is variation in motility, but motility alone likely does not explain the  
1428 variation observed in carabid conjugates (Pitnick et al., 2009a). Evidence from muroid  
1429 rodents and diving beetles indicates that sperm motility varies with conjugate form  
1430 (Fisher et al., 2014; Higginson et al., 2012a). Our preliminary data from *in vitro*  
1431 observation of ground beetle sperm suggests that motility differs among conjugate  
1432 forms (Supporting Information MV1–MV16). Although we did not systematically  
1433 investigate this topic enough to warrant firm conclusions, we suspect that sperm  
1434 conjugate motility is dependent on the composition and arrangement of their sperm  
1435 in a conjugate (Fisher et al., 2014) as well as interactions with the female reproductive  
1436 tract epithelium (Lüpold and Pitnick, 2018). Given the wide range of variation  
1437 observed in conjugate form, it seems unlikely that selection for variation in motility is  
1438 the only proximate mechanism behind the morphological diversification of ground  
1439 beetle sperm conjugates.

1440 Our data indicate that the ingredients used to make sperm conjugates likely  
1441 evolve slower than the arrangement of sperm in a conjugate. This pattern has also  
1442 been found in other animal groups with a history of sperm conjugation (Higginson  
1443 and Pitnick, 2011; Higginson et al., 2012a; Immler et al., 2007). The conclusion that  
1444 sperm and spermatostyles evolve slower than the joining of these two in a conjugate  
1445 aligns well with research on emergent patterns (Maynard Smith and Szathmary, 1995;  
1446 Michord, 2007; Parrish and Edelman-Keshet, 1999; Turing, 1952). Evolutionary  
1447 theory on emergence predicts that as a group becomes more inclusive, it will show  
1448 more variation (Novikoff, 1945). The highest levels of organization in emergent

1449 patterns contain the most variation (Novikoff, 1945). Our data suggest that there are  
1450 bottom-up trends in the evolution of emergent patterns where the parts (sperm and  
1451 spermatostyles) drive change in the group (conjugate) as well as top-down trends  
1452 where the group drives changes in the parts. Sperm conjugation evolution may follow  
1453 trends common to other emergent patterns in nature like schooling in fish, flocking in  
1454 birds, and colony-formation in unicellular organisms (Parrish and Edelstein-Keshet,  
1455 1999). If so, the study of sperm conjugation might yield new insights into the  
1456 evolution and development of complex novel traits.

1457

#### 1458 *Concluding remarks*

1459         The variation we observed in ground beetle sperm, spermatostyles, and sperm  
1460 conjugates hints at rapid evolution at the molecular level. Understanding how genetic  
1461 and epigenetic networks shape phenotype is a focus in the study of organic evolution  
1462 (Jablonka and Lamb, 2005) and has previously been identified as a high-priority  
1463 research goal in the study of post-mating sexual selection (Birkhead and Pizzari, 2002;  
1464 Lüpold and Pitnick, 2018). As genetic tools are ever improving and becoming more  
1465 accessible to non-model taxa (e.g., Ellegren, 2014; Russell et al., 2017), studies that use  
1466 ground beetles and their diverse sperm and genitalia to answer questions on the  
1467 genetics and epigenetics of post-mating sexual selection will soon be viable.

1468         There are, of course, gaps in our dataset as we were unable to study the sperm  
1469 form of carabid beetles from every major split in the tree of Carabidae. Sperm  
1470 morphology of unsampled early diverging carabids such as Southern Hemisphere  
1471 carabines (beetles of the genus *Pamborus* and *Ceroglossus*) and members of the tribes  
1472 Migadopini and Cicindini could be particularly valuable for inferring transitions in  
1473 sperm conjugate evolution. We did not study any male Psydrini, and we were also  
1474 unable to study the sperm of any Moriomorphini, which are the sister-group of the  
1475 large clade comprised of Brachininae and Harpalinae (Maddison et al., 2009;  
1476 Maddison and Ober, 2011). The study of Broscinae sperm may shed light on the  
1477 transition from sperm conjugation (with a spermatostyle) to singleton sperm (without  
1478 a spermatostyle). We suspect that the study of sperm in Broscinae worldwide could  
1479 yield new insights into the intersection of evolution and development of sperm,  
1480 spermatostyles, and sperm conjugation. In addition, advances in ground beetles  
1481 phylogenetics from genome and transcriptome sequencing stand to greatly improve  
1482 the accuracy of our inferences about sperm diversification.

1483         Our survey did not principally focus on female reproductive tract form, and we  
1484 acknowledge that we focused on only one side of the story (Ah-King et al., 2014). We  
1485 agree with Ah-King et al., (2014) that future studies that regularly incorporate female  
1486 reproductive tract data will be essential to a more holistic understanding of  
1487 morphological evolution in sperm. We look forward to future research that more fully

1488 incorporates female reproductive trait data in the study of post-mating sexual  
1489 selection in ground beetles.

1490

## 1491 **6. Acknowledgements**

1492 This study is a component of the PhD research of RAG. It is the result of  
1493 contributions from many people and organizations, and we earnestly hope that we  
1494 have not forgotten anyone here. For their love and support over many years, RAG  
1495 gives his deepest appreciation to his parents Roberto Gomez and Yvonne M. Soto-  
1496 Gomez and his siblings Miguel C. Gomez and Gabriela I. Gomez. For specimens, which  
1497 served as the bedrock of this study, we would like to thank Curt Harden, Olivia Boyd,  
1498 John Sproul, Kojun Kanda, and James Pflug. For their camaraderie and assistance in  
1499 the field near and far, we would like Kojun Kanda, James Pflug, Aaron Smith, Geovanni  
1500 M. Rodríguez Mirón, Andrew Johnston, Brian Raber, Marcin Kamiński, Daniel and  
1501 Jutah Bartsch, Ruth Müller, Danielle Mendez, Phil Schapker, Adam Chouinard, James  
1502 LaBonte, Olivia Boyd, Jason Schaller, Alan Yanahan, John Palting, Colin Schoeman,  
1503 Jason Denlinger, Dominique Gonçalves, Ana Gledis Miranda, Norina Vicente, the park  
1504 staff at Parque Nacional da Gorongosa in Mozambique, Lance Morrison, and Dabao Lu.  
1505 For their help facilitating the collection and/or study of material for this project, we  
1506 would like to give our thanks to Paulina Cifuentes-Ruiz, Jane Scott, Richard Boyd, the  
1507 Gomez-Soto family, Danielle Mendez, Alan Yanahan, Jason Schaller, Wendy Moore,  
1508 Eugene Hall, Jason Denlinger, Piotr Naskrecki and Chris Marshall. For valuable input  
1509 on taxon sampling, we would like to thank Kip Will and James Liebherr. For sharing  
1510 their valuable time and taxonomic expertise, we thank Danny Shpeley, Achille Casale,  
1511 Petr Burlisch, and Kip Will. For help with the staining, imaging, and slide preparation,  
1512 we would like to thank Barbara Taylor, Anne-Marie Girard, Grey Gustafson, Stephen  
1513 Baca, and Kelly Miller. For help with SEM and TEM we thank Peter and Rosemary at  
1514 the Core Labs at OSU. For their friendship and support, RAG thanks the Integrative  
1515 Biology graduate students. RAG offers deep thanks to his graduate committee at  
1516 Oregon State University for their mentorship and patience: James Strother, Virginia  
1517 Weis, Brian Sidlauskas, and Devlin Montfort. Scott Pitnick and Romano Dallai are  
1518 thanked for sharing their extensive knowledge of sperm biology and their  
1519 perspectives on the evolution of sperm form in ground beetles.

1520 We gratefully acknowledge the following sources of funding that allowed for us  
1521 to study carabid beetle sperm from throughout the tree by providing financial  
1522 assistance for travel for field work: the American Museum of Natural History  
1523 Theodore Roosevelt Memorial grant (Mexico 2016), Integrative Biology Zoology  
1524 Research Funds (Florida and Georgia, USA 2016), National Geographic Society early  
1525 career grant (Republic of South Africa 2018), and the Entomological Society of  
1526 America Systematics, Biodiversity, and Evolution division student research travel  
1527 award (Mozambique 2018).

1528            This project was partly funded by a National Science Foundation Graduate  
1529    Research Fellowship to RAG (DGE-1143953) and by the Harold E. and Leona M. Rice  
1530    Endowment Fund at Oregon State University.

1531



1532 **References**

- 1533 Ah-King, M., Barron, A. B., Herberstein, M. E. (2014). Genital Evolution: Why Are  
1534 Females Still Understudied? *PLoS Biology*, **12**: e1001851. doi:  
1535 <https://doi.org/10.1371/journal.pbio.1001851>
- 1536 Arndt, E., Beutel, R. G., Will, K. (2005). 7.8. Carabidae Latreille, 1802. In Beutel, R.G.,  
1537 Leschen, R.A.B. (Eds.), Handbook of Zoology. Band/Volume IV Arthropoda:  
1538 Insecta. Teilband/Part 38 Coleoptera, Beetles. Volume 1: Morphology and  
1539 Systematics (Archostemata, Adephaga, Myxophaga, Polyphaga partim) (pp.  
1540 119–146). Walter de Gruyter: Berlin, New York.
- 1541 Arnqvist, G., Rowe, L. (2005). Sexual Conflict. Princeton University Press, Princeton.
- 1542 Beutel, R. G., Roughley, R. E. (1988). On the systematic position of the family Gyrinidae  
1543 (Coleoptera: Adephaga). *Journal of Zoological Systematics and Evolutionary*  
1544 *Research*, **26**: 380–400.
- 1545 Birkhead, T. R. (1998). Cryptic female choice: Criteria for establishing female sperm  
1546 choice. *Evolution*, **52**: 1212–1218.
- 1547 Birkhead, T. R., Montgomerie, R. (2009). Three centuries of sperm research. In  
1548 Birkhead, T.R., Hosken, D.J., Pitnick, S. (Eds.), Sperm Biology, an Evolutionary  
1549 Perspective (pp. 1–42). Academic Press, San Diego.
- 1550 Birkhead, T. R., Pizzari, T. (2002). Postcopulatory sexual selection. *Nature Reviews and*  
1551 *Genetics*, **3**: 262–273.
- 1552 Bouix, G. (1961). Atypisme et degenerescence des spermatozoids dans le genre  
1553 *Carabus*. *Comptes Rendus De L'Academie Des Sciences*, **252**: 329–330.
- 1554 Bouix, G. (1963). Sur la spermatogenese des *Carabus*, modalite et frequence de la  
1555 spermigenese atypique. *Comptes Rendus De L'Academie Des Sciences*, **256**:  
1556 2698–2701.
- 1557 Bousquet, Y. (2012). Catalogue of Geadephaga (Coleoptera, Adephaga) of America,  
1558 north of Mexico. *Zookeys*, **245**: 1–1722.
- 1559 Breland, O. P., Simmons, E. (1970). Preliminary studies of the spermatozoa and the  
1560 male reproductive system of some whirligig beetles (Coleoptera: Gyrinidae).  
1561 *Entomological News*, **81**: 101–110.
- 1562 Cook, P. A., Wedell, N. (1999). Non-fertile sperm delay female remating. *Nature*, **397**:  
1563 486.
- 1564 Crowson, R. A. (1981). The biology of the Coleoptera. Academic Press, London, 802 pp.
- 1565 Dallai, R., Mercati, D., Giglio, A., Lupetti, P. (2019). Sperm ultrastructure in several  
1566 species of Carabidae beetles (Insecta, Adephaga) and their organization in  
1567 spermatozeugmata. *Arthropod Structure & Development*, **51**: 1–13.
- 1568 Darwin, C. (1871). The descent of man and selection in relation to sex. Reprinted, New  
1569 York: Modern Library.

- 1570 Eberhard, W. G. (1985). *Sexual Selection and Animal Genitalia*. Harvard University  
1571 Press, Cambridge, MA.
- 1572 Eberhard, W. G. (1996). *Female control: sexual selection by cryptic female choice*.  
1573 Princeton University Press, Princeton, NJ.
- 1574 Ellegren, H. (2014). Genome sequencing and population genomics in non-model  
1575 organisms. *Trends in Ecology & Evolution*, **29**: 51–63.
- 1576 Ferenz, H.-J. (1986). Structure and formation of sperm bundles in the carabid beetle  
1577 *Pterostichus nigrata*. In den Boer, P.J., Luff, M.L., Mossokowski, D., Weber, F.  
1578 (Eds.), *Carabid beetles, their adaptations and dynamics* (pp. 147–155). Gustav  
1579 Fischer, Stuttgart, New York.
- 1580 Ferraguti, M., Grassi, G., Erséus, C. (1989). Different models of tubificid  
1581 spermatozeugmata. *Hydrobiologia*, **180**: 73–82.
- 1582 Fisher, H. S., Giomi, L., Hoekstra, H. E., Mahadevan, L. (2014). The dynamics of sperm  
1583 cooperation in a competitive environment. *Proceedings of Royal Society. Series*  
1584 *B, Biological sciences*, **281**: 20140296.
- 1585 Gilson, G. (1884). Etude comparée de la spermatogénèse chez les arthropods. *La*  
1586 *Cellule*. I: 84–94.
- 1587 Gough, H. M., Duran, D. P., Kawahara, A. Y., Toussaint, E. F. A. (2018). A comprehensive  
1588 molecular phylogeny of tiger beetles (Coleoptera, Carabidae, Cicindelinae).  
1589 *Systematic Entomology*, **44**: 305–321.
- 1590 Gustafson, G. T., Miller, K. B. (2017). Systematics and evolution of the whirligig beetle  
1591 tribe Dineutini (Coleoptera: Gyrinidae: Gyrininae). *Zoological Journal of the*  
1592 *Linnean Society*, **XX**: 1–33.
- 1593 Higginson, D. M., Pitnick, S. (2011). Evolution of intra-ejaculate sperm interactions: do  
1594 sperm cooperate? *Biological Reviews*, **86**: 249–270.
- 1595 Higginson, D. M., Miller, K. B., Segraves, K. A., Pitnick, S. (2012). Convergence,  
1596 recurrence and diversification of complex sperm traits in diving beetles  
1597 (Dytiscidae). *Evolution*, **66**: 1650–1661.
- 1598 Higginson, D. M., Miller, K. B., Segraves, K. A., Pitnick, S. (2012) Female reproductive  
1599 tract form drives the evolution of complex sperm morphology. *Proceedings of*  
1600 *the National Academy of Sciences*, **109**: 4538–4543.
- 1601 Higginson, D. M., Badyaev, A. V., Segraves, K. A., Pitnick, S. (2015) Causes of  
1602 discordance between allometries at and above species-level: an example with  
1603 aquatic beetles. *The American Naturalist*, **186**: 176–186.  
1604 <https://doi.org/10.1086/682049>

- 1605 Hinchliff, C. E., Smith, S. A., Allman, J. F., Burleigh, J. G., Chaudhary, R., Coghill, L. M.,  
1606 Crandall, K. A., Deng, J., Drew, B. T., Gazis, R., Gude, K., Hibbett, D. S., Katz, L. A.,  
1607 Laughinhouse, H. D., McTavish, E. J., Midford, P. E., Owen, C. L., Ree, R. H., Rees, J.  
1608 A., Soltis, D. E., Williams, T., Cranston, K. A. (2015). Synthesis of phylogeny and  
1609 taxonomy into a comprehensive tree of life. *Proceedings of the National*  
1610 *Academy of Sciences*, **112**: 12764–12769.  
1611 <https://doi.org/10.1073/pnas.1423041112>
- 1612 Hodgson, A. N., Ferenz, H.-J., Schneider, S. (2013). Formation of sperm bundles in  
1613 *Pterostichus nigrata* (Coleoptera: Carabidae). *Invertebrate Reproduction &*  
1614 *Development*, **57**: 120–131.
- 1615 Holman, L., Snook, R. R. (2006). Spermicide, cryptic female choice and the evolution of  
1616 sperm form and function. *Journal of Evolutionary Biology*, **19**: 1660–1670.
- 1617 Hosken, D. J., Stockley, P. (2004). Sexual selection and genital evolution. *Trends in*  
1618 *Ecology and Evolution*, **19**: 87–93.
- 1619 Humphries, S., Evans, J. P. (2008). Sperm competition: linking form to function, *BMC*  
1620 *Evolutionary Biology*, **8**: 319.
- 1621 Hunting, W. (2008) Female reproductive system of the tribe Galeritini (Coleoptera:  
1622 Carabidae): structural features and evolution. *Annals of Carnegie Museum*,  
1623 **77**(1): 229–242 doi: [10.2992/0097-4463-77.1.229](https://doi.org/10.2992/0097-4463-77.1.229)
- 1624 Immler, S., Moore, H. D., Breed, W. G., Birkhead, T. R. (2007). By Hook or by Crook?  
1625 Morphometry, Competition and Cooperation in Rodent Sperm. *PLoS ONE* **2**(1):  
1626 e170. <https://doi.org/10.1371/journal.pone.0000170>
- 1627 Ishimoto, K., & Gaffney, E. A. (2015). Fluid flow and sperm guidance: a simulation  
1628 study of hydrodynamic sperm rheotaxis. *Journal of the Royal Society, Interface*,  
1629 **12**(106): 20150172.
- 1630 Jablonka, E., Lamb, M. (2006). *Evolution in Four Dimensions*, Cambridge, MA: MIT  
1631 Press.
- 1632 Jeannel, R. (1941). Coléoptères Carabiques. Faune de France Part 1, **39**: 1–571.
- 1633 Liebherr, J. K., Will, K. W. (1998). Inferring phylogenetic relationships within  
1634 Carabidae (Insecta, Coleoptera) from characters of the female reproductive  
1635 tract. In Ball, G., Casale, A., Vigna Taglianti, A. (Eds.), *Phylogeny and*  
1636 *Classification of Caraboidea* (Coleoptera: Adephaga) (pp. 107–170). Museo  
1637 Regionale di Scienze Naturali, Torino.  
1638
- 1639 Lorenz, W. (2005). Systematic list of extant ground beetles of the world (Insecta  
1640 Coleoptera “Geadephaga”: Trachypachidae and Carabidae incl. Paussinae,  
1641 Cicindelinae, Rhysodinae). Second edition. [Author], Titzing, Germany

- 1642 Lorenz, W. (2018). CarabCat: Global database of ground beetles (version Oct 2017). In  
1643 Roskov Y., Ower G., Orrell T., Nicolson D., Bailly N., Kirk P.M., Bourgoin T.,  
1644 DeWalt R.E., Decock W., De Wever A., Nieukerken E. van, Zarucchi J., Penev L.,  
1645 eds. (2018), Species 2000 & ITIS Catalogue of Life, 24th September 2018.  
1646 Digital resource at [www.catalogueoflife.org/col](http://www.catalogueoflife.org/col). Species 2000: Naturalis,  
1647 Leiden, the Netherlands. ISSN 2405–8858.
- 1648 Lüpold, S., Manier, M. K., Puniamoorthy, N., Schoff, C., Starmer, W. T., Buckley Luepold,  
1649 S. H., Belote, J. M., Pitnick, S. (2016). How sexual selection can drive the  
1650 evolution of costly sperm ornamentation. *Nature*, **533**: 535–538.
- 1651 Lüpold, S., Pitnick, S. (2018). Sperm form and function: what do we know about the  
1652 role of sexual selection. *Reproduction*, **155**: 229–243.
- 1653 Maddison, D. R., Baker, M. D., Ober, K. A. (1999). Phylogeny of carabid beetles as  
1654 inferred from 18S ribosomal DNA (Coleoptera: Carabidae). *Systematic*  
1655 *Entomology*, **24**: 103–138.
- 1656 Maddison, D. R., Ober, K. A. (2011). Phylogeny of minute carabid beetles and their  
1657 relatives based upon DNA sequence data (Coleoptera, Carabidae, Trechitae).  
1658 *ZooKeys*, **147**: 229–260.
- 1659 Maddison, D. R., Kanda, K., Boyd, O. F., Faille, A., Porch, N., Erwin, T. L., Roig-Juñent, S.  
1660 (2019). Phylogeny of the beetle supertribe Trechitae (Coleoptera: Carabidae):  
1661 Unexpected clades, isolated lineages, and morphological convergence.  
1662 *Molecular phylogenetics and Evolution*, **132**: 151–176.
- 1663 Maddison, D. R., Moore, W., Baker, M. D., Ellis, T. M., Ober, K. A., Cannone, J. J., Gutell, R.  
1664 R. (2009). Monophyly of terrestrial adepagan beetles as indicated by three  
1665 nuclear genes (Coleoptera: Carabidae and Trachypachidae). *Zoologica Scripta*,  
1666 **38**: 43–62.
- 1667 Martínez-Navarro, E. M., Galián, J., Serrano, J. (2005). Phylogeny and molecular  
1668 evolution of the tribe Harpalini (Coleoptera, Carabidae) inferred from  
1669 mitochondrial cytochrome-oxidase I. *Molecular Phylogenetics and Evolution*,  
1670 **35**: 127–146.
- 1671 Maynard Smith, J., Szathmary, E. (1995). The major transitions in evolution. Oxford  
1672 University Press.
- 1673 McCloy, R. A., Rogers, S., Caldon, C. E., Lorca, T., Castro, A., Burgess, A. (2014). Partial  
1674 inhibition of Cdk1 in G 2 phase overrides the SAC and decouples mitotic  
1675 events. *Cell Cycle*, **13**: 1400–1412.
- 1676 McKenna, D. D., Wild, A. L., Kanda, K., Bellamy, C. L., Beutel, R. G., Caterino, M. S.,  
1677 Farnum, C. W., Hawks, D. C., Ivie, M. A., Jameson, M. L., Leschen, R. A. B.,  
1678 Marvaldi, A. E., McHugh, J. V., Newton, A. F., Robertson, J. A., Thayer, M. K.,

- 1679 Whiting, M. F., Lawrence, J. F., Ślipiński, A., Maddison, D. R., Farrell, B. D. (2015)  
1680 The beetle tree of life reveals that Coleoptera survived end-Permian mass  
1681 extinction to diversify during the Cretaceous terrestrial revolution. *Systematic*  
1682 *Entomology*, **40**: 835–880.
- 1683 Michord, R.E. (2007). Evolution of individuality during the transition from unicellular  
1684 to multicellular life. *Proceedings of the National Academy of Sciences*, **104**:  
1685 8613–8618.
- 1686 Miller, K. B., Bergsten, J. (2014). Predaceous diving beetle sexual systems. In Yee, D.A.  
1687 (Ed.), *Ecology, Systematics, and Natural History of Predaceous Diving Beetles*  
1688 (Coleoptera: Dytiscidae) (pp. 199–234). Springer, New York.
- 1689 Miller, G. T., Pitnick, S. (2002). Sperm-female coevolution in *Drosophila*. *Science*, **298**:  
1690 1230–1233.
- 1691 Moore, H., Dvůráková, K., Nicholas, J., Breed, W. (2002). Exceptional sperm  
1692 cooperation in the wood mouse. *Nature*, **418**: 174–177.
- 1693 Moore, W. (2008). Phylogeny of Western Hemisphere Ozaenini (Coleoptera:  
1694 Carabidae: Paussinae) based on DNA sequence data. *Annals of Carnegie*  
1695 *Museum*, **77**: 79–92.
- 1696 Nichols, S. (1988). Systematics and biogeography of West Indian Scaritinae  
1697 (Coleoptera: Carabidae). (Unpublished Ph.D. thesis). Ithaca, New York: Cornell  
1698 University.
- 1699 Novikoff, A. B. (1945). The concept of integrative levels and biology. *Science*, **101**:  
1700 209–215.
- 1701 Ober, K. A. (2002). Phylogenetic relationships of the carabid subfamily Harpalinae  
1702 (Coleoptera) based on molecular sequence data. *Molecular Phylogenetics and*  
1703 *Evolution*, **24**: 228–248.
- 1704 Ober, K. A., Maddison, D. R. (2008). Phylogenetic relationships of tribes within  
1705 Harpalinae (Coleoptera: Carabidae) as inferred from 28S ribosomal DNA and  
1706 the wingless gene. *Journal of Insect Science*, **8**: 1–32.
- 1707 Osawa, S., Su, Z.-H., Imura, Y. (2004). Phylogeny and distribution of the subfamily  
1708 carabinae. In Osawa, S., Su, Z.-H., Imura, Y. (Eds.), *Molecular phylogeny and*  
1709 *evolution of carabid ground beetles* (pp. 25–32). Tokyo: Springer.
- 1710 Parker, G. A. (1970). Sperm competition and its evolutionary consequences. *Biological*  
1711 *Reviews*, **45**: 525–567.
- 1712 Parker, G. A. (1979). Sexual selection and sexual conflict. In Blum, M.S., Blum, N.A.  
1713 (Eds.), *Sexual Selection and Reproductive Competition in Insects* (pp. 123–  
1714 166). Academic Press, London.

- 1715 Parker, G. A. (1998). Sperm competition and the evolution of ejaculates: towards a  
1716 theory base. In Birkhead, T.R., Moller, A.P. (Eds.), Sperm Competition and  
1717 Sexual Selection (pp. 3–54). Academic Press, San Diego.
- 1718 Parker, G. A. (2005). Sexual conflict over mating and fertilization: an overview.  
1719 *Philosophical Transactions of the Royal Society B*, **361**: 235–259.
- 1720 Parrish, J. K., Edelstein-Keshet, L. (1999). Complexity, Pattern, and Evolutionary  
1721 Trade-Offs in Animal Aggregation. *Science*, **284**: 99–101.
- 1722 Pitnick, S. (1996). Investment in Testes and the Cost of Making Long Sperm in  
1723 *Drosophila*. *The American Naturalist*, **148**: 57–80.
- 1724 Pitnick, S., Hosken, D. J. (2010). Postcopulatory Sexual Selection. In Westneat, D.F., Fox,  
1725 C.W. (Eds.), Evolutionary Behavioral Ecology (pp. 379–399). Oxford University  
1726 Press, New York.
- 1727 Pitnick, S., Hosken, D. J., Birkhead, T. R. (2009). Sperm morphological diversity. In  
1728 Birkhead, T.R., Hosken, D.J., Pitnick, S. (Eds.), Sperm Biology, an Evolutionary  
1729 Perspective (pp. 69–149). Academic Press, San Diego.
- 1730 Pitnick, S., Wolfner, M. F., Suarez, S. (2009). Ejaculate-female and sperm-female  
1731 interactions. In Birkhead, T.R., Hosken, D.J., Pitnick, S. (Eds.), Sperm Biology, an  
1732 Evolutionary Perspective (pp. 247–304). Academic Press, San Diego.
- 1733 Pizzari, T., Foster, K. R. (2008). Sperm Sociality: Cooperation, Altruism, and Spite. *PLoS*  
1734 *Biol* **6**(5): e130. <https://doi.org/10.1371/journal.pbio.0060130>
- 1735 Rasband, W. S. (2012). ImageJ, version 1.43u. National Institutes of Health, Bethesda,  
1736 MD.
- 1737 Robertson, J. A., Moore, W. (2016). Dissecting the species groups of *Paussus* L.  
1738 (Carabidae: Paussinae): unraveling morphological convergence associated with  
1739 myrmecophilous life histories. *Systematic Entomology*. DOI:  
1740 10.1111/sysen.12205
- 1741 Russell, J. J., Theriot, J. A., Sood, P., Marshall, W. F., Landweber, L. F., Fritz-Laylin, L.,  
1742 Polka, J. K., Oliferenko, S., Gerbich, T., Gladfelter, A., Umen, J., Bezanilla, M.,  
1743 Lancaster, M. A., He, S., Gibson, M. C., Goldstein, B., Tanaka, E. M., Hu, C.-K.,  
1744 Brunet, A. (2017). Non-model model organisms. *BMC Biology*, **15**: 55.
- 1745 Sakai, H., Oshima, H., Yuri, K., Gotoh, H., Daimon, T., Yaginuma, T., Sahara, K., Niimi, T.  
1746 (2019). Dimorphic sperm formation by *Sex-lethal*. *Proceedings of the National*  
1747 *Academy of Sciences*, **116**: 10412–10417.
- 1748 Sasakawa, K. (2007). Sperm bundle and reproductive organs of carabid beetles tribe  
1749 Pterostichini (Coleoptera: Carabidae). *Naturwissenschaften*, **94**: 384–391.

- 1750 Sasakawa, K., Toki, W. (2008). A new record, sperm bundle morphology and  
1751 preliminary data on the breeding type of the ground beetle *Jujiroa estriata*  
1752 Sasakawa (Coleoptera: Carabidae: Platynini). *Entomological Science*, **11**: 415–  
1753 417.
- 1754 Sasakawa, K. (2009). Marked sperm dimorphism in the ground beetle *Scarites*  
1755 *terricola*: a novel type of insect sperm polymorphism. *Physiological*  
1756 *Entomology*, **34**: 387–390.
- 1757 Schärer, L., Littlewood, D. T. J., Waeschenbach, A., Yoshida, W., Vizoso, D. B. (2011).  
1758 Mating behavior and the evolution of sperm design. *Proceedings of the National*  
1759 *Academy of Sciences*, **108**: 1490–1495.
- 1760 Schmoll, T., Sanciprian, R., Klevne, O. (2016). No evidence for effects of formalin  
1761 storage duration or solvent medium exposure on avian sperm morphology.  
1762 *Journal of Ornithology*, **157**: 647.
- 1763 Schubert, L. F., Krüger, S., Moritz, G. B., Schubert, V. (2017). Male reproductive system  
1764 and spermatogenesis of *Limodromus assimilis* (Paykull 1790). PLoS ONE, **12**:  
1765 e0180492. <https://doi.org/10.1371/journal.pone.0180492>
- 1766 Sivinski, J. (1984). Sperm in competition. In R.L. Smith (Ed.), *Sperm Competition and*  
1767 *the Evolution of Animal Mating Systems* (pp. 85–115). Academic Press, New  
1768 York.
- 1769 Taggart, D. A., Johnson, J. L., O'Brien, H. P., Moore, H. D. M. (1993). Why do  
1770 spermatozoa of American Marsupials form pairs? A clue from the analysis of  
1771 sperm-pairing in the epididymis of the Grey Short-Tailed Opossum,  
1772 *Monodelphis domestica*. *The Anatomical Record*, **236**: 465–478.
- 1773 Takami, Y., Sota, T. (2007). Sperm competition promotes diversity of sperm bundles in  
1774 *Ohomopterus* ground beetles. *Naturwissenschaften*, **94**: 543–550.
- 1775 Turing, A. M. (1952). The Chemical Basis of Morphogenesis. *Philosophical*  
1776 *Transactions of the Royal Society of London. Series B, Biological Sciences*, **237**:  
1777 37–72.
- 1778 Thornhill, R., Alcock, J. (1983). *The evolution of insect mating systems*. Harvard  
1779 University Press, Cambridge, MA.
- 1780 van der Horst, G., Maree, L. (2010). SpermBlue®: A new universal stain for human and  
1781 animal sperm which is also amenable to automated sperm morphology  
1782 analysis, *Biotechnic & Histochemistry*, **84**(6): 299-308. doi:  
1783 [10.3109/10520290902984274](https://doi.org/10.3109/10520290902984274)
- 1784 Vogel, S. (1994). *Life in Moving Fluids: the Physical Biology of Flow*. Princeton  
1785 University Press.
- 1786 Vogler, A. P., Pearson, D. L. (1996). A molecular phylogeny of tiger beetles  
1787 (Cicindelinae): congruence of mitochondrial and nuclear rDNA data sets.  
1788 *Molecular Phylogenetics and Evolution*, **6**: 321–328.

- 1789 Werner, G. (1965). Untersuchungen über Die Spermiogenese Beim Sandläufer,  
1790 *Cicindela campestris* L.Z. *Zeitschrift für Zellforschung und Mikroskopische*  
1791 *Anatomie. Abteilung Histochemie*, **66**: 255–275.
- 1792 Will, K. W., Liebherr, J. K., Maddison, D. R., Galián, J. A. (2005). Absence asymmetry: the  
1793 evolution of monorchid beetles (Insecta: Coleoptera: Carabidae). *Journal of*  
1794 *morphology*, **264**: 75–93.
- 1795 Will, K. W., Gill, A. S. (2008). Phylogeny and classification of *Hypherpes auctorum*  
1796 (Coleoptera: Carabidae: Pterostichini: *Pterostichus*). *Annals of Carnegie*  
1797 *Museum*, **77**: 93–127.
- 1798 Witz, B. W. (1990). Comparative ultrastructural analysis of spermatogenesis in  
1799 *Pasimachus subsulcatus* and *P. strenuus* (Coleoptera: Carabidae). *Invertebrate*  
1800 *Reproduction and Development*, **18**: 197–203.
- 1801 Zhang, S.-Q., Che, L.-H., Li, Y., Liang, D., Pang, H., Ślipiński, A., Zhang, P. (2018).  
1802 Evolutionary history of Coleoptera revealed by extensive sampling of genes  
1803 and species. *Nature communications*, **9**: 205.



**Table 1.** Taxon and specimen sampling for sperm data.

|                | Tribe         | Genus               | Species                            | # male | # female | total (n) |
|----------------|---------------|---------------------|------------------------------------|--------|----------|-----------|
| Carabinae      | Carabini      | <i>Calosoma</i>     | <i>C. peregrinator</i>             | 2      | -        | 2         |
| Carabinae      | Carabini      | <i>Carabus</i>      | <i>C. nemoralis</i>                | 1      | -        | 1         |
| Carabinae      | Carabini      | <i>Carabus</i>      | <i>C. taedatus</i>                 | 1      | -        | 1         |
| Carabinae      | Cydrini       | <i>Cydrus</i>       | <i>C. tuberculatus</i>             | -      | 1        | 1         |
| Carabinae      | Cydrini       | <i>Scaphinotus</i>  | <i>S. marginatus</i>               | 1      | 1        | 2         |
| Carabinae      | Cydrini       | <i>Sphaeroderus</i> | <i>S. schaumii</i>                 | 2      | -        | 2         |
| Carabinae      | Cydrini       | <i>Sphaeroderus</i> | <i>S. stenostomus</i>              | 3      | 2        | 5         |
| Elaphrinae     | Elaphrini     | <i>Elaphrus</i>     | <i>E. purpuratus</i>               | 1      | 4        | 5         |
| Elaphrinae     | Elaphrini     | <i>Blethisa</i>     | <i>B. oregonensis</i>              | 2      | -        | 2         |
| Trachypachinae | Trachypachini | <i>Trachypachus</i> | <i>T. inermis</i>                  | 1      | -        | 1         |
| Trachypachinae | Trachypachini | <i>Trachypachus</i> | <i>T. slevini</i>                  | -      | 4        | 4         |
| Loricarinae    | Loricerini    | <i>Loricera</i>     | <i>L. decempunctata</i>            | 1      | 1        | 2         |
| Loricarinae    | Loricerini    | <i>Loricera</i>     | <i>L. foveata</i>                  | -      | 2        | 2         |
| Nebriinae      | Nebriini      | <i>Nebria</i>       | <i>N. brevicollis</i>              | 1      | -        | 1         |
| Nebriinae      | Notiophilini  | <i>Notiophilus</i>  | <i>N. sylvaticus</i>               | 3      | -        | 3         |
| Nebriinae      | Opisthiini    | <i>Opisthius</i>    | <i>O. richardsoni</i>              | 1      | 1        | 2         |
| Omophroninae   | Omophronini   | <i>Omophron</i>     | <i>O. americanum</i>               | 1      | -        | 1         |
| Omophroninae   | Omophronini   | <i>Omophron</i>     | <i>O. ovale</i>                    | 4      | -        | 4         |
| Trechinae      | Patrobini     | <i>Patrobus</i>     | <i>P. longicornis</i>              | 3      | 1        | 4         |
| Trechinae      | Patrobini     | <i>Diplois</i>      | <i>D. filicornis</i>               | -      | 1        | 1         |
| Trechinae      | Anillini      | <i>gen. nov.</i>    | Anillini <i>gen. nov. sp. nov.</i> | 3      | 1        | 4         |
| Trechinae      | Bembidiini    | <i>Bembidion</i>    | <i>B. sp. nr. transversale</i>     | 4      | -        | 4         |
| Trechinae      | Bembidiini    | <i>Bembidion</i>    | <i>B. incrematum</i>               | 2      | 1        | 3         |
| Trechinae      | Bembidiini    | <i>Bembidion</i>    | <i>B. iridescens</i>               | 1      | 1        | 2         |
| Trechinae      | Bembidiini    | <i>Bembidion</i>    | <i>B. kuprianovi #2</i>            | 1      | -        | 1         |
| Trechinae      | Bembidiini    | <i>Bembidion</i>    | <i>B. obliquulum</i>               | 1      | 1        | 2         |
| Trechinae      | Bembidiini    | <i>Bembidion</i>    | <i>B. sejunctum</i>                | 1      | -        | 1         |
| Trechinae      | Bembidiini    | <i>Bembidion</i>    | <i>B. zephyrum</i>                 | 3      | -        | 3         |
| Trechinae      | Bembidiini    | <i>Lionepha</i>     | <i>L. sp. nov.</i>                 | 3      | -        | 3         |
| Trechinae      | Pogonini      | <i>Diplochaetus</i> | <i>D. planatus</i>                 | 5      | -        | 5         |
| Trechinae      | Tachyini      | <i>Mioptachys</i>   | <i>M. flavicauda</i>               | 3      | 1        | 4         |
| Trechinae      | Tachyini      | <i>Tachyta</i>      | <i>T. inornata</i>                 | 1      | 1        | 2         |

|                                                      |                 |                        |                           |   |   |   |
|------------------------------------------------------|-----------------|------------------------|---------------------------|---|---|---|
| Trechinae                                            | Tachyini        | <i>Tachyura</i>        | <i>T. rapax</i>           | - | 1 | 1 |
| Trechinae                                            | Tachyini        | <i>Paratachys</i>      | <i>P. sp. 1</i>           | 1 | - | 1 |
| Trechinae                                            | Tachyini        | <i>Paratachys</i>      | <i>P. sp. 2</i>           | 2 | - | 2 |
| Trechinae                                            | Trechini        | <i>Pachydesus</i>      | <i>P. sp.</i>             | 3 | 1 | 4 |
| Trechinae                                            | Trechini        | <i>Perileptus</i>      | <i>P. sp.</i>             | 1 | 1 | 2 |
| Trechinae                                            | Trechini        | <i>Trechodes</i>       | <i>T. sp.</i>             | - | 1 | 1 |
| Trechinae                                            | Trechini        | <i>Trechosiella</i>    | <i>T. scotti</i>          | 3 | - | 3 |
| Trechinae                                            | Trechini        | <i>Trechus</i>         | <i>T. humboldti</i>       | 3 | 1 | 4 |
| Broscinae                                            | Broscini        | <i>Zacotus</i>         | <i>Z. matthewsii</i>      | 1 | 3 | 4 |
| Broscinae                                            | Broscini        | <i>Broscodera</i>      | <i>B. insignis</i>        | 1 | 1 | 2 |
| Non-Harpalinae<br>Carabidae<br><i>incertae sedis</i> | Psydrini        | <i>Psydrus</i>         | <i>P. piceus</i>          | - | 1 | 1 |
| Non-Harpalinae<br>Carabidae<br><i>incertae sedis</i> | Gehringiini     | <i>Gehringia</i>       | <i>G. olympica</i>        | 2 | - | 2 |
| Non-Harpalinae<br>Carabidae<br><i>incertae sedis</i> | Apotomini       | <i>Apotomus</i>        | <i>A. sp.</i>             | 1 | 3 | 4 |
| Non-Harpalinae<br>Carabidae<br><i>incertae sedis</i> | Promecognathini | <i>Promecognathus</i>  | <i>P. laevissimus</i>     | 1 | 1 | 2 |
| Non-Harpalinae<br>Carabidae<br><i>incertae sedis</i> | Hiletini        | <i>Eucamaragnathus</i> | <i>E. oxygonus</i>        | 1 | 2 | 3 |
| Scaritinae s. l.                                     | Clivinini       | <i>Ardistomis</i>      | <i>A. obliquata</i>       | 3 | - | 3 |
| Scaritinae s. l.                                     | Clivinini       | <i>Ardistomis</i>      | <i>A. schaumii</i>        | 5 | - | 5 |
| Scaritinae s. l.                                     | Clivinini       | <i>Aspidoglossa</i>    | <i>A. subangulata</i>     | 2 | - | 2 |
| Scaritinae s. l.                                     | Clivinini       | <i>Clivina</i>         | <i>C. fossor</i>          | 3 | - | 3 |
| Scaritinae s. l.                                     | Clivinini       | <i>Paraclivina</i>     | <i>P. bipustulata</i>     | 2 | - | 2 |
| Scaritinae s. l.                                     | Clivinini       | <i>Schizogenius</i>    | <i>S. litigiosus</i>      | 2 | 1 | 3 |
| Scaritinae s. l.                                     | Clivinini       | <i>Semiardistomis</i>  | <i>S. viridis</i>         | 6 | - | 6 |
| Scaritinae s. l.                                     | Dyschiriini     | <i>Akephorus</i>       | <i>A. obesus</i>          | 2 | 3 | 5 |
| Scaritinae s. l.                                     | Dyschiriini     | <i>Dyschirius</i>      | <i>D. dejeanii</i>        | 1 | - | 1 |
| Scaritinae s. l.                                     | Dyschiriini     | <i>Dyschirius</i>      | <i>D. globosus</i>        | 5 | - | 5 |
| Scaritinae s. l.                                     | Dyschiriini     | <i>Dyschirius</i>      | <i>D. haemorrhoidalis</i> | 1 | - | 1 |
| Scaritinae s. l.                                     | Dyschiriini     | <i>Dyschirius</i>      | <i>D. pacificus</i>       | 1 | 1 | 2 |
| Scaritinae s. l.                                     | Dyschiriini     | <i>Dyschirius</i>      | <i>D. thoracicus</i>      | 4 | - | 4 |
| Scaritinae s. l.                                     | Dyschiriini     | <i>Dyschirius</i>      | <i>D. tridentatus</i>     | 1 | - | 1 |
| Scaritinae s. l.                                     | Dyschiriini     | <i>Striganoviella</i>  | <i>S. vanhillei</i>       | 5 | 1 | 6 |
| Scaritinae s. l.                                     | Pasimachini     | <i>Pasimachus</i>      | <i>P. californicus</i>    | 2 | 1 | 3 |

|                  |               |                       |                                                      |   |   |   |
|------------------|---------------|-----------------------|------------------------------------------------------|---|---|---|
| Scaritinae s. l. | Scaritini     | <i>Haplotrachelus</i> | <i>H. atropsis</i>                                   | 1 | - | 1 |
| Scaritinae s. l. | Scaritini     | <i>Haplotrachelus</i> | <i>H. cf. latesulcatus</i>                           | 2 | - | 2 |
| Scaritinae s. l. | Scaritini     | <i>Haplotrachelus</i> | <i>H. sp.</i>                                        | 2 | - | 2 |
| Scaritinae s. l. | Scaritini     | <i>Scarites</i>       | <i>S. marinus</i>                                    | 2 | 1 | 3 |
| Scaritinae s. l. | Scaritini     | <i>Scarites</i>       | <i>S. (Distichus) sp.</i>                            | 1 | - | 1 |
| Scaritinae s. l. | Scaritini     | <i>Scarites</i>       | <i>S.</i><br><i>(Parallelomorphus)</i><br><i>sp.</i> | 2 | - | 2 |
| Rhysodinae       | Clinidiini    | <i>Clinidium</i>      | <i>C. sp. nr.</i><br><i>guatemalenum</i>             | 1 | 1 | 2 |
| Rhysodinae       | Omoglymmiini  | <i>Omoglymmius</i>    | <i>O. hamatus</i>                                    | 3 | - | 3 |
| Cicindelinae     | Amblycheilini | <i>Omus</i>           | <i>Omus audouini</i>                                 | 5 | 2 | 7 |
| Cicindelinae     | Amblycheilini | <i>Omus</i>           | <i>Omus dejeanii</i>                                 | 2 | 1 | 3 |
| Cicindelinae     | Cicindelini   | <i>Brasiella</i>      | <i>B. wickhami</i>                                   | 1 | - | 1 |
| Cicindelinae     | Cicindelini   | <i>Cicindela</i>      | <i>C. haemorrhagica</i>                              | 2 | 1 | 3 |
| Cicindelinae     | Megacephalini | <i>Tetracha</i>       | <i>T. carolina</i>                                   | 2 | 1 | 3 |
| Paussinae        | Metriini      | <i>Metrius</i>        | <i>M. contractus</i>                                 | 2 | 1 | 3 |
| Paussinae        | Ozaenini      | <i>Goniotropis</i>    | <i>G. parca</i>                                      | 3 | - | 3 |
| Paussinae        | Ozaenini      | <i>Ozaena</i>         | <i>O. sp.</i>                                        | - | 1 | 1 |
| Paussinae        | Ozaenini      | <i>Pachyteles</i>     | <i>P. sp.</i>                                        | - | 1 | 1 |
| Paussinae        | Paussini      | <i>Cerapterus</i>     | <i>C. sp.</i>                                        | 1 | - | 1 |
| Paussinae        | Paussini      | <i>Paussus</i>        | <i>P. cucullatus</i>                                 | - | 2 | 2 |
| Paussinae        | Paussini      | <i>Paussus</i>        | <i>P. (Bathypaussus)</i><br><i>sp.</i>               | 1 | - | 1 |
| Brachininae      | Brachinini    | <i>Brachinus</i>      | <i>B. elongatulus</i>                                | 4 | 3 | 7 |
| Brachininae      | Brachinini    | <i>Brachinus</i>      | <i>B. ichabodopsis</i>                               | 1 | - | 1 |
| Brachininae      | Brachinini    | <i>Mastax</i>         | <i>M. sp.</i>                                        | 3 | 1 | 4 |
| Brachininae      | Brachinini    | <i>Pheropsophus</i>   | <i>P. sp. 1</i>                                      | 4 | 1 | 5 |
| Brachininae      | Brachinini    | <i>Pheropsophus</i>   | <i>P. sp. 2</i>                                      | 1 | - | 1 |
| Harpalinae       | Abacetini     | <i>Abacetus</i>       | <i>A. sp.</i>                                        | 3 | 1 | 4 |
| Harpalinae       | Abacetini     | <i>Stolonis</i>       | <i>S. intercepta</i>                                 | 1 | 1 | 2 |
| Harpalinae       | Abacetini     | <i>Stolonis</i>       | <i>S. sp.</i>                                        | 1 | - | 1 |
| Harpalinae       | Anthiini      | <i>Anthia</i>         | <i>Anthia</i><br><i>(Termophilum) sp.</i>            | 1 | - | 1 |
| Harpalinae       | Anthiini      | <i>Cycloloba</i>      | <i>C. sp.</i>                                        | 1 | - | 1 |
| Harpalinae       | Catapiesini   | <i>Catapiesis</i>     | <i>C. sp.</i>                                        | - | 1 | 1 |
| Harpalinae       | Chlaeniini    | <i>Chlaenius</i>      | <i>C. cumatilis</i>                                  | 2 | - | 2 |
| Harpalinae       | Chlaeniini    | <i>Chlaenius</i>      | <i>C. glaucus</i>                                    | 1 | - | 1 |
| Harpalinae       | Chlaeniini    | <i>Chlaenius</i>      | <i>C. harpalinus</i>                                 | 1 | 1 | 2 |

|            |                |                         |                                       |   |   |   |
|------------|----------------|-------------------------|---------------------------------------|---|---|---|
| Harpalinae | Chlaeniini     | <i>Chlaenius</i>        | <i>C. leucoscelis</i>                 | 2 | - | 2 |
| Harpalinae | Chlaeniini     | <i>Chlaenius</i>        | <i>C. prasinus</i>                    | 1 | - | 1 |
| Harpalinae | Chlaeniini     | <i>Chlaenius</i>        | <i>C. ruficauda</i>                   | 2 | - | 2 |
| Harpalinae | Chlaeniini     | <i>Chlaenius</i>        | <i>C. sericeus</i>                    | 1 | - | 1 |
| Harpalinae | Chlaeniini     | <i>Chlaenius</i>        | <i>C. tricolor</i>                    | 1 | - | 1 |
| Harpalinae | Ctenodactylini | <i>Leptotrachelus</i>   | <i>L. sp.</i>                         | 1 | - | 1 |
| Harpalinae | Cyclosomini    | <i>Tetragonoderus</i>   | <i>T. fasciatus</i>                   | 3 | 2 | 5 |
| Harpalinae | Cyclosomini    | <i>Tetragonoderus</i>   | <i>T. sp. nr. latipennis</i>          | 1 | - | 1 |
| Harpalinae | Dryptini       | <i>Drypta</i>           | <i>D. sp.</i>                         | 2 | 1 | 3 |
| Harpalinae | Galeritini     | <i>Galerita</i>         | <i>G. atripes</i>                     | - | 1 | 1 |
| Harpalinae | Galeritini     | <i>Galerita</i>         | <i>G. bicolor</i>                     | - | 1 | 1 |
| Harpalinae | Galeritini     | <i>Galerita</i>         | <i>G. forreri</i>                     | 1 | - | 1 |
| Harpalinae | Galeritini     | <i>Galerita</i>         | <i>G. lecontei</i>                    | 2 | - | 2 |
| Harpalinae | Graphipterini  | <i>Graphipterus</i>     | <i>G. sp.</i>                         | 1 | - | 1 |
| Harpalinae | Harpalini      | <i>Anisodactylus</i>    | <i>A. alternans</i>                   | 1 | 2 | 3 |
| Harpalinae | Harpalini      | <i>Anisodactylus</i>    | <i>A. anthracinus</i>                 | 2 | - | 2 |
| Harpalinae | Harpalini      | <i>Anisodactylus</i>    | <i>A. similis</i>                     | 1 | - | 1 |
| Harpalinae | Harpalini      | <i>Bradycellus</i>      | <i>B. sp. 1</i>                       | 1 | - | 1 |
| Harpalinae | Harpalini      | <i>Bradycellus</i>      | <i>B. sp. 2</i>                       | 1 | - | 1 |
| Harpalinae | Harpalini      | <i>Discoderus</i>       | <i>D. sp.</i>                         | 1 | - | 1 |
| Harpalinae | Harpalini      | <i>Euryderus</i>        | <i>E. grossus</i>                     | 2 | - | 2 |
| Harpalinae | Harpalini      | <i>Harpalus</i>         | <i>H. affinis</i>                     | 2 | 2 | 4 |
| Harpalinae | Harpalini      | <i>Polpochila</i>       | <i>P. erro</i>                        | 2 | - | 2 |
| Harpalinae | Harpalini      | <i>Selenophorus</i>     | <i>S. sp.</i>                         | - | 1 | 1 |
| Harpalinae | Harpalini      | <i>Stenolophus</i>      | <i>S. sp.</i>                         | 1 | - | 1 |
| Harpalinae | Harpalini      | <i>Stenomorphus</i>     | <i>S. convexior</i>                   | 3 | - | 3 |
| Harpalinae | Helluonini     | <i>Helluomorphoides</i> | <i>H. papago</i>                      | 1 | 1 | 2 |
| Harpalinae | Helluonini     | <i>Macrocheilus</i>     | <i>M. sp.</i>                         | 1 | - | 1 |
| Harpalinae | Lachnophorini  | <i>Ega</i>              | <i>E. sallei</i>                      | 1 | - | 1 |
| Harpalinae | Lachnophorini  | <i>Lachnophorus</i>     | <i>L. elegantulus</i>                 | 2 | - | 2 |
| Harpalinae | Lachnophorini  | <i>Lachnophorus</i>     | <i>L. sp. nr. elegantulus</i>         | 1 | - | 1 |
| Harpalinae | Lebiini        | <i>Agra</i>             | <i>A. sp. 1</i>                       | 1 | - | 1 |
| Harpalinae | Lebiini        | <i>Agra</i>             | <i>A. sp. 2</i>                       | - | 1 | 1 |
| Harpalinae | Lebiini        | <i>Apenes</i>           | <i>A. lucidula</i>                    | 1 | - | 1 |
| Harpalinae | Lebiini        | <i>Calleida</i>         | <i>C. bella</i>                       | 1 | - | 1 |
| Harpalinae | Lebiini        | <i>Calleida</i>         | <i>C. decora</i>                      | - | 1 | 1 |
| Harpalinae | Lebiini        | <i>Calleida</i>         | <i>C. jansoni</i>                     | 2 | - | 2 |
| Harpalinae | Lebiini        | <i>Cymindis</i>         | <i>C. punctifera</i>                  | 1 | - | 1 |
| Harpalinae | Lebiini        | <i>Cymindis</i>         | <i>C. punctigera</i>                  | 1 | - | 1 |
| Harpalinae | Lebiini        | <i>Cymindis</i>         | <i>C. basipunctata</i> -<br>group sp. | 1 | - | 1 |
| Harpalinae | Lebiini        | <i>Lebia</i>            | <i>L. deceptrix</i>                   | 1 | 1 | 2 |
| Harpalinae | Lebiini        | <i>Lebia</i>            | <i>L. subgrandis</i>                  | 1 | - | 1 |

|            |                |                       |                                         |   |   |   |
|------------|----------------|-----------------------|-----------------------------------------|---|---|---|
| Harpalinae | Lebiini        | <i>Lebia</i>          | <i>L. viridis</i>                       | 1 | 1 | 2 |
| Harpalinae | Lebiini        | <i>Phloeoxena</i>     | <i>P. nigricollis</i>                   | 1 | - | 1 |
| Harpalinae | Lebiini        | <i>Stenognathus</i>   | <i>S. quadricollis</i>                  | - | 1 | 1 |
| Harpalinae | Lebiini        | <i>Syntomus</i>       | <i>S. americanus</i>                    | 1 | 1 | 2 |
| Harpalinae | Lebiini        | <i>Thyreopterus</i>   | <i>T. flavosignatus</i>                 | 1 | - | 1 |
| Harpalinae | Licinini       | <i>Badister</i>       | <i>B. ferrugineus</i>                   | 1 | - | 1 |
| Harpalinae | Licinini       | <i>Dicaelus</i>       | <i>D. suffusus</i>                      | 1 | 2 | 3 |
| Harpalinae | Licinini       | <i>Diplocheila</i>    | <i>D. nupera</i>                        | 1 | - | 1 |
| Harpalinae | Morionini      | <i>Morion</i>         | <i>M. sp.</i>                           | 1 | - | 1 |
| Harpalinae | Odacanthini    | <i>Colliuris</i>      | <i>C. pennsylvanica</i>                 | 3 | 1 | 4 |
| Harpalinae | Oodini         | <i>Anatrichis</i>     | <i>A. minuta</i>                        | 1 | - | 1 |
| Harpalinae | Oodini         | <i>Oodes</i>          | <i>O. fluvialis</i>                     | 8 | - | 8 |
| Harpalinae | Oodini         | <i>Stenocrepis</i>    | <i>S. elegans</i>                       | 1 | - | 1 |
| Harpalinae | Panagaeini     | <i>Panagaeus</i>      | <i>P. sallei</i>                        | 3 | - | 3 |
| Harpalinae | Peleciini      | <i>Disphaericus</i>   | <i>D. sp.</i>                           | 1 | 1 | 2 |
| Harpalinae | Pentagonicini  | <i>Pentagonica</i>    | <i>P. sp.</i>                           | 2 | - | 2 |
| Harpalinae | Perigonini     | <i>Perigona</i>       | <i>P. nigriceps</i>                     | 1 | - | 1 |
| Harpalinae | Platynini      | <i>Agonum</i>         | <i>A. piceolum</i>                      | 4 | 1 | 5 |
| Harpalinae | Platynini      | <i>Agonum</i>         | <i>A. muelleri</i>                      | 2 | - | 2 |
| Harpalinae | Platynini      | <i>Rhadine</i>        | <i>R. dissecta</i> -group<br><i>sp.</i> | 1 | - | 1 |
| Harpalinae | Platynini      | <i>Sericoda</i>       | <i>S. bembidioides</i>                  | 1 | - | 1 |
| Harpalinae | Pseudomorphini | <i>Pseudomorpha</i>   | <i>P. sp.</i>                           | - | 1 | 1 |
| Harpalinae | Pterostichini  | <i>Abaris</i>         | <i>A. splendida</i>                     | 2 | 1 | 3 |
| Harpalinae | Pterostichini  | <i>Cyrtomoscelis</i>  | <i>C. cf. dwesana</i>                   | 3 | - | 3 |
| Harpalinae | Pterostichini  | <i>Cyclotrachelus</i> | <i>C. dejeanellus</i>                   | 2 | 1 | 3 |
| Harpalinae | Pterostichini  | <i>Hybothecus</i>     | <i>H. flohri</i>                        | - | 1 | 1 |
| Harpalinae | Pterostichini  | <i>Poecilus</i>       | <i>P. laetulus</i>                      | 1 | 1 | 2 |
| Harpalinae | Pterostichini  | <i>Poecilus</i>       | <i>P. scitulus</i>                      | - | 1 | 1 |
| Harpalinae | Pterostichini  | <i>Pterostichus</i>   | <i>P. infernalis</i>                    | 2 | 3 | 5 |
| Harpalinae | Pterostichini  | <i>Pterostichus</i>   | <i>P. lama</i>                          | 1 | - | 1 |
| Harpalinae | Pterostichini  | <i>Pterostichus</i>   | <i>P. melanarius</i>                    | - | 1 | 1 |
| Harpalinae | Sphodrini      | <i>Calathus</i>       | <i>C. peropacus</i>                     | 2 | 1 | 3 |
| Harpalinae | Sphodrini      | <i>Synuchus</i>       | <i>S. dubius</i>                        | 3 | 2 | 5 |
| Harpalinae | Zabrini        | <i>Amara</i>          | <i>A. aenea</i>                         | 6 | 2 | 8 |
| Harpalinae | Zabrini        | <i>Amara</i>          | <i>A. farcta</i>                        | - | 1 | 1 |
| Harpalinae | Zuphiini       | <i>Pseudaptinus</i>   | <i>P. horni</i>                         | - | 1 | 1 |
| Harpalinae | Zuphiini       | <i>Pseudaptinus</i>   | <i>P. simplex</i>                       | - | 1 | 1 |
| Harpalinae | Zuphiini       | <i>Pseudaptinus</i>   | <i>P. tenuicollis</i>                   | 1 | - | 1 |

**Table 2.** Summarized sperm morphological data for 177 species of ground beetles. In order to limit column width, the term rod is used in place of spermatostyle. All measurements are reported in microns ( $\mu\text{m}$ ) excluding the last column, which lists the average number of sperm found in a conjugate.

| Taxon                              | Conjugate type | Specimens examined (n) | Sperm length (avg) | Head length (avg) | Head width (avg) | Rod length (avg) | Rod width (avg) | Rod bare apex length (avg) | Sperm in conjugate (avg) |
|------------------------------------|----------------|------------------------|--------------------|-------------------|------------------|------------------|-----------------|----------------------------|--------------------------|
| <i>Abacetus</i> sp.                | Sheet          | 4                      | 590                | 1.5               | 0.3              | 2300             | 45              | 490                        | 200                      |
| <i>Abaris splendidula</i>          | Sheet          | 3                      | 170                | 1.5               | 0.4              | 190              | 7.9             | 12                         | 24                       |
| <i>Agonum muelleri</i>             | Simple rod     | 2                      | 240                | 1.2               | 0.6              | 220              | 10              | 6.2                        | 51                       |
| <i>Agonum piceolum</i>             | Simple rod     | 5                      | 260                |                   |                  | 160              | 8.1             | 16                         | 66                       |
| <i>Agra</i> sp. 1                  |                | 1                      | 74                 |                   |                  |                  |                 |                            |                          |
| <i>Agra</i> sp. 2                  | Simple rod     | 1                      | 140                |                   |                  | 90               | 5.2             | 19                         |                          |
| <i>Akephorus obesus</i>            | Simple rod     | 5                      | 860                | 2.9               | 6.3              | 53               | 6.9             | 1.0                        | 7.2                      |
| <i>Amara aenea</i>                 | Simple rod     | 8                      | 940                | 1.4               | 0.4              | 1600             | 7.8             | 3.3                        | 190                      |
| <i>Amara farcta</i>                |                | 1                      | 540                | 2.4               | 0.5              |                  |                 |                            |                          |
| <i>Anatrichis minuta</i>           |                | 1                      | 720                | 4.3               | 0.5              |                  |                 |                            |                          |
| <i>Anillini gen. nov. sp. nov.</i> | Singleton      | 4                      | 290                |                   |                  |                  |                 |                            |                          |
| <i>Anisodactylus alternans</i>     | Simple rod     | 3                      | 410                | 2.2               | 0.4              | 3700             | 21              | 60                         | 120                      |
| <i>Anisodactylus anthracinus</i>   | Simple rod     | 2                      | 730                | 2.3               | 0.4              | 3900             | 17              | 94                         | 880                      |
| <i>Anisodactylus similis</i>       | Simple rod     | 1                      | 380                |                   |                  | 3300             | 19              |                            | 120                      |
| <i>Anthia (Termophilum)</i> sp.    |                | 1                      | 1200               |                   |                  | 5800             | 13              |                            |                          |
| <i>Apenes lucidula</i>             | Simple rod     | 1                      | 200                | 2.3               | 0.5              | 470              | 4.6             | 12                         | 31                       |
| <i>Apotomus</i> sp.                | Singleton      | 4                      | 2700               |                   |                  |                  |                 |                            |                          |
| <i>Ardistomis obliquata</i>        | Simple rod     | 3                      | 990                |                   |                  | 1400             | 21              |                            | 220                      |
| <i>Ardistomis schaumii</i>         | Simple rod     | 5                      | 660                |                   |                  | 840              | 11              | 72                         | 77                       |
| <i>Aspidoglossa subangulata</i>    | Simple rod     | 2                      | 790                |                   |                  | 6600             | 29              | 190                        | 160                      |
| <i>Badister ferrugineus</i>        | Simple rod     | 1                      | 660                | 3.5               | 0.3              | 3800             | 19              |                            |                          |

| Taxon                                       | Conjugate type          | Specimens examined (n) | Sperm length (avg) | Head length (avg) | Head width (avg) | Rod length (avg) | Rod width (avg) | Rod bare apex length (avg) | Sperm in conjugate (avg) |
|---------------------------------------------|-------------------------|------------------------|--------------------|-------------------|------------------|------------------|-----------------|----------------------------|--------------------------|
| <i>Bembidion incrematum</i>                 | Singleton               | 3                      | 300                |                   |                  |                  |                 |                            |                          |
| <i>Bembidion iridescens</i>                 | Aggregate               | 2                      | 290                |                   |                  |                  |                 |                            |                          |
| <i>Bembidion kuprianovi</i> #2              | Singleton               | 1                      | 520                |                   |                  |                  |                 |                            |                          |
| <i>Bembidion obliquulum</i>                 | Singleton               | 2                      | 860                |                   |                  |                  |                 |                            |                          |
| <i>Bembidion sejunctum</i>                  | Aggregate               | 1                      | 760                |                   |                  |                  |                 |                            | 6.8                      |
| <i>Bembidion</i> sp.nr. <i>transversale</i> | Singleton/<br>Aggregate | 4                      | 710                |                   |                  |                  |                 |                            | 6.9                      |
| <i>Bembidion zephyrum</i>                   | Singleton               | 3                      | 420                |                   |                  |                  |                 |                            |                          |
| <i>Blethisa oregonensis</i>                 | Simple rod              | 2                      | 51                 | 11                | 0.8              | 260              | 11              | 9                          | 220                      |
| <i>Brachinus elongatulus</i>                | Simple rod              | 5                      | 130                | 0.8               | 0.3              | 17 /<br>350      | 5.2 /<br>5.1    | 9.8 / ?                    | 51 / ?                   |
| <i>Brachinus ichabodopsis</i>               | Simple rod              | 1                      | 120                |                   |                  | 640              |                 |                            |                          |
| <i>Bradycellus</i> sp. 1                    | Simple rod              | 1                      | 170                | 0.9               | 0.4              | 4900             | 11              |                            | 900                      |
| <i>Bradycellus</i> sp. 2                    | Simple rod              | 1                      | 130                | 1.2               | 0.4              | 2200             | 8.9             | 72                         | 2100                     |
| <i>Brsiella wickhami</i>                    | Singleton               | 1                      | 110                |                   |                  |                  |                 |                            |                          |
| <i>Broscoдера insignis</i>                  | Singleton<br>with rod   | 2                      | 1500               | 73                | 0.6              | 92               | 1.8             | 11                         |                          |
| <i>Calathus peropacus</i>                   | Simple rod              | 3                      | 210                | 2.4               | 0.5              | 3800             | 24              | 130                        | 2900                     |
| <i>Calleida bella</i>                       | Simple rod              | 1                      | 190                |                   |                  | 77               | 4.1             | 1.9                        |                          |
| <i>Calleida decora</i>                      | Sheet                   | 1                      | 160                | 2.1               | 0.4              |                  |                 |                            |                          |
| <i>Calleida jansoni</i>                     | Sheet                   | 2                      | 220                |                   |                  | 230              | 8.8             |                            |                          |
| <i>Calosoma peregrinator</i>                | Simple rod              | 2                      | 78                 | 18                | 0.8              | 44               | 11              | 2.9                        | 48                       |
| <i>Carabus nemoralis</i>                    | Simple rod              | 1                      | 72                 | 11                | 0.6              | 46               | 17              | 26                         | 47                       |
| <i>Carabus taedatus</i>                     | Simple rod              | 1                      | 81                 | 11                | 0.7              | 51               | 14              | 4.7                        | 120                      |

| Taxon                                        | Conjugate type | Specimens examined (n) | Sperm length (avg) | Head length (avg) | Head width (avg) | Rod length (avg) | Rod width (avg) | Rod bare apex length (avg) | Sperm in conjugate (avg) |
|----------------------------------------------|----------------|------------------------|--------------------|-------------------|------------------|------------------|-----------------|----------------------------|--------------------------|
| <i>Catapiesis</i> sp.                        |                | 1                      | 280                | 1.0               | 0.3              |                  |                 |                            |                          |
| <i>Cerapterus</i> sp.                        | Singleton      | 1                      | 390                | 26                | 0.8              |                  |                 |                            |                          |
| <i>Chlaenius cumatilis</i>                   | Simple rod     | 2                      | 480                | 1.7               | 0.4              | 660              | 6.3             | 15                         | 77                       |
| <i>Chlaenius glaucus</i>                     | Simple rod     | 1                      | 1200               | 2.9               | 0.4              | 910              | 8.5             | 82                         |                          |
| <i>Chlaenius harpalinus</i>                  |                | 2                      | 510                | 3.7               | 0.5              | 490              | 5.3             |                            |                          |
| <i>Chlaenius leucoscelis</i>                 | Simple rod     | 2                      | 340                | 3.0               | 0.5              | 49               | 13              | 4.3                        | 81                       |
| <i>Chlaenius prasinus</i>                    | Simple rod     | 1                      | 360                | 3.0               | 0.4              | 17               | 8.6             | 3.2                        | 56                       |
| <i>Chlaenius ruficauda</i>                   | Sheet          | 2                      | 1000               | 6.7               | 0.4              | 5000             | 8.1             | 79                         |                          |
| <i>Chlaenius sericeus</i>                    | Simple rod     | 1                      | 330                | 1.4               | 0.5              | 450              | 5.1             | 22                         | 130                      |
| <i>Chlaenius tricolor</i>                    | Simple rod     | 1                      | 250                | 3.5               | 0.7              | 250              | 3.9             | 13                         |                          |
| <i>Cicindela haemorrhagica</i>               | Singleton      | 3                      | 97                 |                   |                  |                  |                 |                            |                          |
| <i>Clinidium</i> sp. nr. <i>guatemalenum</i> | Simple rod     | 2                      | 270                | 16                | 0.5              |                  |                 |                            |                          |
| <i>Clivina fossor</i>                        | Sheet          | 3                      | 91                 |                   |                  | 3100             | 37              | 2600                       | 370                      |
| <i>Colliuris pensylvanica</i>                | Simple rod     | 3                      | 330                | 2.1               | 0.4              | 840              | 18              | 8.1                        | 340                      |
| <i>Cychrus tuberculatus</i>                  | Simple rod     | 1                      | 50                 | 9.1               | 0.7              |                  |                 |                            |                          |
| <i>Cycloloba</i> sp.                         |                | 1                      | 260                |                   |                  | 4400             | 15              |                            |                          |
| <i>Cyclotrachelus dejeanellus</i>            | Sheet          | 3                      | 480                | 4.3               | 0.4              | 6200             | 10              | 130                        |                          |
| <i>Cymindis basipunctata</i> -group sp.      | Sheet          | 1                      | 240                |                   |                  | 800              | 3.5             |                            |                          |
| <i>Cymindis punctifera</i>                   | Simple rod     | 1                      | 240                | 1.6               | 0.3              | 1100             | 16              | 6.1                        | 85                       |
| <i>Cymindis punctigera</i>                   | Simple rod     | 1                      | 210                | 1.6               | 0.3              | 550              | 10              | 59                         | 130                      |
| <i>Cyrtomoscelis</i> cf. <i>dwesana</i>      | Sheet          | 3                      | 700                |                   |                  |                  | 20              |                            |                          |
| <i>Dicaelus suffusus</i>                     | Simple rod     | 3                      | 490                |                   |                  |                  |                 |                            |                          |
| <i>Diplochaetus planatus</i>                 | Singleton      | 5                      | 2200               | 46                | 0.4              |                  |                 |                            |                          |



| Taxon                             | Conjugate type | Specimens examined (n) | Sperm length (avg) | Head length (avg) | Head width (avg) | Rod length (avg) | Rod width (avg) | Rod bare apex length (avg) | Sperm in conjugate (avg) |
|-----------------------------------|----------------|------------------------|--------------------|-------------------|------------------|------------------|-----------------|----------------------------|--------------------------|
| <i>Diplocheila nupera</i>         | Simple rod     | 1                      | 570                |                   |                  | 13000            | 62              |                            |                          |
| <i>Diplous filicornis</i>         | Simple rod     | 1                      | 73                 | 1.8               | 0.6              |                  |                 |                            |                          |
| <i>Discoderus sp.</i>             | Sheet          | 1                      | 300                | 1.8               | 0.4              | 860              | 6.9             | 3.8                        | 34                       |
| <i>Disphaericus sp.</i>           | Simple rod     | 2                      | 790                |                   |                  | 600              | 11              |                            | 54                       |
| <i>Drypta sp.</i>                 |                | 3                      | 180                |                   |                  |                  |                 |                            |                          |
| <i>Dyschirius dejeanii</i>        | Simple rod     | 1                      | 790                | 3.4               | 1.3              | 1000             | 4.6             | 7.9                        | 7.3                      |
| <i>Dyschirius globosus</i>        | Simple rod     | 6                      | 320                | 15                | 0.5              |                  | 3.5             | 21                         | 20                       |
| <i>Dyschirius haemorrhoidalis</i> | Simple rod     | 1                      | 550                | 2.0               | 1.9              | 280              | 4               | 13                         | 7.7                      |
| <i>Dyschirius pacificus</i>       | Simple rod     | 2                      | 990                | 3.5               | 1.1              |                  |                 |                            | 7.2                      |
| <i>Dyschirius thoracicus</i>      | Simple rod     | 4                      | 360                | 4                 | 4.3              | 40               | 7               | 3                          | 7.5                      |
| <i>Dyschirius tridentatus</i>     | Simple rod     | 1                      | 820                | 4.0               | 4.5              | 1000             | 8.1             | 34                         | 35                       |
| <i>Ega sallei</i>                 |                | 1                      | 1100               |                   |                  |                  |                 |                            |                          |
| <i>Elaphrus purpurans</i>         | Simple rod     | 5                      | 73                 | 13                | 0.9              | 83               | 4.9             | 3.5                        | 54                       |
| <i>Eucamaragnathus oxygenus</i>   | Singleton      | 3                      | 62                 | 8.5               | 1.7              |                  |                 |                            |                          |
| <i>Euryderus grossus</i>          | Simple rod     | 2                      | 630                | 2.1               | 0.4              | 2900             | 13              | 84                         | 1100                     |
| <i>Galerita atripes</i>           |                | 1                      | 260                |                   |                  |                  |                 |                            |                          |
| <i>Galerita bicolor</i>           |                | 1                      | 300                |                   |                  |                  |                 |                            |                          |
| <i>Galerita forreri</i>           | Sheet          | 1                      | 340                |                   |                  | 4800             | 41              | 76                         |                          |
| <i>Galerita lecontei</i>          | Sheet          | 2                      | 280                |                   |                  | 3500             | 26              | 56                         |                          |
| <i>Gehringia olympica</i>         | Singleton      | 2                      | 500                |                   |                  |                  |                 |                            |                          |
| <i>Goniotropis parca</i>          | Simple rod     | 3                      | 48                 | 12                | 0.6              | 100              | 9.2             | 5.3                        | 94                       |
| <i>Graphipterus sp.</i>           | Simple rod     | 1                      | 960                | 0.5               | 0.4              | 2200             | 20              |                            |                          |
| <i>Haplotrachelus atropsis</i>    | Simple rod     | 1                      | 470                | 0.6               | 0.2              | 120              | 13              |                            | 96                       |

| Taxon                                  | Conjugate type | Specimens examined (n) | Sperm length (avg) | Head length (avg) | Head width (avg) | Rod length (avg) | Rod width (avg) | Rod bare apex length (avg) | Sperm in conjugate (avg) |
|----------------------------------------|----------------|------------------------|--------------------|-------------------|------------------|------------------|-----------------|----------------------------|--------------------------|
| <i>Haplotrachelus cf. latesulcatus</i> | Simple rod     | 2                      | 420                | 0.8               | 0.3              | 180              | 18              | 23                         | 130                      |
| <i>Haplotrachelus sp.</i>              | Simple rod     | 2                      | 410                | 0.9               | 0.3              | 140              | 16              | 11                         | 75                       |
| <i>Harpalus affinis</i>                | Simple rod     | 4                      | 730                |                   |                  | 1800             | 12              | 510                        |                          |
| <i>Helluomorphoides papago</i>         |                | 2                      | 450                |                   |                  |                  |                 |                            |                          |
| <i>Hybothecus flohri</i>               |                | 1                      | 360                | 2.0               | 0.4              |                  |                 |                            |                          |
| <i>Lachnophorus elegantulus</i>        | Simple rod     | 2                      | 290                |                   |                  | 710              | 22              | 25                         | 130                      |
| <i>Lachnophorus sp.</i>                | Sheet          | 1                      | 290                |                   |                  | 610              | 13              |                            |                          |
| <i>Lebia deceptrix</i>                 | Sheet          | 2                      | 340                | 1.2               | 0.3              | 430              | 5.2             | 4.5                        |                          |
| <i>Lebia subgrandis</i>                | Sheet          | 1                      | 370                | 2.0               | 0.3              | 520              | 6.5             | 3.2                        |                          |
| <i>Lebia viridis</i>                   | Simple rod     | 2                      | 340                | 0.8               | 0.4              | 800              | 14              | 31                         |                          |
| <i>Leptotrachelus sp.</i>              | Sheet          | 1                      | 240                | 2.1               | 0.4              | 1100             | 63              | 120                        |                          |
| <i>Lionepha sp. nov.</i>               | Aggregate      | 3                      | 400                |                   |                  |                  |                 |                            | 6.7                      |
| <i>Loricera decempunctata</i>          | Simple rod     | 3                      | 130                | 12                | 0.9              | 1400             | 5.5             | 8.7                        | 1500                     |
| <i>Loricera foveata</i>                | Simple rod     | 2                      | 120                | 13                | 0.9              |                  |                 |                            |                          |
| <i>Macrocheilus sp.</i>                |                | 1                      | 510                |                   |                  | 1400             | 8.0             |                            |                          |
| <i>Mastax sp.</i>                      | Simple rod     | 4                      | 170                | 0.8               | 0.3              | 20               | 2.7             | 3.5                        | 21                       |
| <i>Metrius contractus</i>              | Simple rod     | 3                      | 150                | 7.8               | 1.0              | 84               | 7.2             | 5.0                        | 220                      |
| <i>Mioptachys flavicauda</i>           | Singleton      | 4                      | 380                | 130               | 0.6              |                  |                 |                            |                          |
| <i>Morion sp.</i>                      |                | 1                      | 140                |                   |                  |                  |                 |                            |                          |
| <i>Nebria brevicollis</i>              | Singleton      | 1                      | 1400               | 26                | 0.6              |                  |                 |                            |                          |
| <i>Notiophilus sylvaticus</i>          | Singleton      | 3                      | 2000               | 43                | 0.5              |                  |                 |                            |                          |
| <i>Omoglymmius hamatus</i>             | Simple rod     | 3                      | 290                | 44                | 0.6              | 69               | 9.1             | 6.2                        | 66                       |
| <i>Omophron americanum</i>             | Simple rod     | 1                      | 750                | 4.1               | 2.3              | 870              | 6.2             | 700                        | 130                      |

| Taxon                             | Conjugate type | Specimens examined (n) | Sperm length (avg) | Head length (avg) | Head width (avg) | Rod length (avg) | Rod width (avg) | Rod bare apex length (avg) | Sperm in conjugate (avg) |
|-----------------------------------|----------------|------------------------|--------------------|-------------------|------------------|------------------|-----------------|----------------------------|--------------------------|
| <i>Omophron ovale</i>             | Simple rod     | 4                      | 280                | 6.5               | 2.9              | 140              | 6.4             | 74                         | 40                       |
| <i>Omus audouini</i>              | Singleton      | 7                      | 120                |                   |                  |                  |                 |                            |                          |
| <i>Omus dejeanii</i>              | Singleton      | 3                      | 130                |                   |                  |                  |                 |                            |                          |
| <i>Oodes fluvialis</i>            | Simple rod     | 8                      | 880                | 1.3               | 0.4              | 520              | 8.3             |                            |                          |
| <i>Opisthius richardsoni</i>      | Singleton      | 2                      | 500                | 13                | 0.9              |                  |                 |                            |                          |
| <i>Ozaena</i> sp.                 |                | 1                      | 86                 |                   |                  |                  |                 |                            |                          |
| <i>Pachydesus</i> sp.             | Singleton      | 4                      | 250                | 1.3               | 0.4              |                  |                 |                            |                          |
| <i>Pachyteles</i> sp.             |                | 1                      | 130                |                   |                  |                  |                 |                            |                          |
| <i>Panagaeus sallei</i>           | Simple rod     | 3                      | 1400               | 6.7               | 0.5              | 1100             | 20              | 430                        | 610                      |
| <i>Paraclivina bipustulata</i>    | Sheet          | 2                      | 540                |                   |                  | 1900             | 64              | 1100                       | 370                      |
| <i>Paratachys</i> sp. 1           | Singleton      | 1                      | 290                |                   |                  |                  |                 |                            |                          |
| <i>Paratachys</i> sp. 2           | Singleton      | 2                      | 450                | 29                | 0.5              |                  |                 |                            |                          |
| <i>Pasimachus californicus</i>    | Simple rod     | 3                      | 390                | 0.8               | 0.3              | 86               | 16              | 24                         | 66                       |
| <i>Patrobis longicornis</i>       | Simple rod     | 4                      | 76                 | 1.3               | 0.3              | 74               | 4.8             | 0.6                        | 23                       |
| <i>Paussus (Bathypaussus)</i> sp. | Singleton      | 1                      | 420                | 22                | 0.5              |                  |                 |                            |                          |
| <i>Paussus cucullatus</i>         | Singleton      | 2                      | 370                | 31                | 0.7              |                  |                 |                            |                          |
| <i>Pentagonica</i> sp.            | Simple rod     | 2                      | 260                | 1.1               | 0.3              | 250              | 5.4             | 41                         | 26                       |
| <i>Perigona nigriceps</i>         | Simple rod     | 1                      | 150                |                   |                  | 88               | 3.7             | 14                         | 33                       |
| <i>Perileptus</i> sp.             | Singleton      | 2                      | 200                | 0.9               | 0.4              |                  |                 |                            |                          |
| <i>Pheropsophus</i> sp. 1         | Simple rod     | 5                      | 130                | 1.0               | 0.3              | 41000            | 7.8             | 8.5                        |                          |
| <i>Pheropsophus</i> sp. 2         | Simple rod     | 1                      | 120                |                   |                  |                  | 5.2             |                            |                          |
| <i>Phloeoxena nigricollis</i>     | Simple rod     | 1                      | 710                |                   |                  | 21               | 3.1             | 12                         |                          |
| <i>Poecilus laetulus</i>          | Simple rod     | 2                      | 420                | 3.9               | 0.5              | 6100             | 140             |                            |                          |

| Taxon                                  | Conjugate type | Specimens examined (n) | Sperm length (avg) | Head length (avg) | Head width (avg) | Rod length (avg) | Rod width (avg) | Rod bare apex length (avg) | Sperm in conjugate (avg) |
|----------------------------------------|----------------|------------------------|--------------------|-------------------|------------------|------------------|-----------------|----------------------------|--------------------------|
| <i>Poecilus scitulus</i>               | Simple rod     | 1                      | 420                | 2.2               | 0.4              |                  |                 |                            |                          |
| <i>Polpochila erro</i>                 | Simple rod     | 2                      | 320                |                   |                  | 810              | 34              | 100                        |                          |
| <i>Promecognathus laevissimus</i>      | Simple rod     | 2                      | 290                | 21                | 0.7              | 2000             | 35              | 58                         | 420                      |
| <i>Pseudaptinus horni</i>              |                | 1                      | 390                |                   |                  |                  |                 |                            |                          |
| <i>Pseudaptinus simplex</i>            |                | 1                      | 450                |                   |                  |                  |                 |                            |                          |
| <i>Pseudaptinus tenuicollis</i>        |                | 1                      | 400                |                   |                  | 1600             | 5.7             |                            |                          |
| <i>Pseudomorpha</i> sp.                |                | 1                      | 200                |                   |                  |                  |                 |                            |                          |
| <i>Psydrus piceus</i>                  |                | 1                      | 260                | 13                | 0.8              |                  |                 |                            |                          |
| <i>Pterostichus infernalis</i>         | Sheet          | 5                      | 330                | 2.6               | 0.4              | 2100             | 11              | 100                        | 87                       |
| <i>Pterostichus lama</i>               | Sheet          | 1                      | 340                | 2.2               | 0.4              | 9600             | 27              | 110                        |                          |
| <i>Pterostichus melanarius</i>         | Sheet          | 1                      |                    |                   |                  |                  |                 |                            |                          |
| <i>Rhadine dissecta</i> -group sp.     | Simple rod     | 1                      | 350                | 1.7               | 0.6              | 450              | 12              | 4.2                        | 280                      |
| <i>Scaphinotus marginatus</i>          | Simple rod     | 2                      | 54                 | 11                | 0.7              | 620              | 14              | 2.3                        | 1500                     |
| <i>Scarites (Distichus)</i> sp.        | Simple rod     | 1                      | 260                | 1.0               | 0.4              | 160              | 3.9             |                            | 19                       |
| <i>Scarites (Parallelomorphus)</i> sp. | Simple rod     | 2                      | 330                |                   |                  | 40               | 7.1             |                            | 64                       |
| <i>Scarites marinus</i>                | Simple rod     | 3                      | 200                |                   |                  | 18               | 3.2             | 10                         | 17                       |
| <i>Schizogenius litigiosus</i>         | Sheet          | 3                      | 1000               |                   |                  | 960              | 4.3             | 44                         | 7.2                      |
| <i>Selenophorus</i> sp.                |                | 1                      | 260                | 2.3               | 0.4              |                  |                 |                            |                          |
| <i>Semiardistomis viridis</i>          | Simple rod     | 6                      | 540                |                   |                  | 2200             | 3.1             | 150                        | 42                       |
| <i>Sericoda bembidioides</i>           | Simple rod     | 1                      | 250                |                   |                  |                  |                 |                            |                          |
| <i>Sphaeroderus schaumii</i>           | Simple rod     | 2                      | 61                 | 15                | 0.7              | 1400             | 6.4             | 2.7                        | 1100                     |
| <i>Sphaeroderus stenostomus</i>        | Simple rod     | 5                      | 57                 | 16                | 0.6              | 1700             | 8.2             | 3.4                        | 1500                     |
| <i>Stenocrepis elegans</i>             | Simple rod     | 1                      | 400                |                   |                  | 1900             | 31              |                            | 1000                     |

| Taxon                                           | Conjugate type     | Specimens examined (n) | Sperm length (avg) | Head length (avg) | Head width (avg) | Rod length (avg) | Rod width (avg) | Rod bare apex length (avg) | Sperm in conjugate (avg) |
|-------------------------------------------------|--------------------|------------------------|--------------------|-------------------|------------------|------------------|-----------------|----------------------------|--------------------------|
| <i>Stenognathus quadricollis</i>                |                    | 1                      | 550                |                   |                  |                  |                 |                            |                          |
| <i>Stenolophus</i> sp.                          | Sheet              | 1                      | 500                | 1.4               | 0.3              | 5300             | 25              | 60                         |                          |
| <i>Stenomorphus convexior</i>                   | Sheet              | 3                      | 490                | 3.8               | 0.4              | 760              | 6.5             | 4.4                        |                          |
| <i>Stolonis intercepta</i>                      | Simple rod         | 2                      | 520                | 12                | 0.5              | 2000             | 21              | 260                        | 1100                     |
| <i>Stolonis</i> sp.                             | Simple rod         | 1                      | 370                |                   |                  | 590              | 21              |                            |                          |
| <i>Striganoviella vanhillei</i>                 | Simple rod         | 6                      | 410                | 2.0               | 1.9              | 220              | 4.0             | 21                         | 8.3                      |
| <i>Syntomus americanus</i>                      | Sheet              | 2                      | 190                | 2.1               | 0.3              | 340              | 8.5             | 35                         | 55                       |
| <i>Synuchus dubius</i>                          | Simple rod         | 5                      | 340                | 4.4               | 0.4              | 520              | 5.7             | 60                         | 94                       |
| <i>Tachyta inornata</i>                         | Mechanical         | 2                      | 3400               | 270               | 0.5              |                  |                 |                            |                          |
| <i>Tachyura rapax</i>                           | Mechanical         | 1                      | 2200               | 82                | 0.8              |                  |                 |                            |                          |
| <i>Tetracha carolina</i>                        | Singleton          | 3                      | 137                |                   |                  |                  |                 |                            |                          |
| <i>Tetragonoderus fasciatus</i>                 | Sheet              | 5                      | 250                | 1.2               | 0.4              | 2200             | 47              | 450                        | 310                      |
| <i>Tetragonoderus</i> sp. nr. <i>latipennis</i> | Sheet              | 1                      |                    |                   |                  |                  |                 |                            |                          |
| <i>Thyreopterus flavosignatus</i>               | Sheet              | 1                      | 250                | 1.5               | 0.3              | 330              | 25              | 12                         | 270                      |
| <i>Trachypachus inermis</i>                     | Simple rod         | 1                      | 530                | 8.5               | 1.5              | 87               | 9.4             | 12                         | 12                       |
| <i>Trachypachus slevini</i>                     | Simple rod         | 4                      | 840                | 12                | 1.9              |                  |                 |                            |                          |
| <i>Trechodes</i> sp.                            | Singleton          | 1                      | 100                |                   |                  |                  |                 |                            |                          |
| <i>Trechosiella scotti</i>                      | Singleton          | 3                      | 96                 | 0.7               | 0.3              |                  |                 |                            |                          |
| <i>Trechus humboldti</i>                        | Singleton          | 4                      | 110                | 1.3               | 0.3              |                  |                 |                            |                          |
| <i>Zacotus matthewsii</i>                       | Singleton with rod | 4                      | 550                | 18                | 0.7              | 17               | 4.3             |                            |                          |

## Figure Captions

**Figure 1.** Many carabid beetles make sperm conjugates by pairing their sperm to a non-cellular structure or spermatostyle. (A) illustration of a *Scaphinotus marginatus* sperm conjugate (B, C). (B) DIC light microscope image of same. (C) fluorescence microscope image of DAPI-stained sperm heads. (D) TEM of a cross section through a *S. marginatus* sperm conjugate. (E) closeup of D showing details of individual sperm. ax = axoneme, mt = mitochondrial derivatives, sty = spermatostyle, sz = spermatozoa, szN = sperm nuclei. Scale bars: 1  $\mu\text{m}$  (E), 5  $\mu\text{m}$  (D).

**Figure 2.** Variation in studied sperm quantitative traits across major taxonomic groupings of ground beetles (on logarithmic scale; lengths in  $\mu\text{m}$ ). Colored boxes beside taxon names refer to qualitative conjugate types (see text and Fig. 3). (A) sperm length. (B) sperm head length. (C) sperm head width. (D) spermatostyle length. (E) spermatostyle width. (F) number of sperm included in a conjugate. Note that there are fewer rows in plots D–F because some ground beetles do not make a spermatostyle and/or they lack sperm conjugation. In order to avoid negative transformed values for small-headed sperm in plots B and C, we adjusted all values by 1.2 $\mu\text{m}$  prior to log transformation.

**Figure 3.** A genus-level phylogenetic visualization of ground beetle sperm data. Colored boxes refer to different qualitative types of sperm conjugation, which are described in the text (see methods) and illustrated below the tree. The tree is not derived from any one particular phylogenetic analysis but is meant to summarize

current understanding of ground beetle phylogeny (see methods). Sperm length and spermatostyle length are illustrated in  $\mu\text{m}$  on a logarithmic scale to the right of the tree. Grey circles in place of gray bars indicate that a spermatostyle was observed but was not measured. When reporting sperm length and spermatostyle length, we chose one species per genus. In cases where we studied more than one species per genus, we chose one species arbitrarily. The asterisk beside *Scarites* refers to the fact that one species in the genus makes two distinct sperm forms, one of which is singleton and another that is involved in conjugation (Sasakawa 2009). Branches colored black in the tree are supported by molecular phylogenetic studies. Branches colored gray refer to low-resolution placements of taxa, which have not been previously sampled or whose placement is contentious

**Figure 4.** A genus-level phylogenetic visualization of ground beetle sperm data among higher-grade Carabidae (subfamilies Brachininae and Harpalinae). See Fig. 3 caption for more details.

**Figure 5.** Sperm and sperm conjugate morphological variation in Carabinae (A–E), Elaphrinae (F), and Trachypachinae ground beetles (G–H). (A–C) rod conjugates of *Carabus nemoralis*. (D) rod conjugates of *Sphaeroderus stenostomus*, note conjugate size polymorphism. (E) histograms of sperm conjugate size variation in four Carabinae species. (F) rod conjugate of *Elaphrus purpurans*. (G) composite image of *Trachypachus inermis* sperm heads (lower inset) and sperm conjugates. (H) *Trachypachus slevini* female reproductive tract with stored sperm and several sperm

conjugates with added thin white line to help visualize sperm storage organ and its adjoining duct. (A, F, G) stacked image of DIC and Fluorescence microscopy images. (B, D, upper inset of G) DIC microscopy. (C, lower inset of G, H) Fluorescence images with only DAPI-stained structures visible. cj = conjugate, sd = spermathecal duct, sty = spermatostyle, sp = spermatheca, sz = spermatozoa, szN = sperm nuclei. Scale bars: 10  $\mu\text{m}$  (G lower inset), 20  $\mu\text{m}$  (B–C, F–H excluding lower inset of G), 100  $\mu\text{m}$  (A, D).

**Figure 6.** Sperm and sperm conjugate morphological variation in Loricerinae (A, E), Nebriinae (B–D), and Omophroninae (F–J) ground beetles. (A) large rod conjugates of *Loricera decempunctata* include approximately 1500 sperm. (B) slender and elongate sperm heads of *Notiophilus sylvaticus*. (C) sperm heads of *Opisthius richardsoni*. (D) singleton sperm of *Opisthius richardsoni*. (E) close-up of A. (F–I) complex rod conjugates of *Omophron*. (F) *Omophron ovale* rod conjugate, note the posterior placement of sperm in spermatostyle. (G) composite image of *O. ovale* sperm head and sperm conjugate, note the asymmetry of sperm heads and the stacking of heads. (H) *Omophron americanum* rod conjugate, note the prominent bare region of the spermatostyle anteriorly. (I) *O. americanum* sperm and sperm conjugate. (J) *O. americanum* spermatozoon, note the asymmetrical attachment of the flagellum. (A–C, G, I) Fluorescence images with only DAPI-stained structures visible. (D) stacked image of Darkfield and Fluorescence microscopy images. (E–F, J) stacked image of DIC and Fluorescence microscopy images. (H) DIC microscopy. sty = spermatostyle, sz = spermatozoa, szN = sperm nuclei. Scale bars: 5  $\mu\text{m}$  (G inset), 20  $\mu\text{m}$  (B–D, F–J excluding inset of G), 50  $\mu\text{m}$  (E), 100  $\mu\text{m}$  (A).



**Figure 7.** Sperm and sperm conjugate morphological variation in Trechinae ground beetles. (A) rod conjugates of *Patrobus longicornis*. (B) rod conjugate of *Diploous filicornis* recovered from the spermatheca of a female specimen. (C) *Trechus humboldti* sperm showing two regions of fluorescence corresponding to the minute nucleus and large mitochondrial derivatives. (D) aggregate conjugate with 9 sperm in an undescribed species of *Lionepha*. (E) aggregate conjugate of *Bembidion* sp. nr. *transversale*, note the lack of a spermatostyle. (F) elongate sperm heads of *Diplochaetus planatus*. (G–H) elongate sperm heads of *Tachyta inornata*, note the zig-zag shape, the extensive pre-nuclear area, and the interaction between two spermatozoa. (I) *Tachyta inornata* appear to form mechanical conjugates by forming hairpin loops with their flagella and grappling with adjacent sperm. (J) *Tachyta inornata* sperm recovered from a female spermatheca forming characteristic loops as they swim (Supporting Information MV12–MV14 of live *T. inornata* sperm). (A, D–E, H, I) DIC microscopy. (B–C, F–G) Fluorescence images with only DAPI-stained structures visible. (J) Brightfield microscopy. loop = flagellar loops, mt = mitochondrial derivatives, sd = spermathecal duct, sp = spermatheca, sty = spermatostyle, sz = spermatozoa, szh = sperm head, szN = sperm nuclei. Scale bars: 20  $\mu\text{m}$ .

**Figure 8.** Sperm and sperm conjugate morphological variation in Broscinae (A–C) and ground beetles that we considered non-Harpalinae Carabidae of uncertain position (D–H). (A–B) *Broscodera insignis* sperm are singleton but are individually joined to a spermatostyle. (C) Composite image of *Zacotus matthewsii* sperm. Singleton sperm

appear broad-headed but are filamentous and are paired with a short and broad spermatostyle (see inset). (D–E) Rod sperm conjugate of *Promecognathus laevis* with its large corkscrew-shaped spermatostyle. The apex of the spermatostyle is frequently variable, and in *P. laevis* the apex is spoon-shaped (D). (F) *Promecognathus laevis* spermatozoon. (G) *Psydrus piceus* sperm head. (H) *Eucamaragnathus oxygonus* sperm head. (A) Brightfield microscopy. (B, D) DIC microscopy. (C, F) stacked image of DIC and Fluorescence microscopy images. (inset of C, E, G, H) Fluorescence images with only DAPI-stained structures visible. apex = apex of spermatostyle, cj = conjugate, sty = spermatostyle, sz = spermatozoa, szN = sperm nuclei. Scale bars: 5  $\mu\text{m}$  (G, H), 20  $\mu\text{m}$  (A–C, E–F), 100  $\mu\text{m}$  (D).

**Figure 9.** Sperm and sperm conjugate morphological variation in Clivinini (A–D) and Dyschiriini (E–N) (Scaritinae *partim*) ground beetles. (A) sheet conjugate of *Clivina fossor*. The spermatostyle of *C. fossor* contains a central cavity where sperm are housed. (B) large sheet conjugate of *Aspidoglossa subangulata*, note the asymmetrical attachment of sperm. (C) rod conjugate of *Ardistomis obliquata*. (D) sheet conjugate of *Schizogenius litigiosus*, note the wrapping of sperm around the spermatostyle. (E) rod conjugate of *Akephorus marinus*, note the broad and triangular sperm heads. (F–G) rod conjugate of *Dyschirius tridentatus*, note the regular distribution of sperm in the spermatostyle (G). (H) rod conjugate of *Dyschirius dejeanii*. Although the spermatostyle and sperm of *D. tridentatus* and *D. dejeanii* are similar, the arrangement of their sperm is very different. (I–N) *Dyschirius* sperm heads: (I) *D. dejeanii*, (J) *D. pacificus*, (K) *D. globosus*, (L) *D. haemorrhoidalis*, (M) *D. thoracicus*, (N) *D. tridentatus*.

(A, E, F, H) stacked image of DIC and Fluorescence microscopy images. (B–D) DIC microscopy. (G, I–N) Fluorescence images with only DAPI-stained structures visible. sty = spermatostyle, sz = spermatozoa, szN = sperm nuclei. Scale bars: 5  $\mu\text{m}$  (I–N), 20  $\mu\text{m}$  (B–H), 100  $\mu\text{m}$  (A).

**Figure 10.** Sperm and sperm conjugate morphological variation in ground beetles of the subfamilies Scaritinae (excluding Clivinini and Dyschiriini) (A–D), Rhysodinae (E), Cicindelinae (F–G), and Paussinae (H–K). (A–C) rod conjugates of *Pasimachus californicus* with small weakly fluorescent sperm heads (B–C) and large intensely fluorescent mitochondrial derivatives (B). (D) rod conjugate of *Scarites marinus*, note the conspicuous mitochondrial derivatives. (E) rod conjugates of *Omoglymmius hamatus* include sperm with only one obvious region of fluorescence following DAPI staining. (F–G) singleton sperm of *Brasiella wickhami*, note the small gap in fluorescence between the suspected nucleus and mitochondrial derivatives (G). (H) Composite image of *Metrius contractus* rod conjugate and slightly broad sperm head (inset). (I) conjugate size polymorphism in *Metrius contractus*. (J) closeup of rod conjugate of *Goniotropis parca*, note the linear arrangement of slender-headed sperm. (K) singleton sperm of an unidentified species of *Cerapterus*. (A) DIC microscopy. (D–E, H) stacked image of DIC and Fluorescence microscopy images. (F, K) stacked image of Darkfield and Fluorescence microscopy images. (B–C, G, inset of H, I–J) Fluorescence images with only DAPI-stained structures visible. cj = conjugate, mt = mitochondrial derivatives, sty = spermatostyle, sz = spermatozoa, szN = sperm nuclei. Scale bars: 5  $\mu\text{m}$  (inset of H, J), 20  $\mu\text{m}$  (A–G, I, K).

**Figure 11.** Sperm and sperm conjugate morphological variation in Brachininae (A–D) and Harpalinae (E–K) ground beetles. (A) *Brachinus elongatulus* males have monomorphic sperm but package them into two distinct rod conjugates. (B) closeup of small rod conjugate of *Brachinus elongatulus* showing the small weakly fluorescent sperm nuclei and the large intensely fluorescent mitochondrial derivatives. (C–D) giant sperm conjugates of *Pheropsophus*, which reach up to 5.8 cm. (E) rod conjugate of *Agonum piceolum*, (F) sheet conjugate in an unidentified species of *Leptotrachelus*. (G) slinky-like sheet conjugate of *Chlaenius ruficauda*. (H) rod conjugate in an unidentified species of *Bradycellus*. (I) rod conjugate of *Stenocrepis elegans*, note the thin, ribbon-like spermatostyle. (J) feather-like sheet conjugate of *Calleida jansonii*. (K) sheet conjugate of *Tetragonoderus fasciatus*, note the wavy spermatostyle and the bilateral attachment of sperm. (A, D, E, G, I–J) DIC microscopy. (B, F, H, K) Fluorescence images with only DAPI-stained structures visible. (C) Brightfield microscopy. cj = conjugate, mt = mitochondrial derivatives, sty = spermatostyle, sz = spermatozoa, szN = sperm nuclei. Scale bars: 5  $\mu\text{m}$  (inset of H), 20  $\mu\text{m}$  (A–B, D–G, I–K), 100  $\mu\text{m}$  (C, H).

**Figure 12.** Sperm + female reproductive tract interactions observed in ground beetles. (A–C) *Galerita* sperm + female interactions. (A) *Galerita bicolor* female reproductive tracts include two sperm storage organs that store different parts of a male's conjugate, redrawn from Liebherr and Will (1998). (B) A large mass of bare spermatostyles recovered from the large balloon-like spermatheca of *Galerita atripes*. (C) A large bolus of sperm recovered from the smaller spherical sperm storage organ

(= secondary spermathecal gland of Liebherr and Will (1998)) of *Galerita bicolor*. (D) closeup of the spermatostyle of *Galerita forreri*, note the presence of a groove where we suspect sperm are attached. (E–J) sperm conjugates before and after storage in female reproductive tracts, note the dissociation of sperm from spermatostyles and morphological changes to spermatostyles. (E, G, I) sperm from male preparations. (F, H, J) sperm from female spermathecae. (E–F) *Harpalus affinis*. (G–H) *Elaphrus purpurans*. (I–J) *Sphaeroderus stenostomus*. bc = bursa copulatrix, cj = conjugate, co = common oviduct, grv = groove, sg = spermathecal gland, sp1 = spermatheca 1, sp2 = spermatheca2, sty = spermatostyle, sz = spermatozoa, szN = sperm nuclei. Scale bars: 20  $\mu\text{m}$  (D, G–J), 100  $\mu\text{m}$  (B–C, E–F).

**Fig. 1**

sperm conjugate

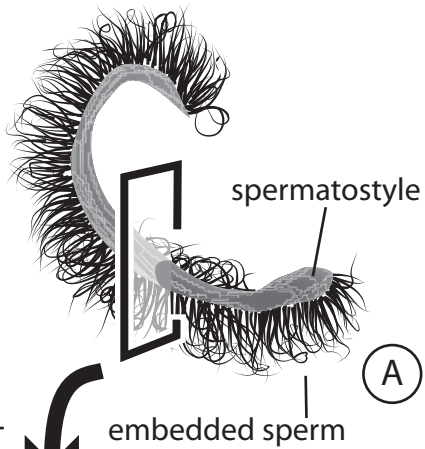

(A)

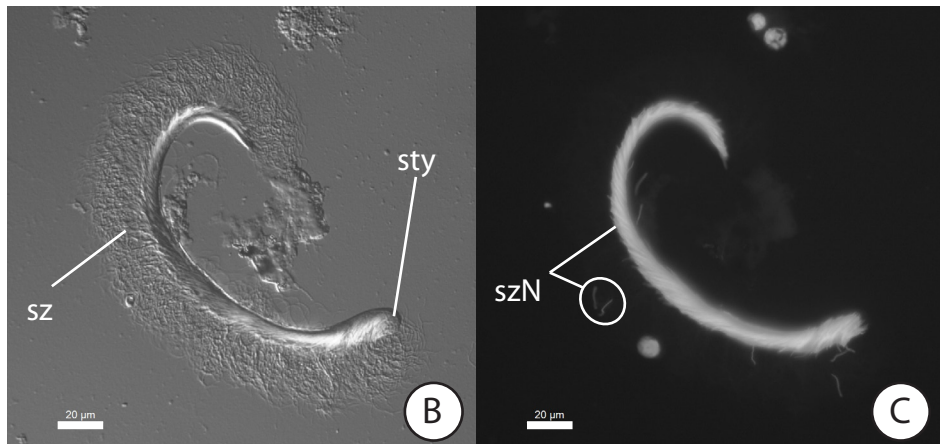

(B)

(C)

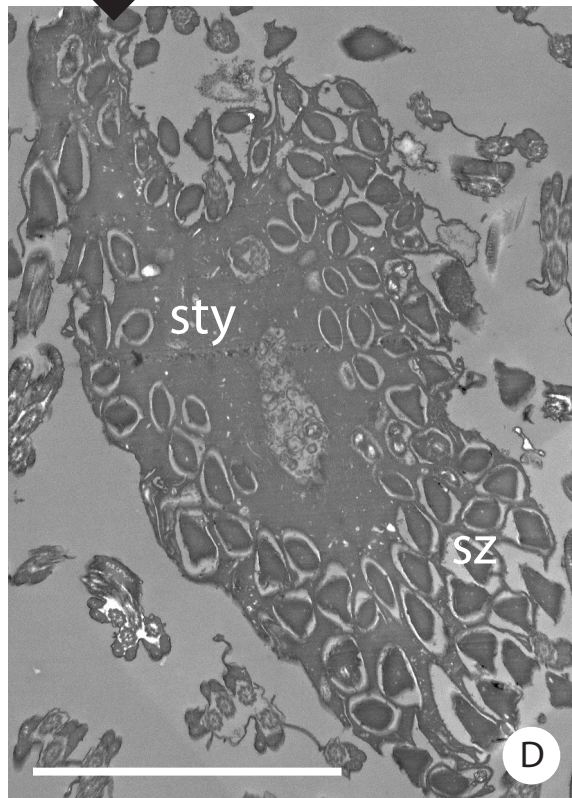

(D)

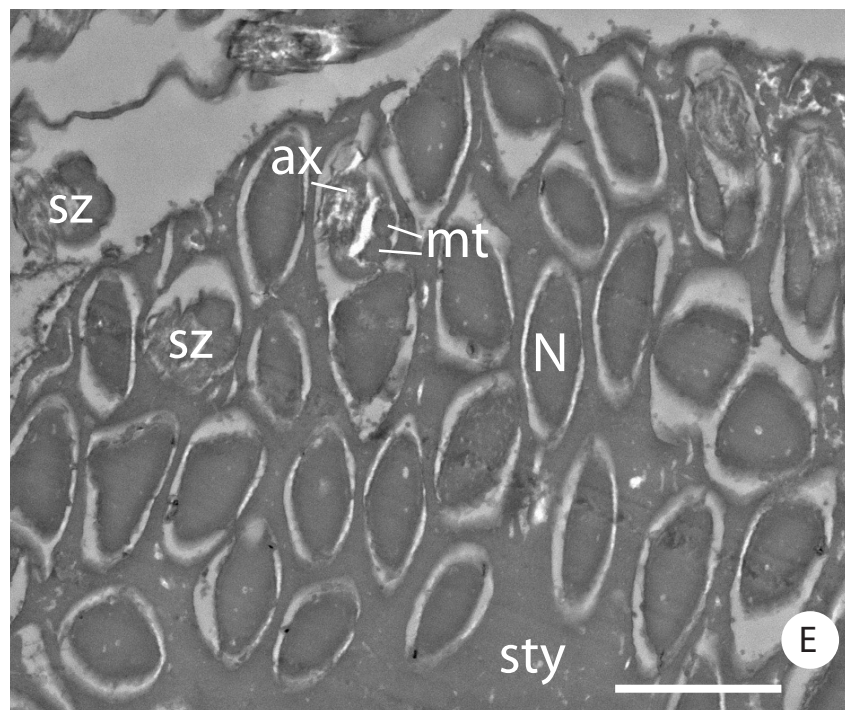

(E)

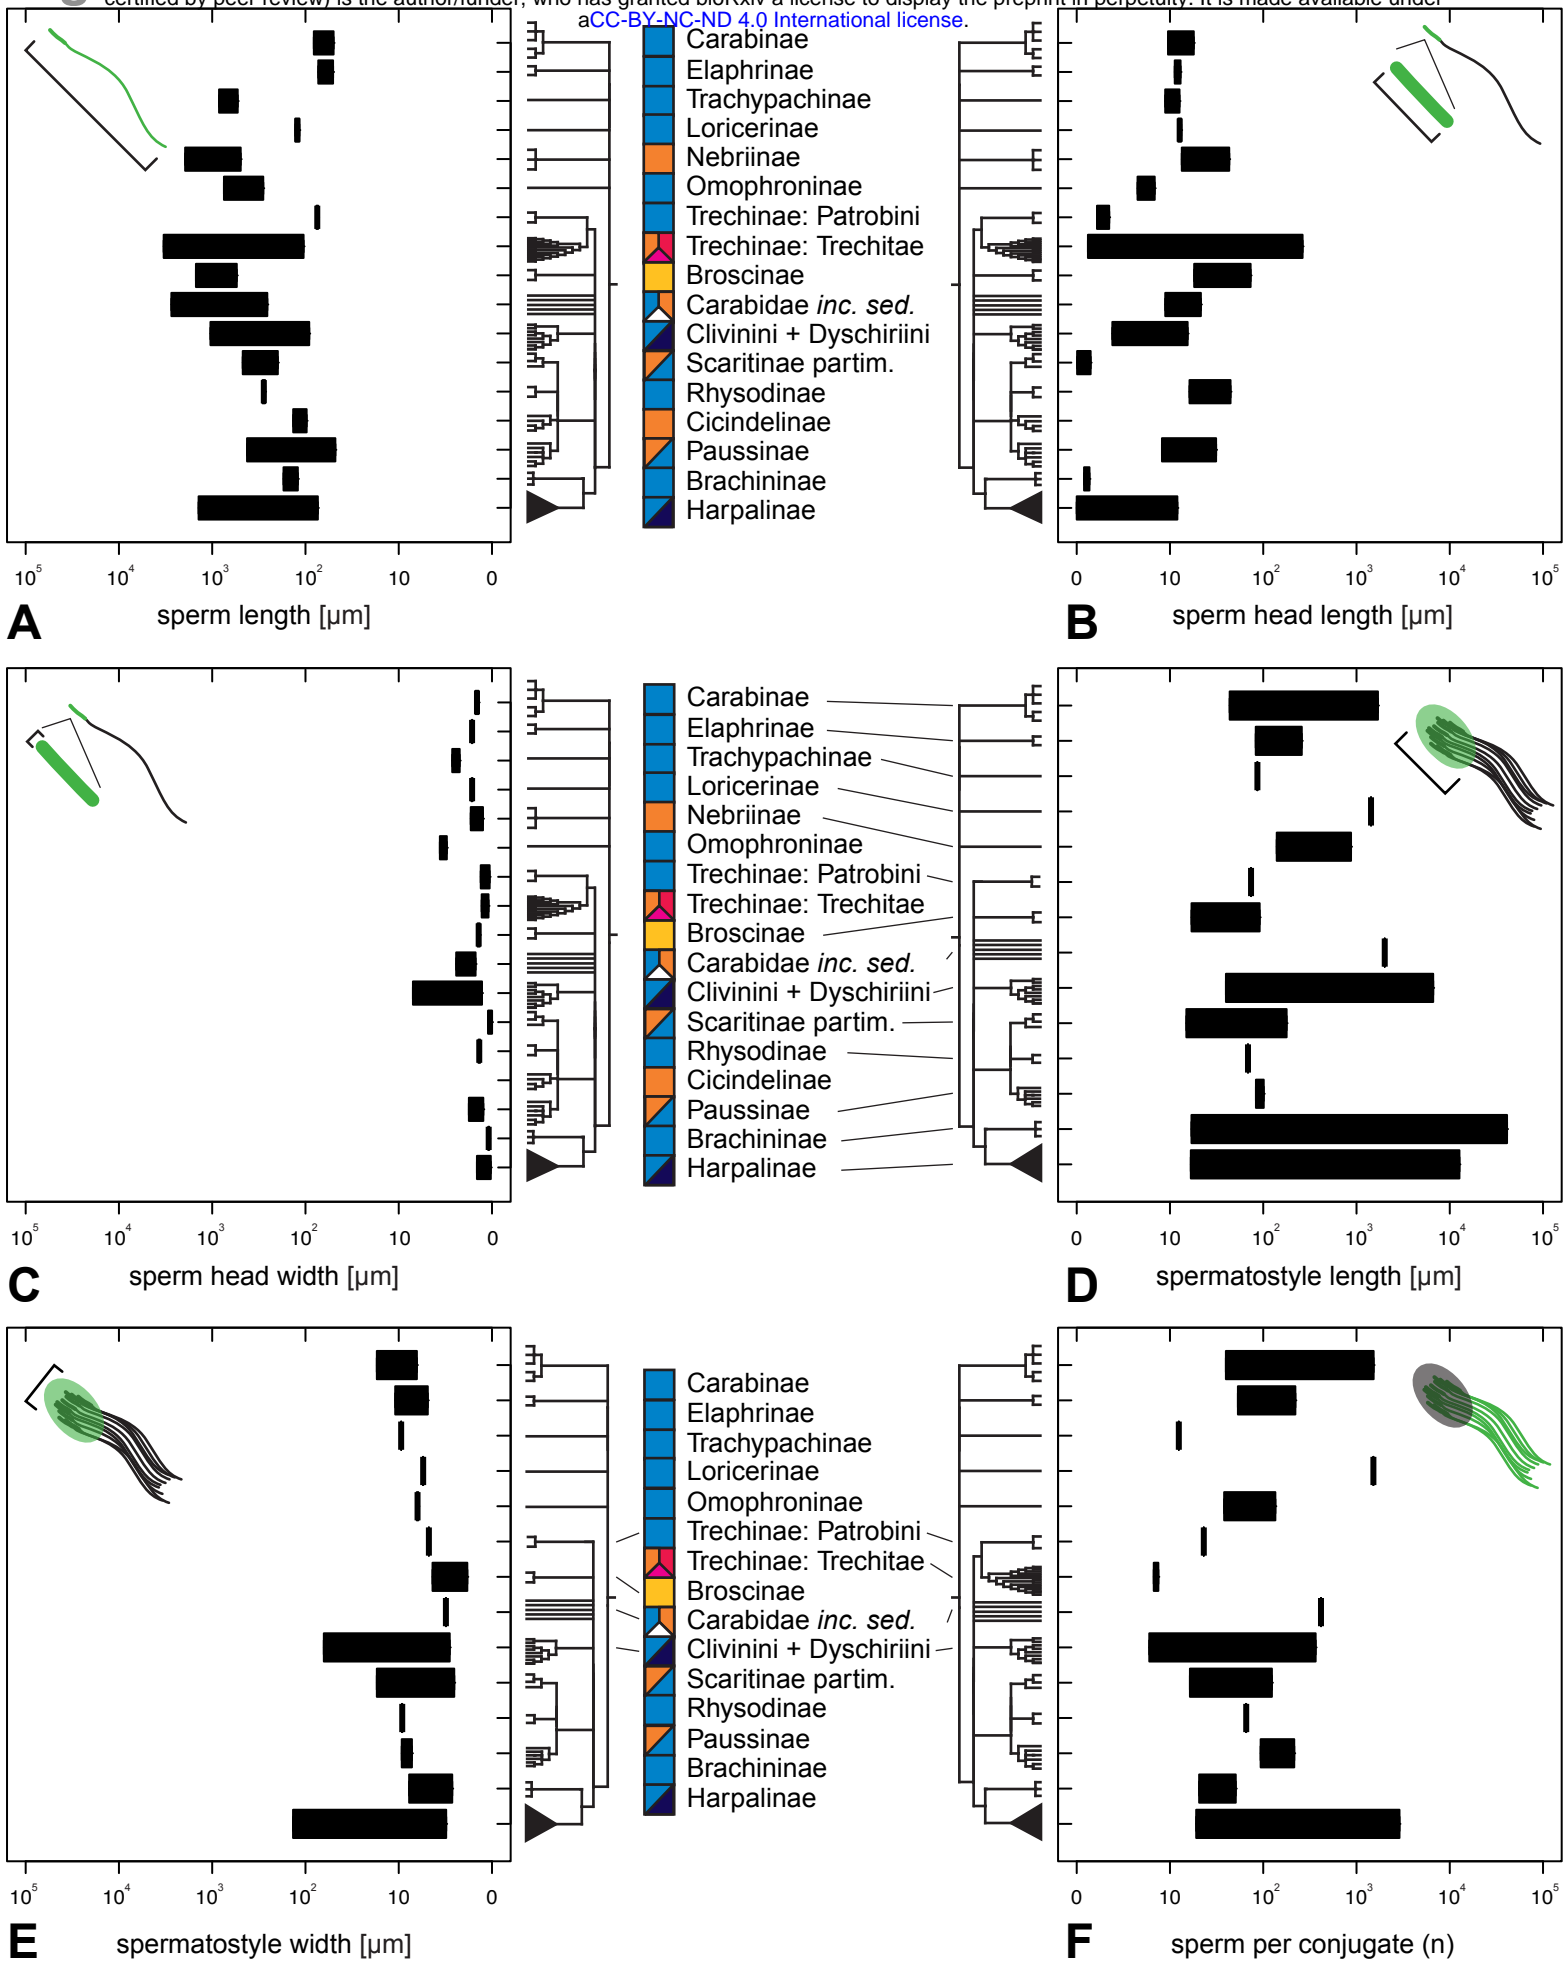

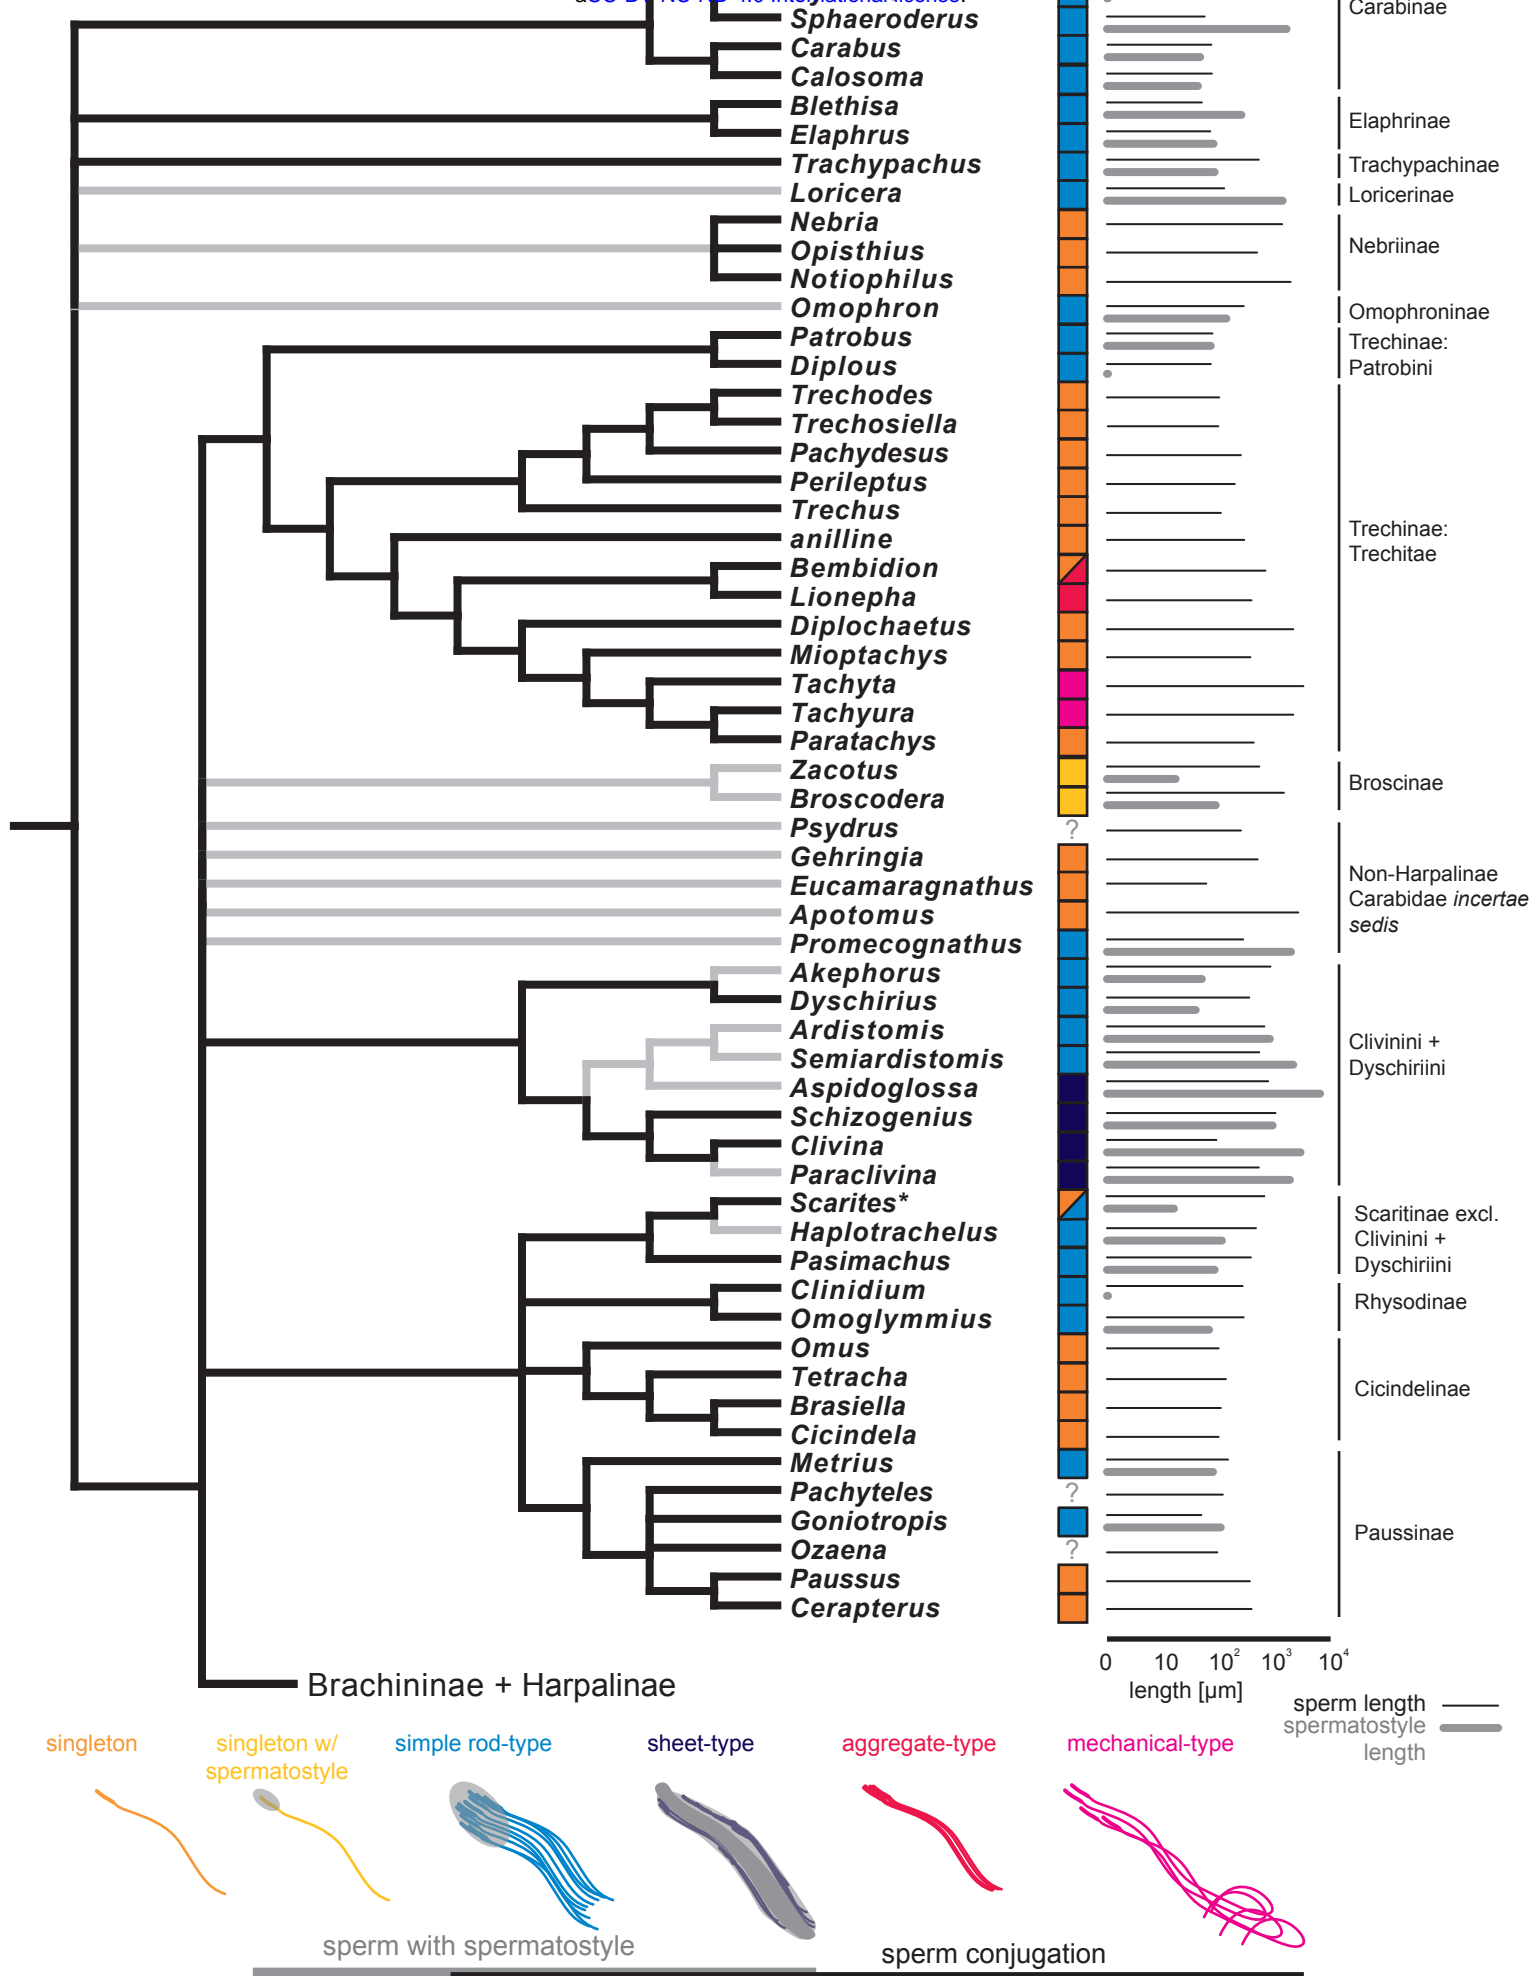



**Fig. 4**

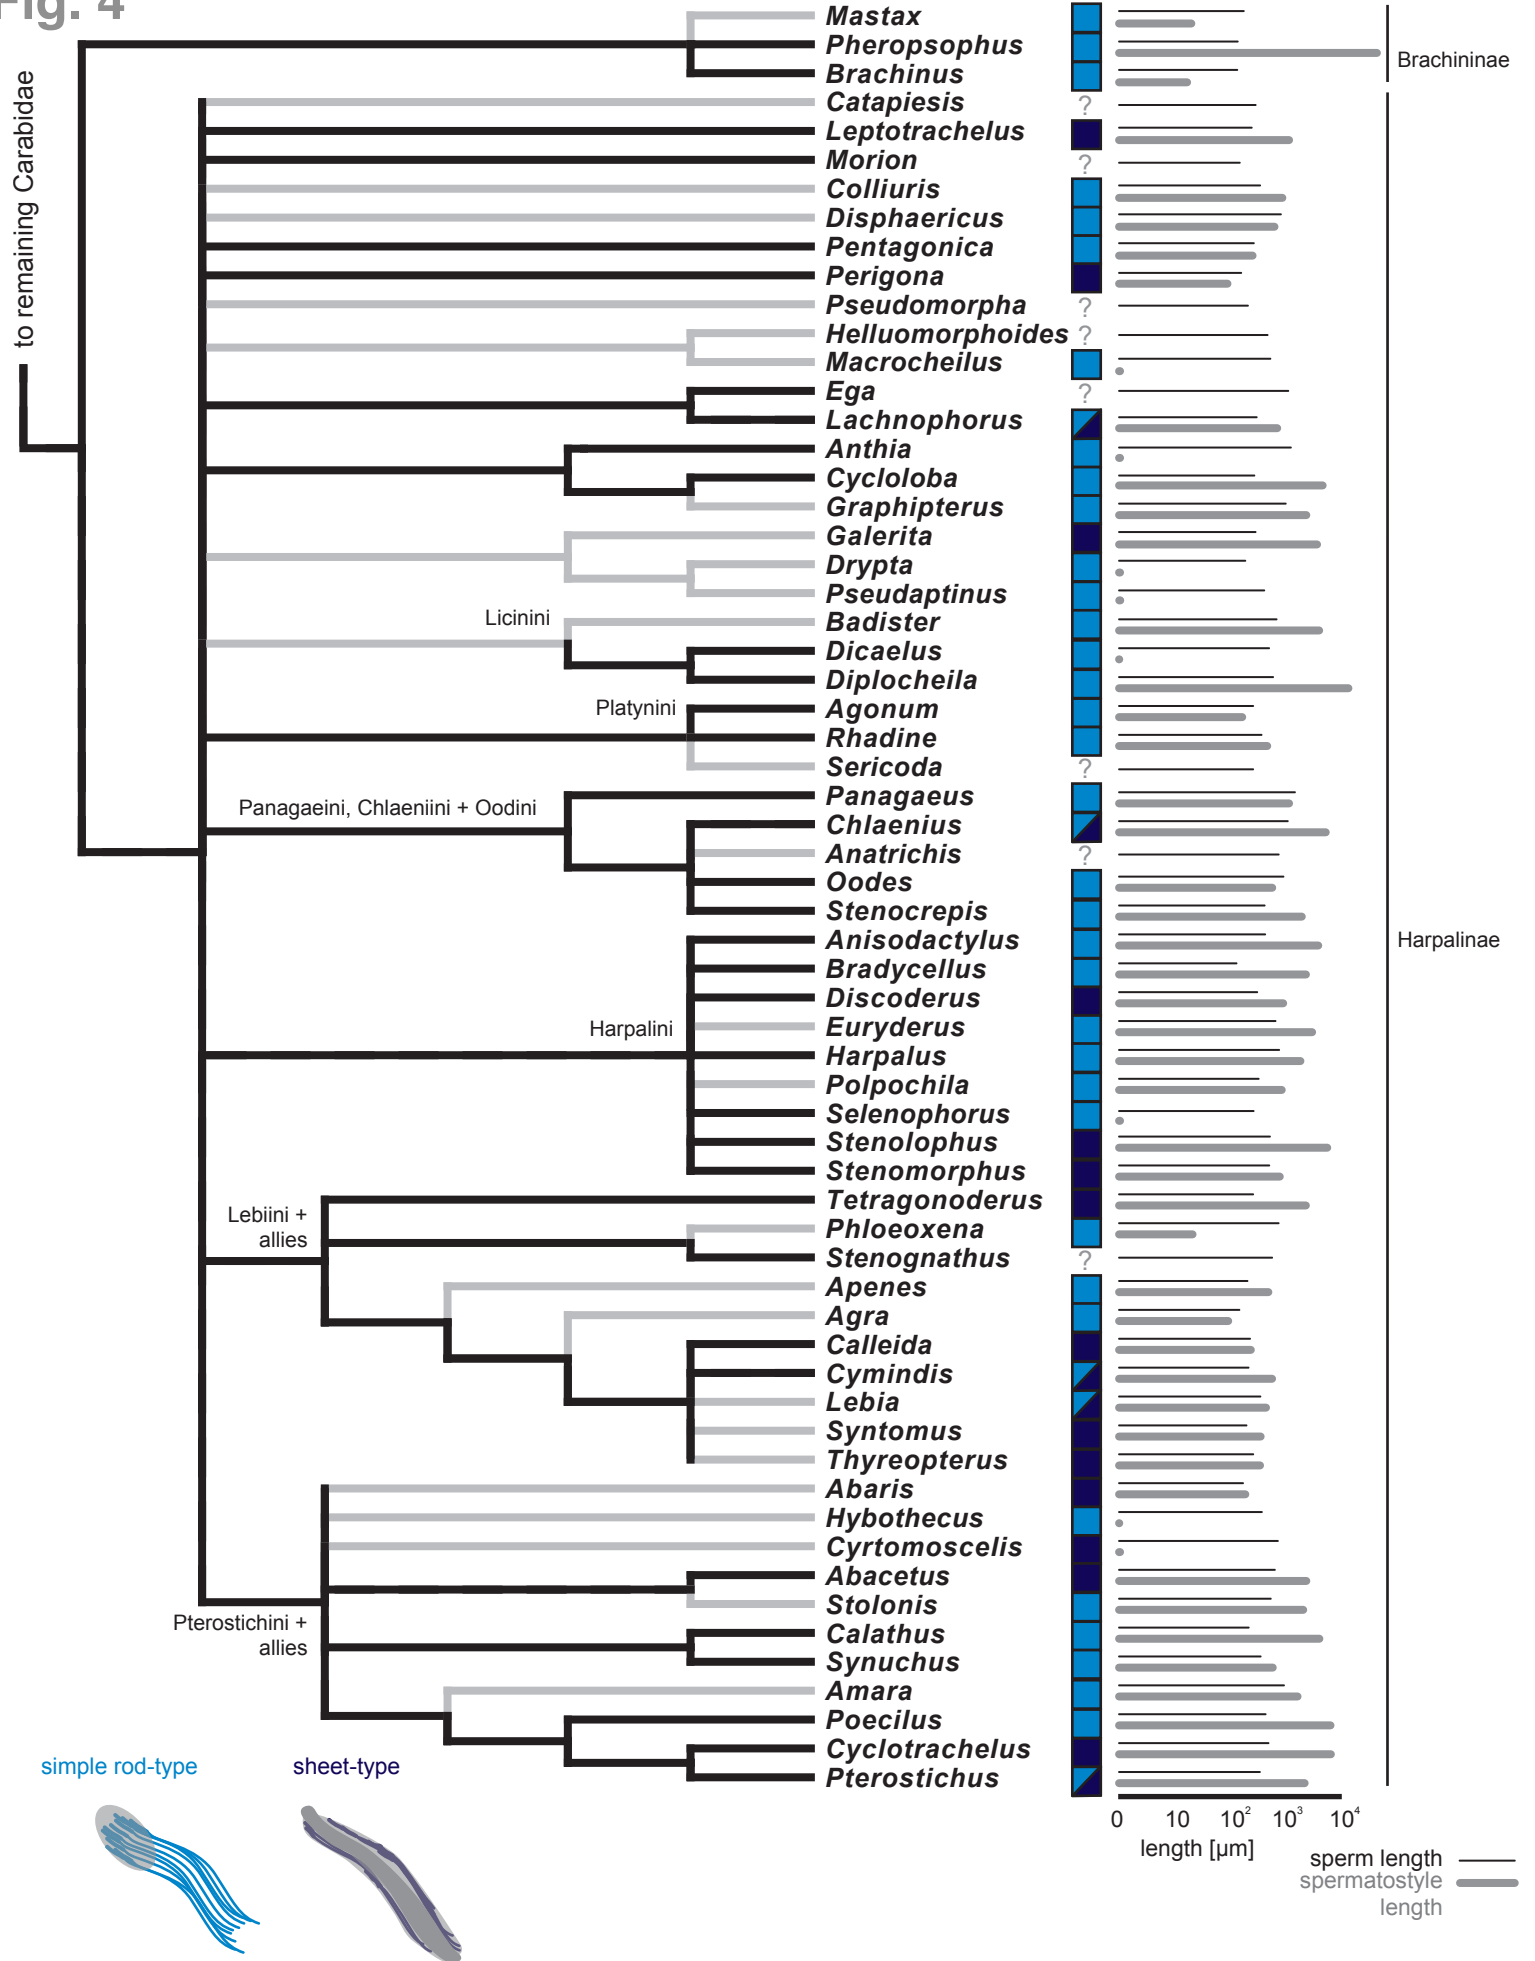

**Fig. 5**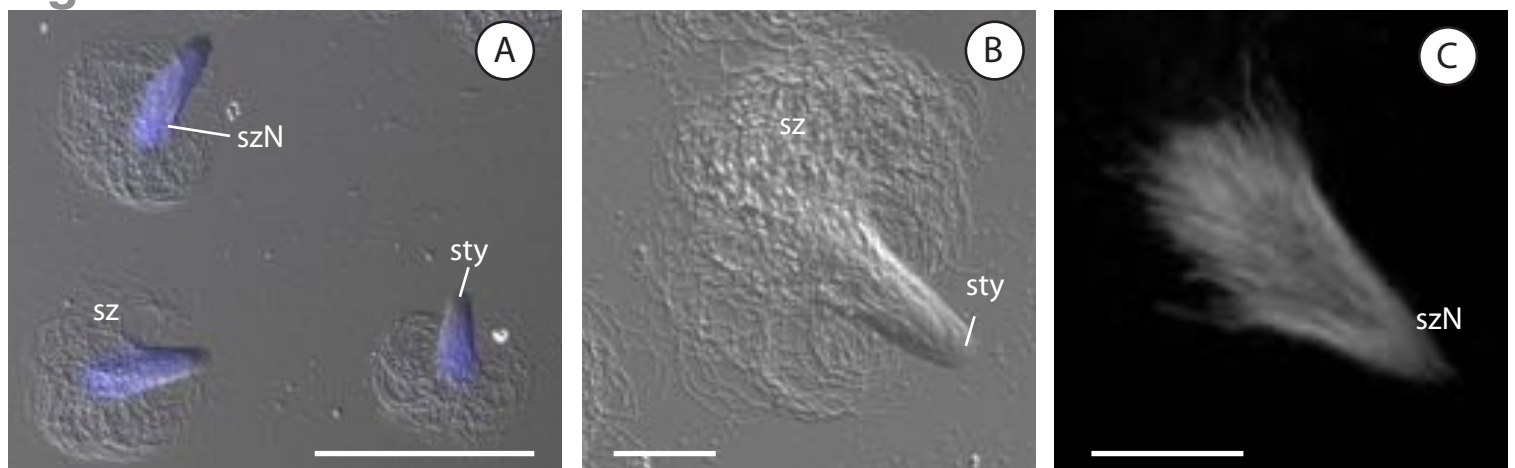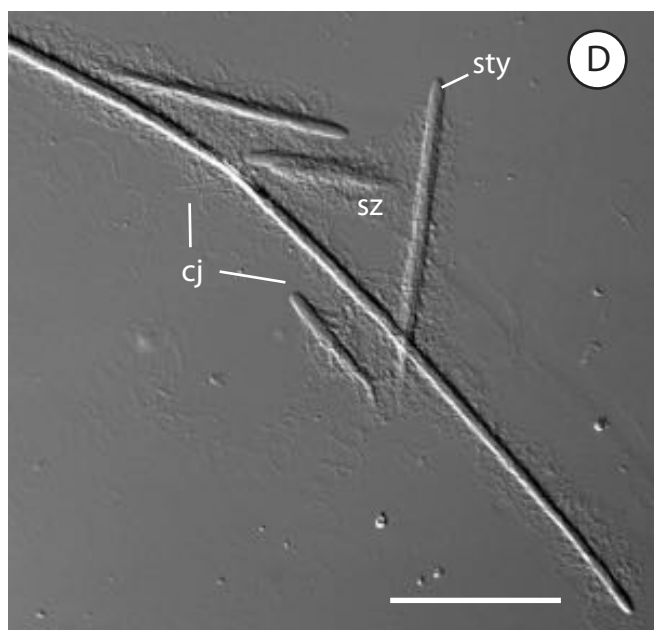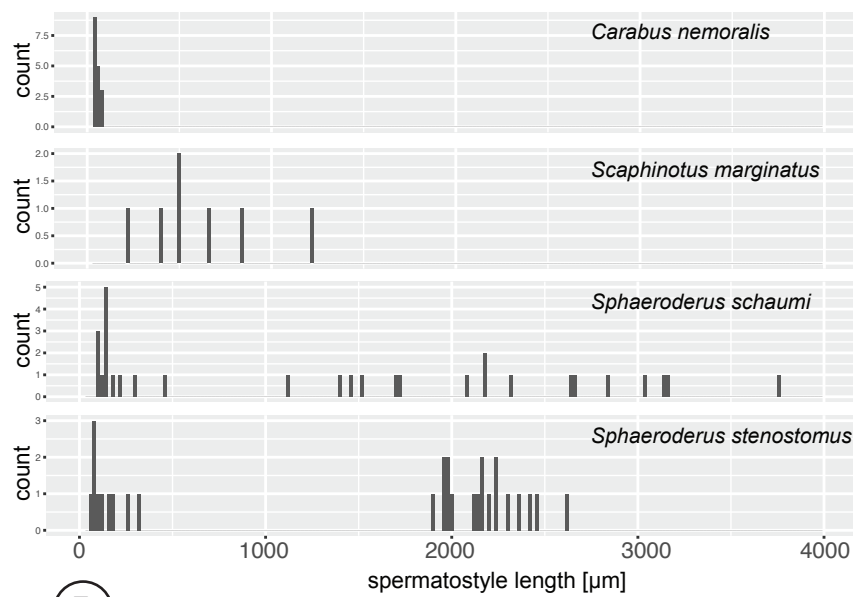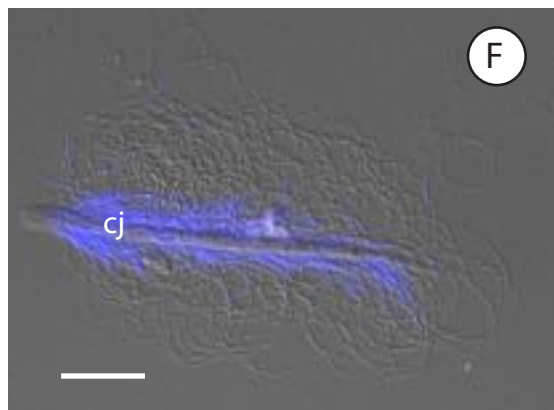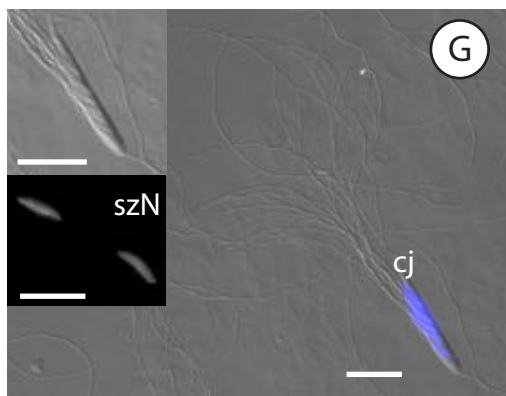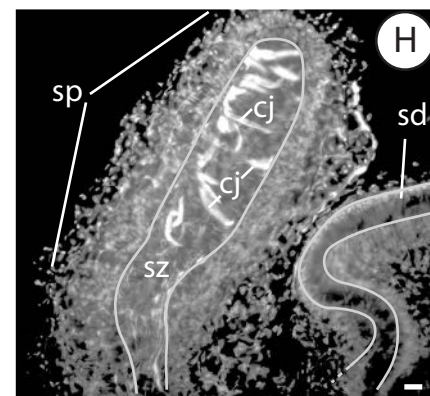

**Fig. 6**

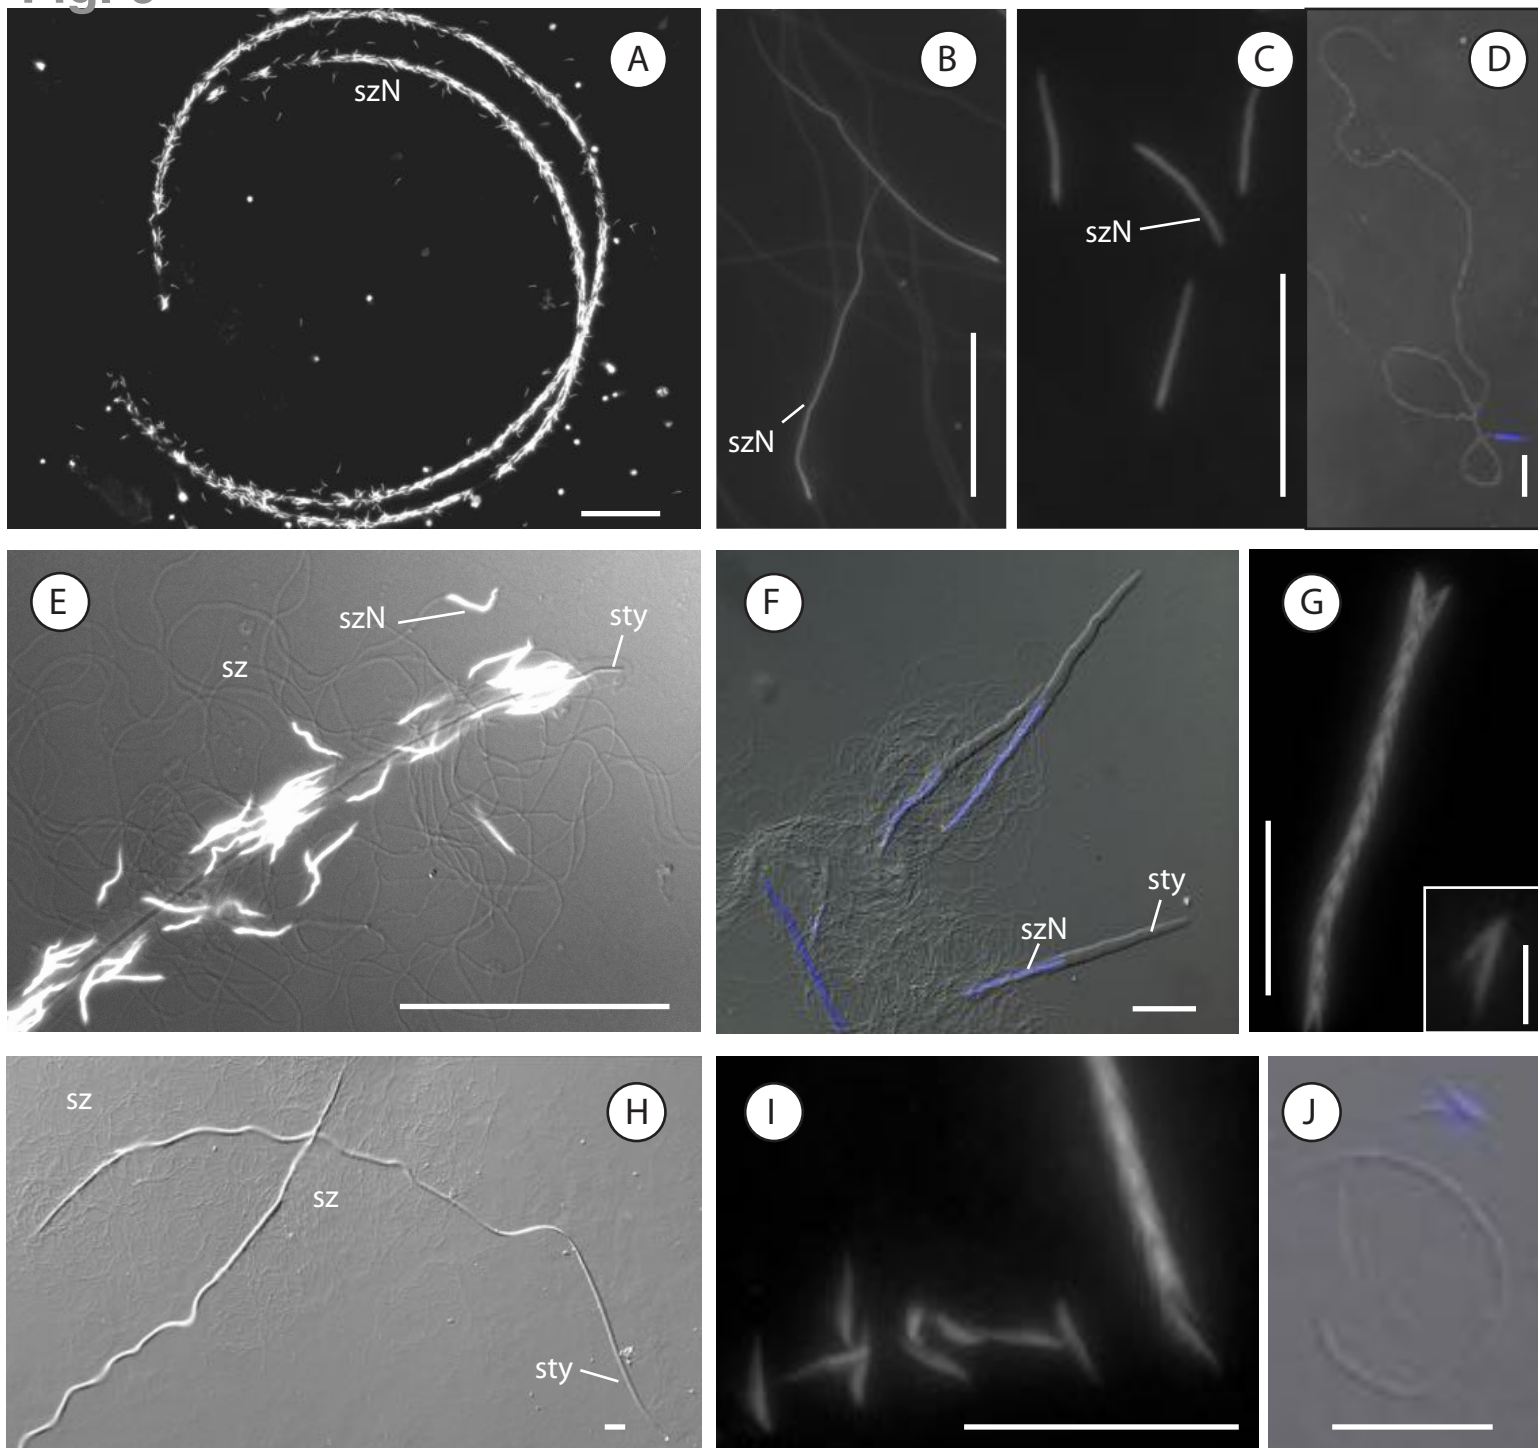

Fig. 7

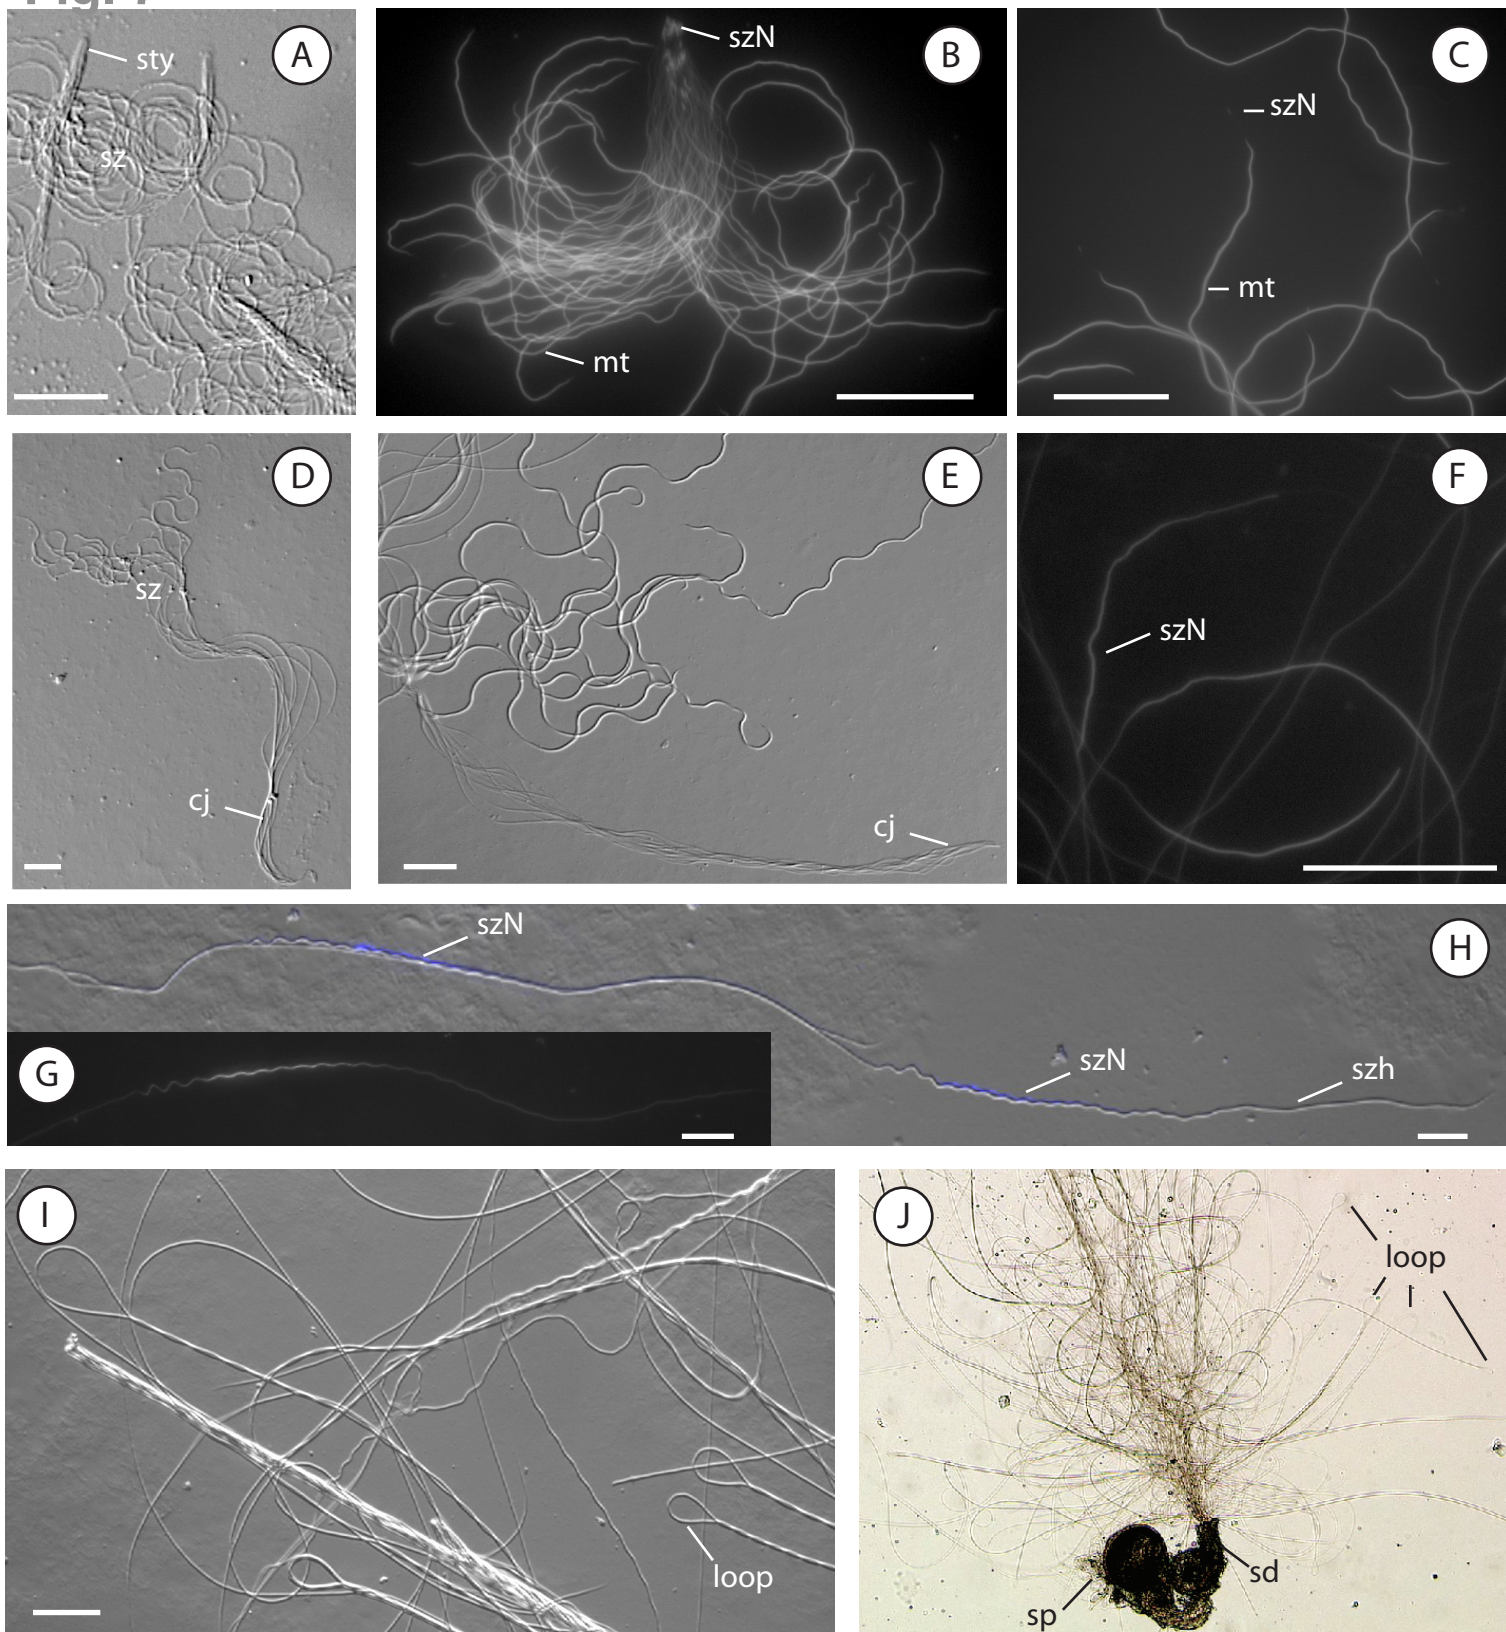

**Fig. 8**

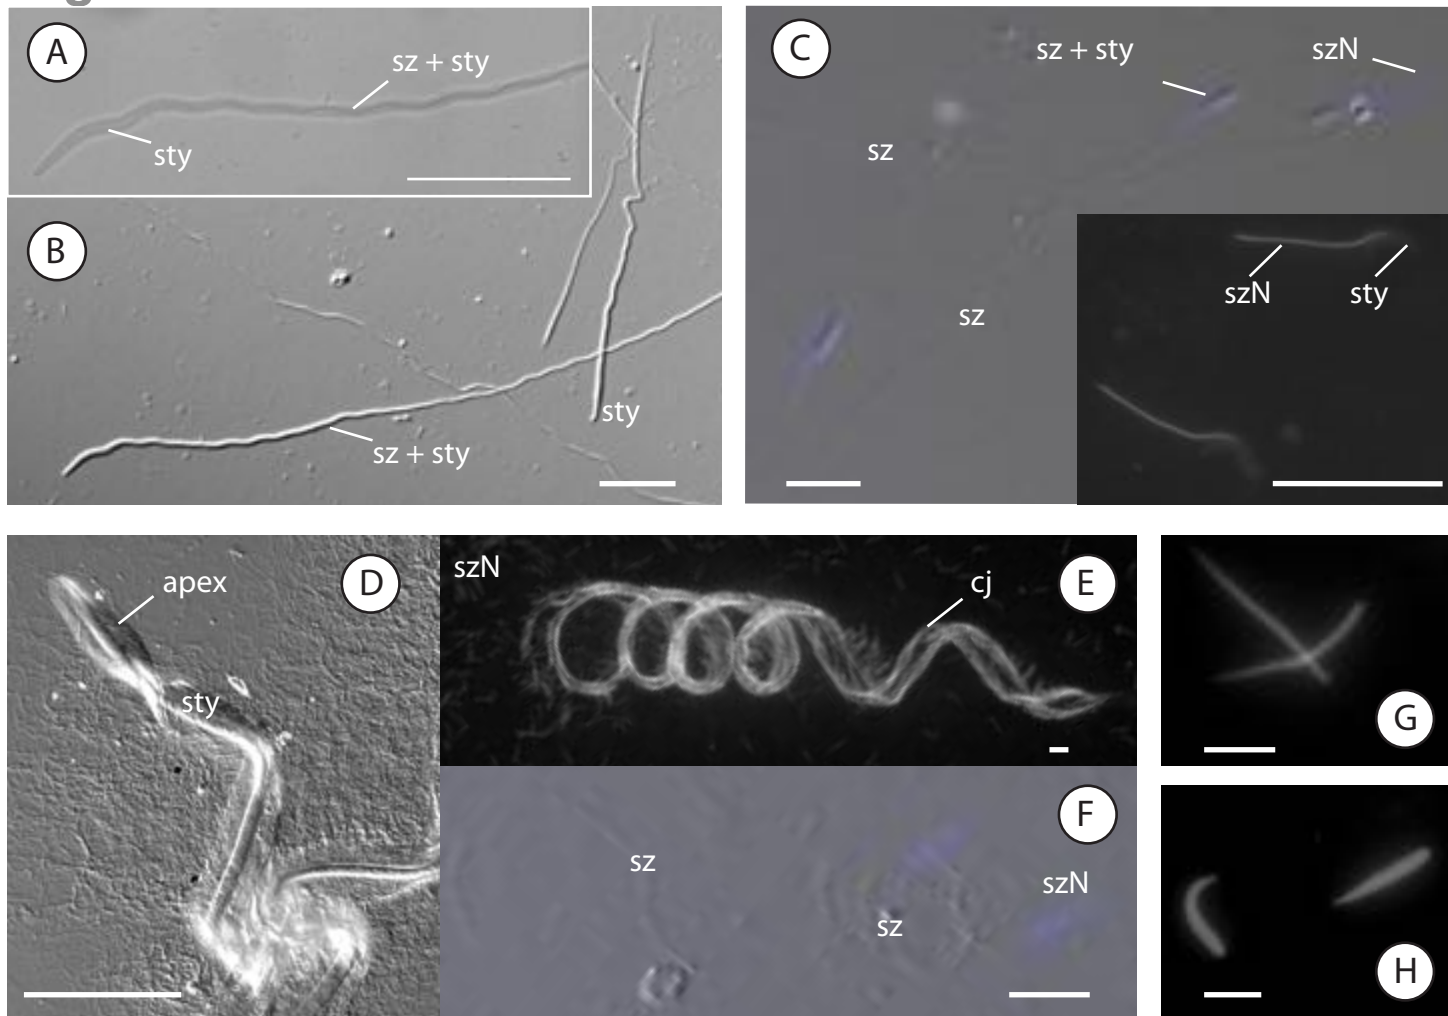

Fig. 9

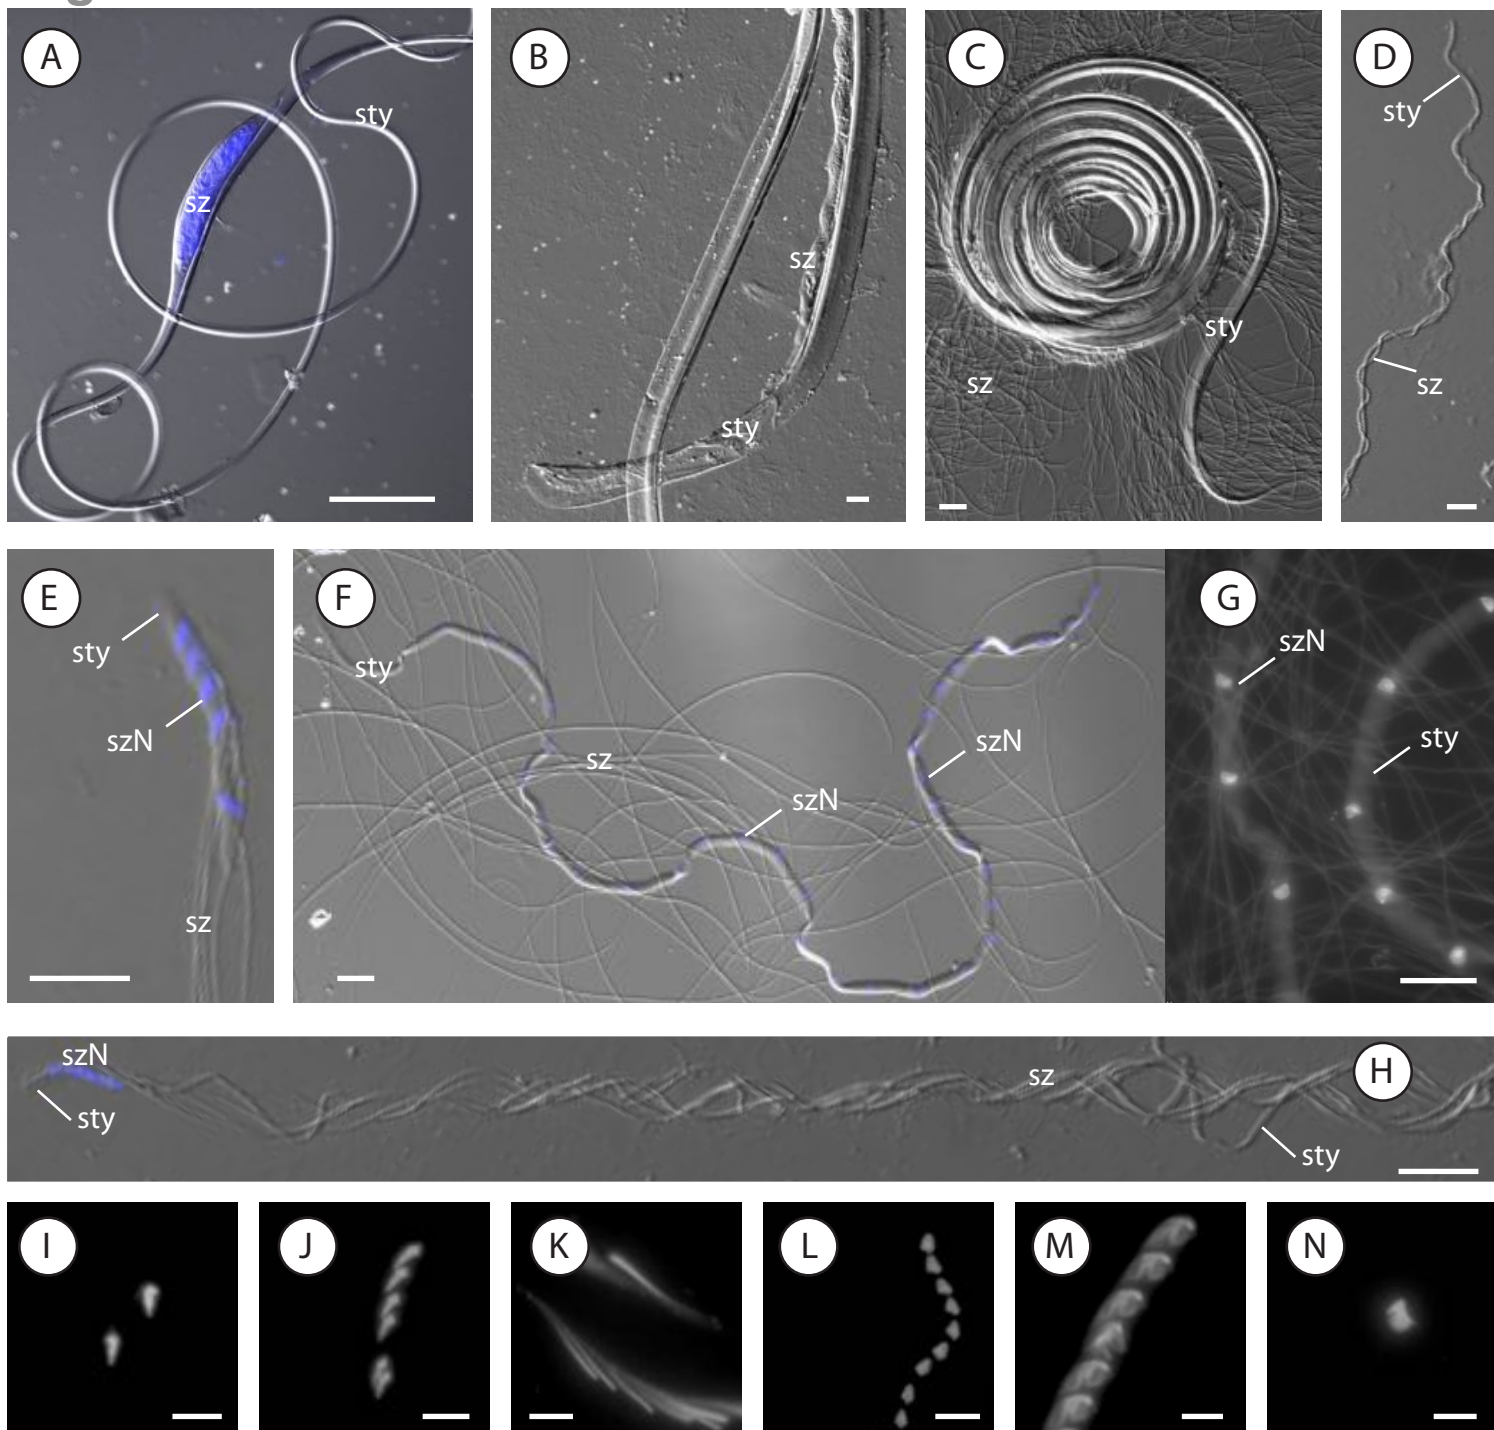

**Fig. 10**

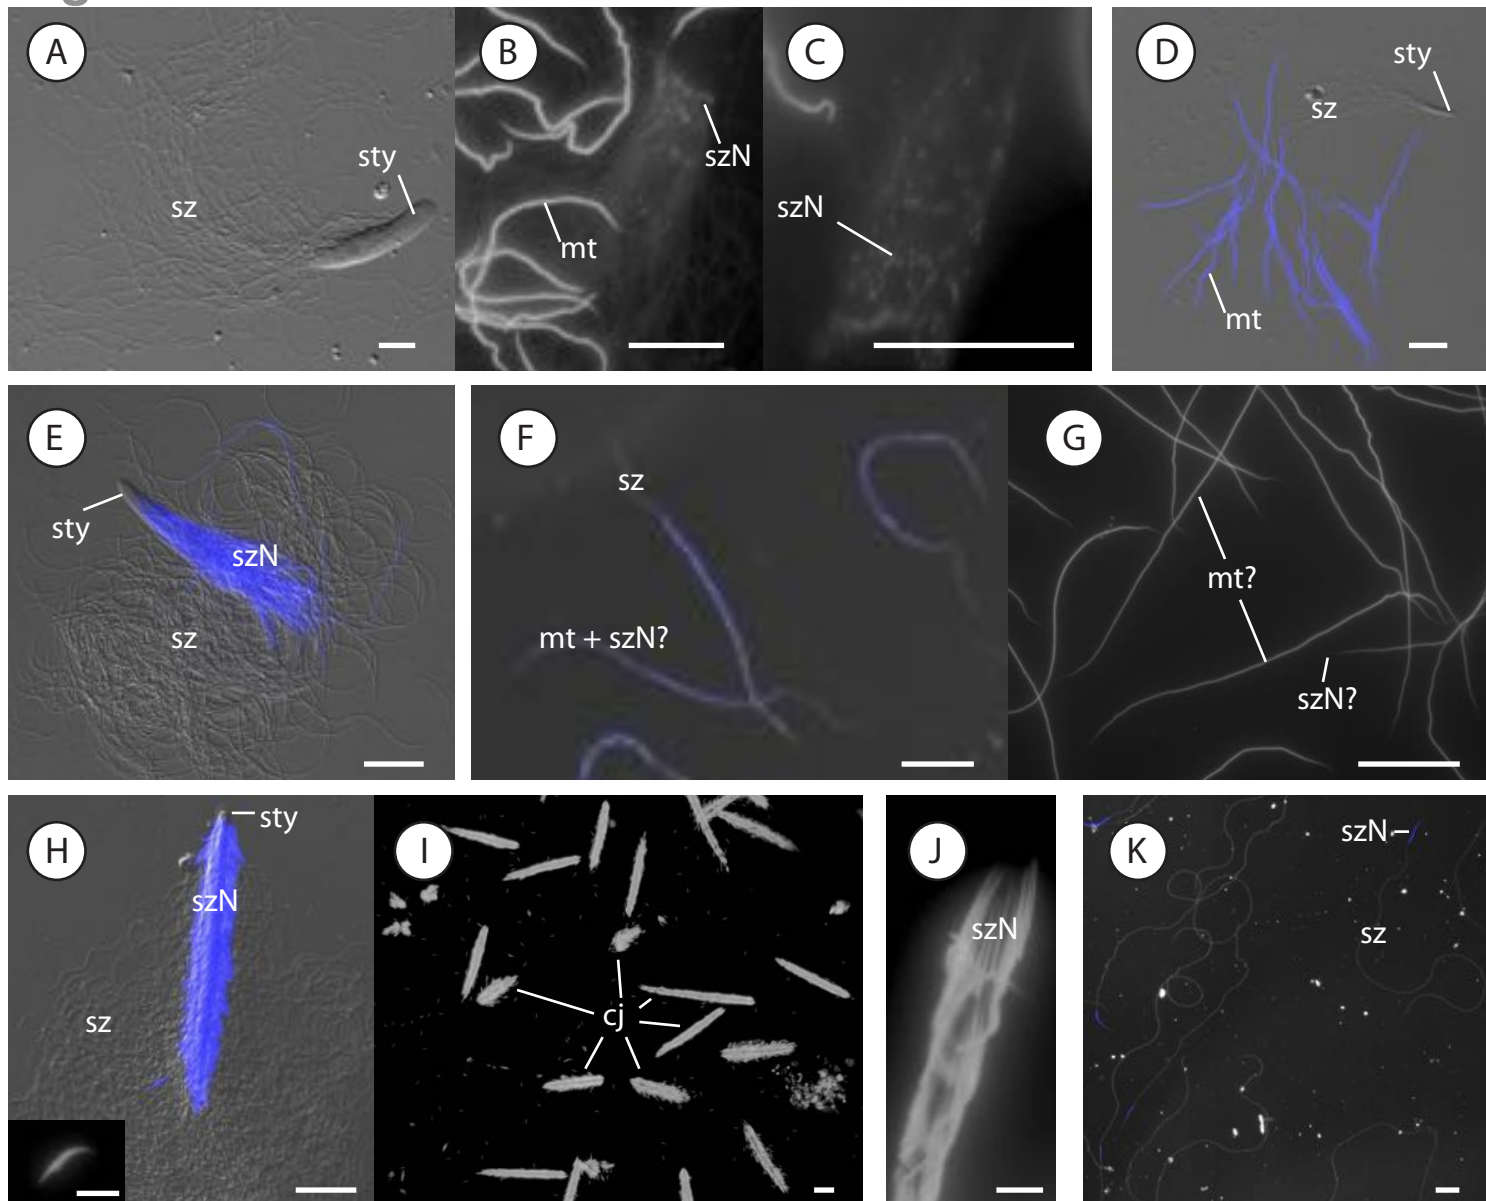

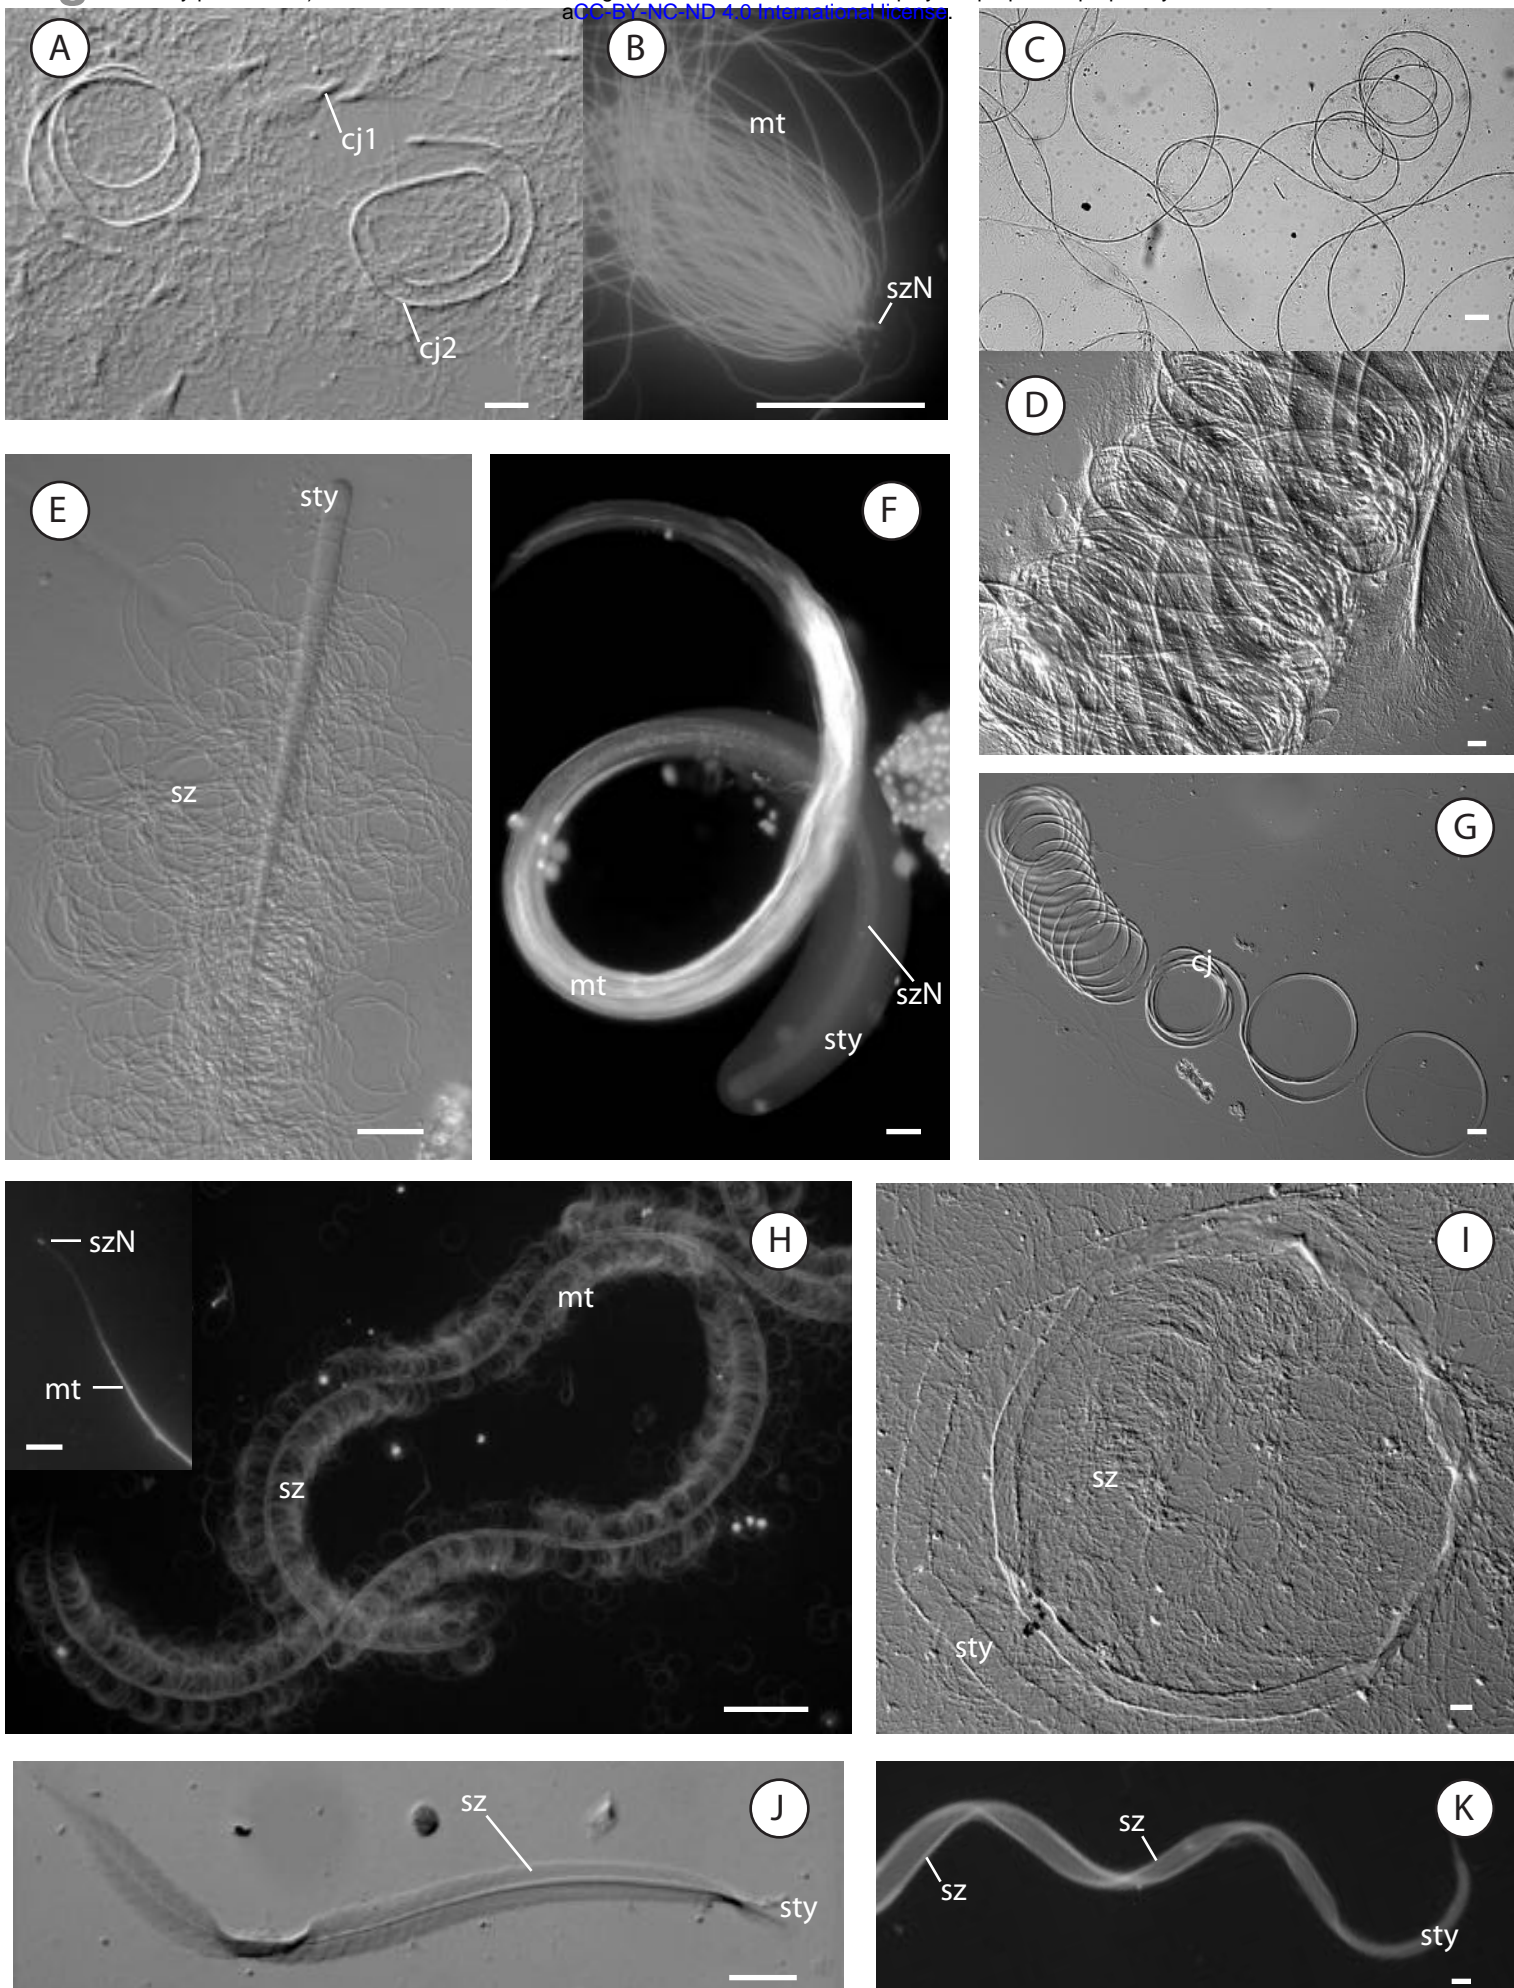



**Fig. 12**

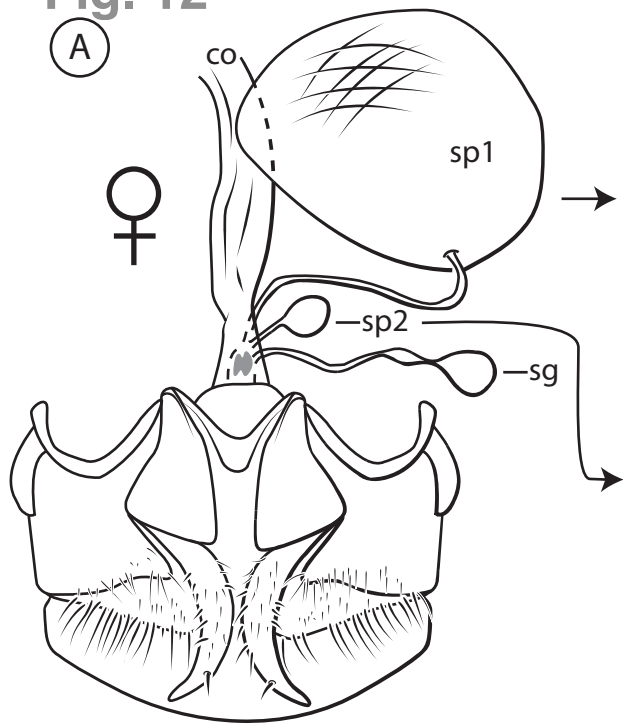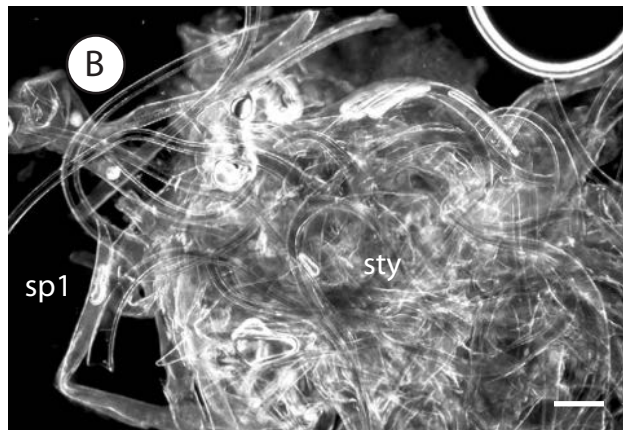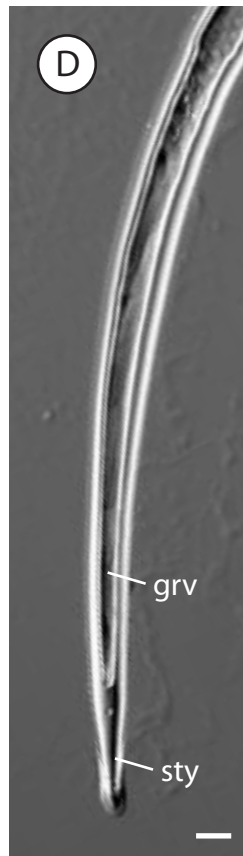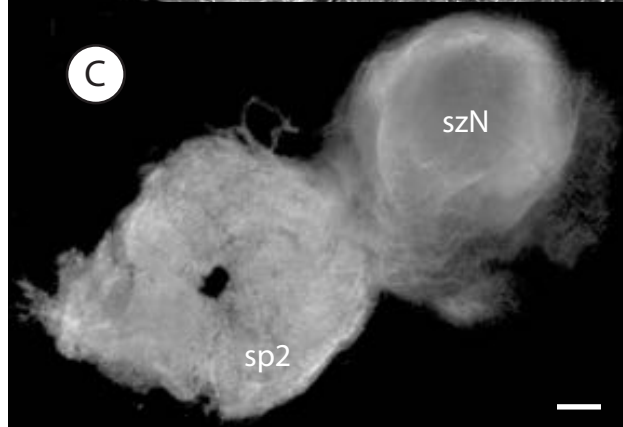

sperm from male tract

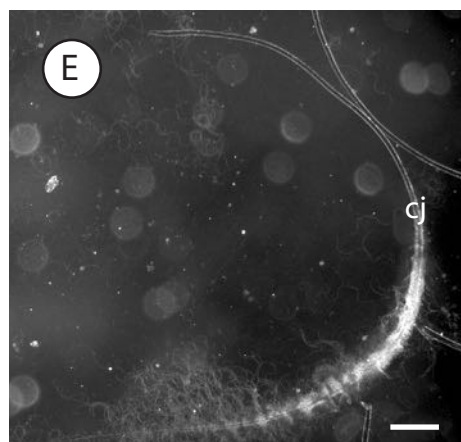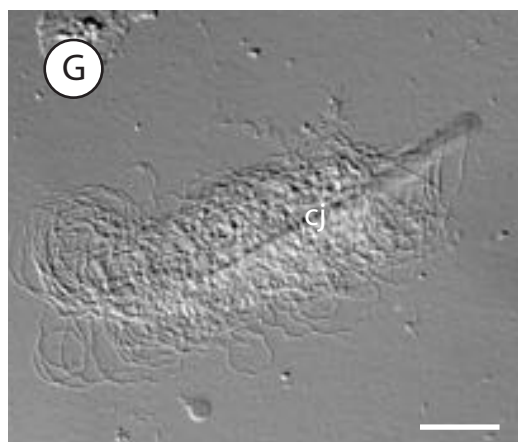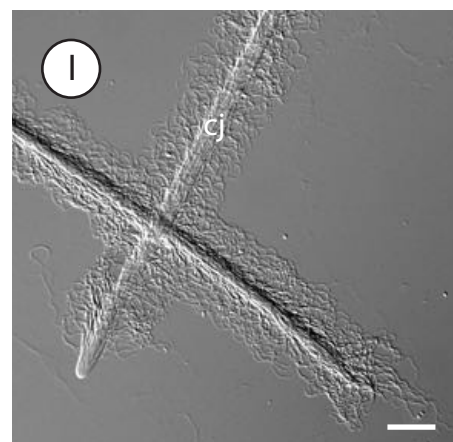

sperm from spermatheca

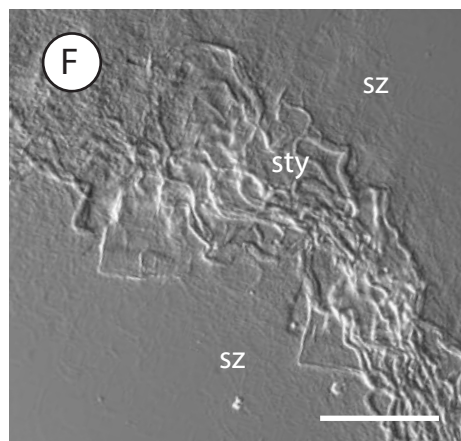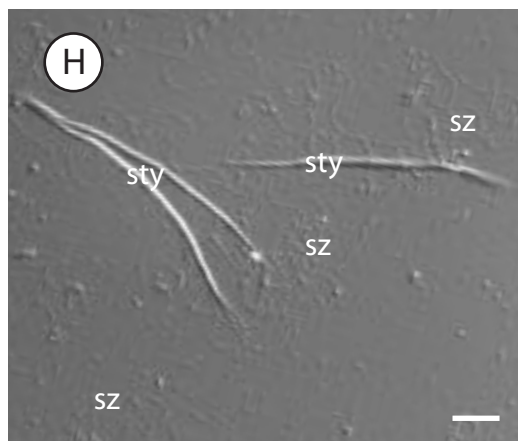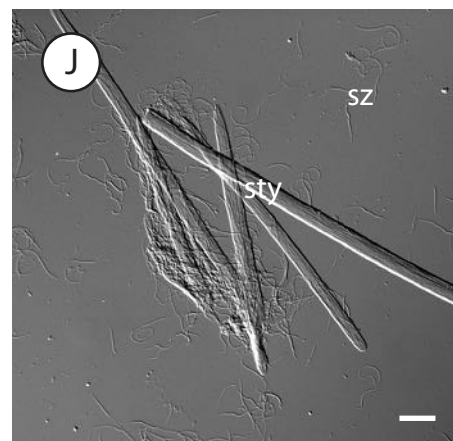

Source: https://www.biorxiv.org/content/10.1101/809863v1.full.pdf
